# Supplementary material
Source: Royal Society of Chemistry journal article supplement (doi:10.1039/d6nr00578k)
Supplement: d6nr00578k1.pdf [file d6nr00578k1.pdf]

## Supplementary Information

### Physically guided discovery of high-performance photocatalytic and photovoltaic heterostructures

Rong-Hui Tang<sup>a, †</sup>, Dong-Hui Xu<sup>a, †</sup>, Xiaoqing Liu<sup>b</sup>, Shuangli Yue<sup>a</sup>, Yitong Wang<sup>a</sup>, Li Zhang<sup>a</sup>, Yunpeng Lu<sup>c</sup>, Xian Wang<sup>a, \*</sup>, Mingli Yang<sup>d</sup>

*a. Institute of Atomic and Molecular Physics, Key Laboratory of High Energy Density Physics of Ministry of Education, Sichuan University, Chengdu 610065, China.*

*b. Department of Mechanical Engineering, National University of Singapore, Singapore 117575, Singapore*

*c. School of Chemistry, Chemical Engineering and Biotechnology, Nanyang Technological University, 637371, Singapore*

*d. Research Center for Materials Genome Engineering, Sichuan University, Chengdu 610065, China.*

## Contents of the Supporting Information

|                                                                                                                                                    |    |
|----------------------------------------------------------------------------------------------------------------------------------------------------|----|
| 1. <b>Table S1.</b> Correspondence between abbreviations and their full names in the heat map .....                                                | 3  |
| 2. <b>Table S2.</b> CBM, VBM, Band Gap and Electronegativity of the 1014 Monolayer Materials .....                                                 | 4  |
| 3. <b>Table S3.</b> Distribution statistics of the screening results based on $\Delta V$ and $\Delta\chi_m$ .....                                  | 40 |
| 4. <b>Table S4.</b> 46 potential Z-scheme heterostructure photocatalysts identified .....                                                          | 41 |
| 5. <b>Table S5.</b> 279 screened potential solar cell candidates .....                                                                             | 43 |
| 6. <b>Table S6.</b> Calculated formation energies and binding energies for heterostructures .....                                                  | 53 |
| 7. <b>Table S7.</b> Bader charge analysis for four representative heterostructures .....                                                           | 54 |
| 8. <b>Figure S1.</b> Five-fold cross-validation performance of the XGBoost model .....                                                             | 55 |
| 9. <b>Figure S2.</b> Prediction performance on an independent test set .....                                                                       | 56 |
| 10. <b>Figure S3.</b> PDOS of the $\text{Si}_2\text{F}_2/\text{Si}_2\text{H}_2$ heterostructure .....                                              | 57 |
| 11. <b>Figure S4.</b> Optical absorption and band aligning of the $\text{BiSF}/\text{Si}_2\text{H}_2$ .....                                        | 58 |
| 12. <b>Figure S5.</b> Optical absorption and band aligning of the $\text{BiTeF}/\text{K}_2\text{Cu}_2\text{Se}_2$ heterostructure .....            | 59 |
| 13. <b>Figure S6.</b> Optical absorption and band aligning of the $\text{Ta}_3\text{SeF}_7/\text{K}_2\text{Au}_2\text{Se}_2$ heterostructure ..... | 60 |
| 14. <b>Figure S7.</b> Optical absorption and band aligning of the $\text{TiSeS}/\text{In}_3\text{F}_3$ heterostructure .....                       | 61 |
| 15. <b>Figure S8.</b> Optical absorption and band aligning of the $\text{Si}_2\text{Te}_4/\text{MoAu}_2\text{Se}_4$ heterostructure .....          | 62 |
| 16. <b>Figure S9.</b> Optical absorption and band aligning of the $\text{Ta}_3\text{SF}_7/\text{K}_2\text{Au}_2\text{Se}_2$ heterostructure .....  | 63 |
| 17. <b>Figure S10.</b> Optical absorption and band aligning of the $\text{Ga}_2\text{O}_2/\text{Sc}_2\text{CH}_2$ heterostructure .....            | 64 |
| 18. <b>Figure S11.</b> Optical absorption and band aligning of the $\text{Rh}_4\text{S}_6/\text{Li}_2\text{S}_2\text{F}_2$ heterostructure .....   | 65 |
| 19. <b>Figure S12.</b> Band structure of the representative heterostructure $\text{HfBr}_2/\text{HfICl}$ .....                                     | 66 |
| 20. <b>Figure S13.</b> The representative heterostructures exhibits no symmetry operations .....                                                   | 67 |
| 21. <b>Figure S14.</b> Time evolution of the total energy during AIMD simulations .....                                                            | 68 |
| 22. <b>Figure S15.</b> CDD and planar-averaged CDD profiles .....                                                                                  | 69 |

**Table S1.** Correspondence between abbreviations and their full names in the heat map.

| Abbreviation | Full Name                       | Unit    |
|--------------|---------------------------------|---------|
| ehull        | Energy above convex hull        | eV/atom |
| hform        | Heat of formation               | eV/atom |
| gap_pbe      | Band gap (PBE)                  | eV      |
| cbm_pbe      | CBM (PBE)                       | eV      |
| energ        | Energy                          | eV      |
| Inporx       | Interband polarizability at (x) | Å       |
| Inpory       | Interband polarizability at (y) | Å       |
| Inporz       | Interband polarizability at (z) | Å       |
| natoms       | Number of atoms                 | -       |
| vbm_pbe      | VBM (PBE)                       | eV      |
| evac         | Vacuum level                    | eV      |

**Table S2.** CBM (eV), VBM (eV), Band Gap (eV), and Electronegativity of the 1014 Monolayer Materials.

| Formula                                         | CBM   | VBM   | Band gap | $\chi_m$ |
|-------------------------------------------------|-------|-------|----------|----------|
| CoHO <sub>2</sub>                               | -2.61 | -3.61 | 1.00     | 2.88     |
| Nb <sub>2</sub> Br <sub>6</sub>                 | -3.86 | -4.87 | 1.00     | 1.42     |
| Re <sub>6</sub> Te <sub>8</sub> F <sub>2</sub>  | -4.42 | -5.42 | 1.01     | 2.22     |
| In <sub>2</sub> Ge <sub>2</sub> Se <sub>2</sub> | -4.71 | -5.72 | 1.01     | 2.16     |
| Os <sub>2</sub> O <sub>4</sub>                  | -5.89 | -6.89 | 1.01     | 2.88     |
| Ta <sub>4</sub> Cl <sub>2</sub> S <sub>12</sub> | -4.30 | -5.31 | 1.01     | 2.44     |
| Cu <sub>2</sub> O <sub>2</sub>                  | -6.04 | -7.05 | 1.01     | 2.71     |
| Hf <sub>2</sub> I <sub>4</sub>                  | -3.09 | -4.10 | 1.01     | 2.14     |
| Ta <sub>4</sub> I <sub>2</sub> Se <sub>12</sub> | -4.12 | -5.13 | 1.01     | 2.24     |
| Mo <sub>2</sub> F <sub>6</sub>                  | -5.96 | -6.97 | 1.01     | 3.69     |
| Nb <sub>2</sub> Te <sub>4</sub> Cl <sub>4</sub> | -3.99 | -5.01 | 1.02     | 2.07     |
| HfI <sub>2</sub>                                | -2.15 | -3.17 | 1.02     | 2.14     |
| Hf <sub>2</sub> BrI <sub>5</sub>                | -3.43 | -4.46 | 1.02     | 2.26     |
| Ta <sub>4</sub> Te <sub>12</sub> I <sub>2</sub> | -3.81 | -4.84 | 1.02     | 2.05     |
| Co <sub>2</sub> O <sub>2</sub> Cl <sub>2</sub>  | -5.49 | -6.52 | 1.03     | 2.69     |
| Zr <sub>2</sub> Sn <sub>2</sub> Te <sub>8</sub> | -3.70 | -4.73 | 1.03     | 2.03     |
| Zr <sub>2</sub> Se <sub>6</sub>                 | -4.61 | -5.64 | 1.03     | 2.25     |
| Ag <sub>4</sub> Se <sub>4</sub> I <sub>4</sub>  | -5.73 | -6.76 | 1.03     | 2.24     |
| MoCr <sub>3</sub> S <sub>8</sub>                | -2.74 | -3.77 | 1.03     | 2.29     |
| PdNiIr <sub>2</sub> Se <sub>8</sub>             | -4.71 | -5.74 | 1.03     | 2.13     |
| Nb <sub>4</sub> I <sub>2</sub> Se <sub>12</sub> | -4.23 | -5.26 | 1.03     | 1.57     |
| TiI <sub>2</sub> Br                             | -2.38 | -3.41 | 1.04     | 2.30     |
| In <sub>2</sub> Si <sub>2</sub> Te <sub>2</sub> | -4.22 | -5.25 | 1.04     | 1.99     |
| ZrI <sub>2</sub>                                | -2.31 | -3.35 | 1.04     | 2.16     |
| Bi <sub>2</sub> S <sub>3</sub>                  | -5.83 | -6.87 | 1.04     | 2.43     |
| LiC <sub>12</sub>                               | -1.93 | -2.97 | 1.04     | 2.62     |
| Bi <sub>2</sub> O <sub>2</sub>                  | -3.87 | -4.91 | 1.04     | 2.99     |

---

|                                        |       |       |      |      |
|----------------------------------------|-------|-------|------|------|
| $\text{Ir}_2\text{IBrS}_2$             | -4.46 | -5.51 | 1.05 | 2.20 |
| $\text{Rh}_4\text{Se}_8$               | -4.94 | -5.99 | 1.05 | 2.05 |
| $\text{Fe}_2\text{Se}_4$               | -4.69 | -5.74 | 1.05 | 2.18 |
| $\text{Zr}_2\text{ClBr}_5$             | -3.50 | -4.56 | 1.05 | 2.54 |
| $\text{Os}_3\text{S}_{12}$             | -4.58 | -5.64 | 1.06 | 2.36 |
| $\text{Na}_2\text{Be}_2\text{P}_2$     | -1.20 | -2.26 | 1.06 | 1.99 |
| $\text{AgAlTe}_6\text{P}_2$            | -4.00 | -5.06 | 1.07 | 2.14 |
| $\text{Nb}_4\text{Br}_2\text{Se}_{12}$ | -4.19 | -5.26 | 1.07 | 1.60 |
| $\text{Au}_2\text{Te}_2$               | -4.10 | -5.17 | 1.07 | 2.01 |
| $\text{Hf}_2\text{Ge}_2\text{Te}_8$    | -3.73 | -4.79 | 1.07 | 2.04 |
| $\text{Ta}_4\text{Br}_2\text{Se}_{12}$ | -4.04 | -5.11 | 1.07 | 2.29 |
| $\text{Ru}_2\text{Te}_4$               | -3.92 | -4.99 | 1.07 | 1.89 |
| $\text{SiSe}_2$                        | -5.01 | -6.08 | 1.07 | 2.35 |
| $\text{Cu}_2\text{Cl}_2\text{I}_4$     | -5.96 | -7.04 | 1.07 | 2.42 |
| $\text{Zr}_2\text{P}_2\text{Se}_6$     | -4.29 | -5.36 | 1.07 | 2.26 |
| $\text{AgBiTe}_6\text{P}_2$            | -4.22 | -5.30 | 1.08 | 2.15 |
| $\text{Nb}_4\text{Cl}_2\text{Se}_{12}$ | -4.15 | -5.23 | 1.08 | 1.55 |
| $\text{Ta}_2\text{Te}_4\text{Br}_4$    | -3.85 | -4.93 | 1.08 | 2.30 |
| $\text{Si}_2\text{Te}_4$               | -3.72 | -4.81 | 1.09 | 2.11 |
| $\text{PtTeSe}$                        | -4.14 | -5.23 | 1.09 | 2.02 |
| $\text{Ta}_4\text{Te}_{12}\text{Br}_2$ | -3.74 | -4.83 | 1.09 | 2.09 |
| $\text{Cu}_4\text{Te}_4\text{I}_4$     | -5.32 | -6.42 | 1.10 | 2.23 |
| $\text{Hf}_2\text{Ti}_2\text{ClBr}_7$  | -3.27 | -4.37 | 1.10 | 2.45 |
| $\text{Ag}_4\text{Te}_4\text{I}_4$     | -5.36 | -6.46 | 1.10 | 2.18 |
| $\text{Hf}_2\text{P}_2\text{Se}_6$     | -4.30 | -5.39 | 1.10 | 2.26 |
| $\text{Au}_4\text{Se}_4$               | -4.49 | -5.59 | 1.10 | 2.13 |
| $\text{Y}_2\text{CH}_2\text{O}_2$      | -1.01 | -2.11 | 1.10 | 0.76 |
| $\text{Ge}_2\text{Te}_2$               | -3.21 | -4.31 | 1.10 | 2.11 |
| $\text{Ta}_4\text{Cl}_2\text{Se}_{12}$ | -3.98 | -5.09 | 1.10 | 2.31 |

---

---

|                                                    |       |       |      |      |
|----------------------------------------------------|-------|-------|------|------|
| CrMo <sub>3</sub> Te <sub>8</sub>                  | -3.64 | -4.74 | 1.11 | 1.96 |
| CrW <sub>3</sub> S <sub>8</sub>                    | -2.53 | -3.64 | 1.11 | 2.26 |
| MoAg <sub>2</sub> Te <sub>4</sub>                  | -3.80 | -4.91 | 1.12 | 2.05 |
| Zr <sub>2</sub> Ge <sub>2</sub> Te <sub>8</sub>    | -3.69 | -4.81 | 1.12 | 2.05 |
| Ag <sub>2</sub> O <sub>2</sub>                     | -5.57 | -6.70 | 1.13 | 2.63 |
| CrSe <sub>2</sub>                                  | -4.00 | -5.13 | 1.13 | 2.19 |
| Rh <sub>2</sub> O <sub>2</sub> F <sub>2</sub>      | -6.41 | -7.54 | 1.13 | 3.02 |
| Ru <sub>3</sub> S <sub>3</sub> Cl <sub>6</sub>     | -6.57 | -7.70 | 1.13 | 2.45 |
| Zr <sub>2</sub> Se <sub>4</sub>                    | -4.50 | -5.64 | 1.13 | 2.19 |
| Cu <sub>4</sub> Te <sub>4</sub> Br <sub>4</sub>    | -5.61 | -6.75 | 1.14 | 2.33 |
| Nb <sub>4</sub> Te <sub>12</sub> I <sub>2</sub>    | -3.80 | -4.93 | 1.14 | 1.51 |
| Ta <sub>4</sub> Te <sub>12</sub> Cl <sub>2</sub>   | -3.69 | -4.82 | 1.14 | 2.12 |
| RhIr <sub>2</sub> GaS <sub>4</sub> Br <sub>4</sub> | -5.16 | -6.30 | 1.14 | 2.30 |
| Au <sub>4</sub> S <sub>2</sub>                     | -4.24 | -5.38 | 1.14 | 2.10 |
| Zr <sub>2</sub> Br <sub>4</sub>                    | -3.35 | -4.49 | 1.14 | 2.43 |
| In <sub>2</sub> TeS                                | -4.42 | -5.56 | 1.14 | 2.20 |
| WTe <sub>2</sub>                                   | -3.36 | -4.50 | 1.14 | 1.93 |
| Y <sub>4</sub> Te <sub>4</sub> Br <sub>4</sub>     | -4.91 | -6.06 | 1.14 | 1.45 |
| CrO <sub>2</sub>                                   | -6.45 | -7.60 | 1.14 | 3.03 |
| AgGaCl <sub>2</sub> Br <sub>4</sub>                | -6.81 | -7.95 | 1.15 | 2.58 |
| MgGa <sub>2</sub> Se <sub>4</sub>                  | -4.39 | -5.53 | 1.15 | 2.30 |
| Hf <sub>2</sub> IClBr <sub>4</sub>                 | -3.43 | -4.57 | 1.15 | 2.49 |
| Zr <sub>2</sub> Br <sub>2</sub> Cl <sub>2</sub>    | -3.43 | -4.58 | 1.15 | 2.51 |
| In <sub>2</sub> Ge <sub>2</sub> Te <sub>6</sub>    | -4.20 | -5.35 | 1.15 | 2.10 |
| Hf <sub>2</sub> I <sub>2</sub> Br <sub>2</sub>     | -3.10 | -4.25 | 1.15 | 2.28 |
| BiTeCl                                             | -5.14 | -6.29 | 1.15 | 2.43 |
| PdNiS <sub>4</sub>                                 | -5.27 | -6.42 | 1.15 | 2.24 |
| ZrTiHf <sub>2</sub> Br <sub>8</sub>                | -3.23 | -4.38 | 1.16 | 2.42 |
| HfIBr                                              | -2.20 | -3.36 | 1.16 | 2.28 |

---

---

|                                                  |       |       |      |      |
|--------------------------------------------------|-------|-------|------|------|
| Hf <sub>2</sub> Si <sub>2</sub> Te <sub>8</sub>  | -3.65 | -4.81 | 1.16 | 2.03 |
| Cu <sub>4</sub> S <sub>4</sub> I <sub>4</sub>    | -5.78 | -6.94 | 1.16 | 2.34 |
| Cr <sub>3</sub> Se <sub>6</sub>                  | -4.11 | -5.27 | 1.16 | 2.19 |
| BiTeBr                                           | -5.16 | -6.32 | 1.16 | 2.35 |
| Sc <sub>4</sub> Se <sub>6</sub>                  | -2.29 | -3.45 | 1.16 | 2.19 |
| MgAl <sub>2</sub> Te <sub>4</sub>                | -3.44 | -4.60 | 1.16 | 2.05 |
| Rh <sub>4</sub> S <sub>6</sub>                   | -5.36 | -6.52 | 1.16 | 2.08 |
| Zr <sub>2</sub> Cl <sub>4</sub>                  | -3.54 | -4.70 | 1.16 | 2.59 |
| BiTeBr                                           | -5.05 | -6.21 | 1.16 | 2.35 |
| Ag <sub>4</sub> S <sub>4</sub> Cl <sub>4</sub>   | -6.43 | -7.59 | 1.16 | 2.44 |
| Ga <sub>2</sub> Ge <sub>2</sub> Te <sub>2</sub>  | -4.08 | -5.25 | 1.17 | 2.04 |
| Hf <sub>2</sub> I <sub>Br</sub> <sub>3</sub>     | -2.24 | -3.41 | 1.17 | 2.35 |
| W <sub>2</sub> Cl <sub>6</sub>                   | -3.65 | -4.82 | 1.17 | 2.60 |
| TiBr <sub>2</sub>                                | -2.39 | -3.56 | 1.17 | 2.43 |
| Fe <sub>2</sub> Te <sub>6</sub> P <sub>2</sub>   | -4.45 | -5.62 | 1.17 | 2.08 |
| ZrI <sub>Br</sub>                                | -2.35 | -3.53 | 1.17 | 2.29 |
| Y <sub>4</sub> Te <sub>4</sub> Cl <sub>4</sub>   | -4.93 | -6.11 | 1.17 | 1.60 |
| Y <sub>2</sub> NH <sub>2</sub> O <sub>2</sub>    | -1.34 | -2.52 | 1.17 | 2.84 |
| Ta <sub>2</sub> Te <sub>4</sub> I <sub>4</sub>   | -3.75 | -4.93 | 1.18 | 2.14 |
| BiSI                                             | -5.19 | -6.36 | 1.18 | 2.37 |
| Ir <sub>2</sub> S <sub>2</sub> Br <sub>2</sub>   | -4.66 | -5.84 | 1.18 | 2.25 |
| BiTeF                                            | -4.38 | -5.56 | 1.18 | 2.99 |
| IrGaS <sub>2</sub> I <sub>2</sub>                | -4.45 | -5.63 | 1.18 | 2.25 |
| HfZr <sub>3</sub> BrCl <sub>7</sub>              | -3.48 | -4.66 | 1.18 | 2.57 |
| Nb <sub>4</sub> Te <sub>12</sub> Br <sub>2</sub> | -3.76 | -4.94 | 1.18 | 1.50 |
| Nb <sub>4</sub> Te <sub>12</sub> Cl <sub>2</sub> | -3.73 | -4.91 | 1.18 | 1.52 |
| In <sub>2</sub> Si <sub>2</sub> Te <sub>6</sub>  | -4.23 | -5.41 | 1.18 | 2.09 |
| TiI <sub>Cl</sub>                                | -2.45 | -3.64 | 1.19 | 2.38 |
| BiSeI                                            | -5.11 | -6.30 | 1.19 | 2.31 |

---

---

|                                                       |       |       |      |      |
|-------------------------------------------------------|-------|-------|------|------|
| $\text{Bi}_2\text{Se}_2\text{Br}_2$                   | -5.61 | -6.80 | 1.19 | 2.45 |
| $\text{Zr}_2\text{Si}_2\text{Te}_8$                   | -3.63 | -4.82 | 1.19 | 2.04 |
| $\text{OsRuCl}_6$                                     | -5.17 | -6.37 | 1.20 | 2.54 |
| $\text{BiTeCl}$                                       | -5.19 | -6.39 | 1.20 | 2.43 |
| $\text{Nb}_2\text{Br}_2\text{Cl}_4$                   | -3.98 | -5.18 | 1.20 | 1.98 |
| $\text{Ir}_2\text{S}_2\text{Cl}_2$                    | -5.09 | -6.29 | 1.20 | 2.32 |
| $\text{ZrSe}_2$                                       | -4.68 | -5.89 | 1.20 | 2.19 |
| $\text{W}_2\text{Cr}_2\text{Se}_8$                    | -3.87 | -5.07 | 1.20 | 2.16 |
| $\text{Co}_2\text{H}_2\text{S}_4$                     | -4.61 | -5.82 | 1.20 | 2.29 |
| $\text{RuNiTa}_2\text{Se}_6$                          | -4.49 | -5.69 | 1.20 | 2.11 |
| $\text{Mg}_2\text{Al}_2\text{Te}_5$                   | -3.37 | -4.58 | 1.21 | 2.04 |
| $\text{WTeO}$                                         | -3.71 | -4.92 | 1.21 | 2.47 |
| $\text{Cu}_4\text{Se}_4\text{I}_4$                    | -5.59 | -6.81 | 1.21 | 2.29 |
| $\text{Cu}_2\text{Br}_2\text{O}_4$                    | -6.49 | -7.70 | 1.21 | 2.87 |
| $\text{ZrHf}_2\text{Se}_6$                            | -4.63 | -5.84 | 1.21 | 2.19 |
| $\text{Ag}_4\text{Se}_4\text{Br}_4$                   | -6.07 | -7.28 | 1.21 | 2.34 |
| $\text{Sc}_4\text{Te}_6$                              | -4.06 | -5.28 | 1.21 | 1.96 |
| $\text{Sc}_2\text{P}_2\text{Se}_6$                    | -3.77 | -4.99 | 1.21 | 2.28 |
| $\text{AgGa}_3\text{O}_4\text{Cl}_4$                  | -6.78 | -8.00 | 1.22 | 2.93 |
| $\text{BiSeI}$                                        | -5.21 | -6.42 | 1.22 | 2.31 |
| $\text{TeGe}_2\text{S}$                               | -3.27 | -4.48 | 1.22 | 2.26 |
| $\text{HfSe}_2$                                       | -4.60 | -5.81 | 1.22 | 2.19 |
| $\text{MoW}_3\text{Te}_8$                             | -3.36 | -4.58 | 1.22 | 1.93 |
| $\text{Nb}_2\text{Te}_4\text{Br}_4$                   | -3.83 | -5.05 | 1.22 | 1.78 |
| $\text{Ta}_3\text{TeI}_7$                             | -3.78 | -5.01 | 1.22 | 2.15 |
| $\text{HfBr}_2$                                       | -2.28 | -3.50 | 1.23 | 2.41 |
| $\text{K}_2\text{C}_2\text{Se}_2\text{H}_6\text{S}_6$ | -2.05 | -3.28 | 1.23 | 1.28 |
| $\text{Ta}_2\text{Rh}_2\text{S}_8$                    | -5.12 | -6.36 | 1.23 | 2.22 |
| $\text{Pd}_2\text{Se}_4$                              | -4.11 | -5.35 | 1.23 | 2.06 |

---

---

|                                                 |       |       |      |      |
|-------------------------------------------------|-------|-------|------|------|
| Nb <sub>3</sub> SI <sub>7</sub>                 | -4.10 | -5.33 | 1.24 | 1.32 |
| Nb <sub>3</sub> SeI <sub>7</sub>                | -4.04 | -5.27 | 1.24 | 1.31 |
| Zr <sub>2</sub> N <sub>2</sub> I <sub>2</sub>   | -3.96 | -5.20 | 1.24 | 2.41 |
| CrMo <sub>3</sub> S <sub>8</sub>                | -2.65 | -3.89 | 1.24 | 2.26 |
| Cu <sub>4</sub> O <sub>4</sub> Cl <sub>4</sub>  | -7.59 | -8.82 | 1.24 | 2.75 |
| In <sub>2</sub> Al <sub>2</sub> Te <sub>6</sub> | -4.35 | -5.59 | 1.24 | 2.07 |
| Al <sub>2</sub> Ge <sub>2</sub> Se <sub>2</sub> | -3.43 | -4.67 | 1.24 | 2.14 |
| Nb <sub>3</sub> TeI <sub>7</sub>                | -3.94 | -5.19 | 1.24 | 1.30 |
| CrSeS                                           | -4.22 | -5.46 | 1.24 | 2.25 |
| Ag <sub>4</sub> Te <sub>4</sub> Cl <sub>4</sub> | -5.73 | -6.98 | 1.25 | 2.34 |
| MoAu <sub>2</sub> Se <sub>4</sub>               | -3.72 | -4.97 | 1.25 | 2.12 |
| Ge <sub>2</sub> Te <sub>6</sub> P <sub>2</sub>  | -3.89 | -5.14 | 1.25 | 2.16 |
| Nb <sub>2</sub> Ir <sub>2</sub> S <sub>8</sub>  | -5.06 | -6.31 | 1.25 | 1.62 |
| Ga <sub>4</sub> Se <sub>6</sub>                 | -4.11 | -5.36 | 1.25 | 2.32 |
| Ta <sub>3</sub> SeI <sub>7</sub>                | -3.85 | -5.11 | 1.26 | 2.18 |
| Ag <sub>4</sub> Te <sub>4</sub> Br <sub>4</sub> | -5.60 | -6.86 | 1.26 | 2.28 |
| Mg <sub>2</sub> Ga <sub>2</sub> Se <sub>5</sub> | -4.27 | -5.53 | 1.26 | 2.29 |
| Au <sub>2</sub> Se <sub>2</sub> Br <sub>2</sub> | -5.41 | -6.68 | 1.27 | 2.29 |
| ZrBr <sub>2</sub>                               | -2.40 | -3.68 | 1.28 | 2.43 |
| In <sub>4</sub> I <sub>4</sub>                  | -1.86 | -3.14 | 1.28 | 2.20 |
| Ag <sub>4</sub> Se <sub>4</sub> Cl <sub>4</sub> | -6.20 | -7.48 | 1.28 | 2.40 |
| W <sub>2</sub> Mo <sub>2</sub> Te <sub>8</sub>  | -3.38 | -4.66 | 1.28 | 1.94 |
| Nb <sub>2</sub> Te <sub>4</sub> I <sub>4</sub>  | -3.76 | -5.04 | 1.28 | 1.66 |
| Au <sub>4</sub> F <sub>8</sub>                  | -6.35 | -7.63 | 1.29 | 3.26 |
| Cu <sub>2</sub> Cl <sub>2</sub> O <sub>4</sub>  | -6.62 | -7.91 | 1.29 | 2.91 |
| Pd <sub>4</sub> In <sub>2</sub> Se <sub>6</sub> | -4.26 | -5.55 | 1.29 | 1.99 |
| In <sub>4</sub> Te <sub>6</sub>                 | -4.22 | -5.51 | 1.29 | 2.07 |
| Zn <sub>2</sub> Te <sub>2</sub>                 | -3.96 | -5.25 | 1.29 | 2.48 |
| Ta <sub>3</sub> SI <sub>7</sub>                 | -3.90 | -5.19 | 1.30 | 2.19 |

---

---

|                                                                |       |       |      |      |
|----------------------------------------------------------------|-------|-------|------|------|
| HfCl                                                           | -2.28 | -3.57 | 1.30 | 2.36 |
| Ti <sub>2</sub> CO <sub>2</sub>                                | -4.80 | -6.09 | 1.30 | 2.78 |
| TiBrCl                                                         | -2.48 | -3.78 | 1.30 | 2.51 |
| K <sub>2</sub> Ag <sub>2</sub> Se <sub>2</sub>                 | -1.52 | -2.82 | 1.30 | 1.49 |
| CaSn <sub>3</sub> S <sub>4</sub> Br <sub>4</sub>               | -5.01 | -6.31 | 1.30 | 2.26 |
| Bi <sub>2</sub> P <sub>2</sub> S <sub>6</sub>                  | -4.73 | -6.04 | 1.32 | 2.46 |
| ZrCl                                                           | -2.41 | -3.72 | 1.32 | 2.37 |
| Zr <sub>4</sub> S <sub>2</sub> Se <sub>4</sub> Cl <sub>4</sub> | -5.93 | -7.24 | 1.32 | 2.44 |
| WAg <sub>2</sub> Te <sub>4</sub>                               | -3.61 | -4.93 | 1.32 | 2.05 |
| Cr <sub>4</sub> O <sub>10</sub>                                | -5.60 | -6.92 | 1.32 | 3.12 |
| WMo <sub>3</sub> Te <sub>8</sub>                               | -3.41 | -4.73 | 1.33 | 1.94 |
| PdPt <sub>3</sub> SeSCl <sub>6</sub>                           | -5.46 | -6.79 | 1.33 | 2.34 |
| Fe <sub>2</sub> S <sub>4</sub>                                 | -5.13 | -6.46 | 1.33 | 2.28 |
| Re <sub>4</sub> Te <sub>8</sub>                                | -3.46 | -4.79 | 1.33 | 1.95 |
| Ta <sub>2</sub> Ir <sub>2</sub> S <sub>8</sub>                 | -5.00 | -6.33 | 1.33 | 2.24 |
| Na <sub>4</sub> Ag <sub>4</sub> Se <sub>4</sub>                | -2.63 | -3.96 | 1.33 | 2.17 |
| CrW <sub>3</sub> Se <sub>8</sub>                               | -3.69 | -5.02 | 1.33 | 2.14 |
| SnSe <sub>2</sub>                                              | -5.12 | -6.46 | 1.33 | 2.32 |
| Hf <sub>2</sub> Br <sub>4</sub>                                | -3.10 | -4.44 | 1.33 | 2.41 |
| In <sub>2</sub> I <sub>2</sub>                                 | -4.39 | -5.72 | 1.34 | 2.19 |
| Au <sub>4</sub> S <sub>4</sub>                                 | -4.54 | -5.88 | 1.34 | 2.18 |
| Cu <sub>4</sub> Te <sub>4</sub> Cl <sub>4</sub>                | -5.63 | -6.96 | 1.34 | 2.39 |
| TiSeS                                                          | -4.97 | -6.31 | 1.34 | 2.26 |
| Ir <sub>2</sub> O <sub>2</sub> Br <sub>2</sub>                 | -3.65 | -4.99 | 1.34 | 2.55 |
| Au <sub>4</sub> S <sub>4</sub> I <sub>4</sub>                  | -5.17 | -6.51 | 1.34 | 2.23 |
| Hf <sub>4</sub> S <sub>2</sub> Se <sub>6</sub>                 | -4.67 | -6.01 | 1.34 | 2.23 |
| Sn <sub>2</sub> Se <sub>2</sub>                                | -3.29 | -4.63 | 1.35 | 2.24 |
| Rh <sub>2</sub> P <sub>2</sub> S <sub>6</sub>                  | -4.40 | -5.75 | 1.35 | 2.26 |
| Ni <sub>2</sub> SeS <sub>3</sub>                               | -4.95 | -6.30 | 1.35 | 2.31 |

---

---

|                                                                              |       |       |      |      |
|------------------------------------------------------------------------------|-------|-------|------|------|
| CrMo <sub>3</sub> O <sub>8</sub>                                             | -5.85 | -7.20 | 1.35 | 3.00 |
| Au <sub>2</sub> Te <sub>4</sub> I <sub>2</sub>                               | -4.26 | -5.61 | 1.35 | 2.13 |
| CrS <sub>2</sub>                                                             | -4.41 | -5.76 | 1.35 | 2.31 |
| Pd <sub>4</sub> I <sub>4</sub> Br <sub>4</sub>                               | -5.31 | -6.66 | 1.35 | 2.15 |
| HfBrCl                                                                       | -2.33 | -3.69 | 1.36 | 2.50 |
| BP                                                                           | -4.00 | -5.36 | 1.36 | 2.19 |
| Fe <sub>3</sub> Se <sub>6</sub>                                              | -4.87 | -6.23 | 1.36 | 2.18 |
| BiSeBr                                                                       | -5.42 | -6.78 | 1.36 | 2.45 |
| Ir <sub>2</sub> Ni <sub>2</sub> S <sub>8</sub>                               | -5.01 | -6.37 | 1.36 | 2.27 |
| Al <sub>2</sub> Ge <sub>2</sub> Te <sub>2</sub>                              | -3.67 | -5.03 | 1.37 | 2.00 |
| MoTe <sub>2</sub>                                                            | -3.44 | -4.81 | 1.37 | 1.94 |
| MgIn <sub>2</sub> Se <sub>4</sub>                                            | -4.42 | -5.80 | 1.38 | 2.28 |
| Os <sub>2</sub> Te <sub>4</sub>                                              | -3.57 | -4.95 | 1.38 | 1.93 |
| Sr <sub>4</sub> Bi <sub>4</sub> F <sub>4</sub> S <sub>8</sub>                | -4.38 | -5.76 | 1.38 | 2.27 |
| Os <sub>2</sub> S <sub>4</sub>                                               | -4.67 | -6.06 | 1.39 | 2.22 |
| Ga <sub>2</sub> Te <sub>5</sub>                                              | -3.89 | -5.28 | 1.39 | 2.11 |
| Os <sub>2</sub> Se <sub>4</sub>                                              | -4.07 | -5.46 | 1.39 | 2.11 |
| Ag <sub>4</sub> S <sub>6</sub>                                               | -4.21 | -5.60 | 1.39 | 2.31 |
| Co <sub>2</sub> O <sub>2</sub> F <sub>2</sub>                                | -6.84 | -8.23 | 1.39 | 3.14 |
| Ga <sub>2</sub> Al <sub>2</sub> Te <sub>6</sub>                              | -4.16 | -5.55 | 1.39 | 2.07 |
| TiCl <sub>2</sub>                                                            | -2.59 | -3.99 | 1.40 | 2.59 |
| In <sub>2</sub> P <sub>2</sub> S <sub>6</sub>                                | -4.46 | -5.86 | 1.40 | 2.46 |
| Ta <sub>3</sub> TeBr <sub>7</sub>                                            | -3.75 | -5.15 | 1.40 | 2.39 |
| ZrBrCl                                                                       | -2.48 | -3.87 | 1.40 | 2.51 |
| Cu <sub>2</sub> N <sub>2</sub> Cl <sub>2</sub> C <sub>6</sub> H <sub>8</sub> | -2.00 | -3.40 | 1.40 | 2.56 |
| Rh <sub>4</sub> S <sub>8</sub>                                               | -5.33 | -6.73 | 1.40 | 2.16 |
| GeS <sub>2</sub>                                                             | -5.57 | -6.97 | 1.41 | 2.50 |
| Ga <sub>2</sub> Te <sub>2</sub>                                              | -3.83 | -5.24 | 1.41 | 2.05 |
| Hf <sub>2</sub> Br <sub>2</sub> Cl <sub>2</sub>                              | -3.17 | -4.58 | 1.41 | 2.50 |

---

---

|                                              |       |       |      |      |
|----------------------------------------------|-------|-------|------|------|
| $\text{Na}_2\text{Ag}_2\text{Te}_2$          | -2.36 | -3.78 | 1.42 | 2.07 |
| $\text{Ag}_2\text{Te}_3$                     | -3.93 | -5.35 | 1.42 | 2.11 |
| $\text{Cu}_4\text{Se}_4\text{Br}_4$          | -5.99 | -7.41 | 1.42 | 2.39 |
| $\text{Pd}_4\text{Te}_4\text{P}_4$           | -4.42 | -5.84 | 1.42 | 1.91 |
| $\text{Bi}_2\text{GeSe}_2\text{I}_4$         | -4.83 | -6.25 | 1.42 | 2.31 |
| $\text{RhSeI}$                               | -4.21 | -5.63 | 1.43 | 2.05 |
| $\text{In}_2\text{Te}_2\text{I}_2$           | -4.34 | -5.76 | 1.43 | 2.19 |
| $\text{Au}_2\text{I}_2\text{S}_4$            | -4.79 | -6.22 | 1.43 | 2.31 |
| $\text{CrMo}_3\text{Se}_8$                   | -3.81 | -5.24 | 1.43 | 2.14 |
| $\text{In}_2\text{Se}_3$                     | -4.83 | -6.27 | 1.43 | 2.30 |
| $\text{HfGeS}_2\text{Br}_2$                  | -4.44 | -5.88 | 1.43 | 2.46 |
| $\text{Nb}_3\text{TeBr}_7$                   | -3.96 | -5.40 | 1.44 | 1.44 |
| $\text{Hf}_2\text{N}_2\text{I}_2$            | -3.68 | -5.12 | 1.44 | 2.42 |
| $\text{RuH}_2\text{O}_2$                     | -1.39 | -2.83 | 1.44 | 2.78 |
| $\text{Ir}_2\text{S}_2\text{F}_2$            | -5.91 | -7.35 | 1.44 | 2.77 |
| $\text{Au}_4\text{S}_4\text{Br}_4\text{F}_4$ | -5.55 | -6.99 | 1.44 | 2.77 |
| $\text{Nb}_3\text{OBr}_7$                    | -4.34 | -5.78 | 1.44 | 1.82 |
| $\text{Sc}_2\text{Te}_2\text{Cl}_2$          | -3.71 | -5.15 | 1.44 | 2.35 |
| $\text{Ag}_4\text{Te}_2$                     | -4.41 | -5.85 | 1.44 | 2.09 |
| $\text{W}_2\text{Cr}_2\text{S}_8$            | -4.29 | -5.73 | 1.44 | 2.28 |
| $\text{ZrNiF}_6$                             | -3.56 | -5.00 | 1.44 | 3.70 |
| $\text{Pd}_2\text{Se}_2\text{Cl}_4$          | -5.48 | -6.93 | 1.45 | 2.38 |
| $\text{Ta}_3\text{SeBr}_7$                   | -3.84 | -5.29 | 1.45 | 2.42 |
| $\text{Ti}_2\text{S}_6$                      | -4.18 | -5.63 | 1.45 | 2.40 |
| $\text{Cu}_4\text{Se}_4\text{Cl}_4$          | -6.17 | -7.63 | 1.45 | 2.45 |
| $\text{Nb}_4\text{O}_8$                      | -4.35 | -5.81 | 1.45 | 1.66 |
| $\text{Pt}_4\text{SeS}_3\text{I}_4$          | -4.34 | -5.79 | 1.46 | 2.13 |
| $\text{Hf}_2\text{Te}_2\text{O}_2$           | -3.79 | -5.25 | 1.46 | 2.59 |
| $\text{TiSe}_2$                              | -4.83 | -6.29 | 1.46 | 2.19 |

---

---

|                                                 |       |       |      |      |
|-------------------------------------------------|-------|-------|------|------|
| HfCl <sub>2</sub>                               | -2.41 | -3.88 | 1.47 | 2.58 |
| Pd <sub>2</sub> I <sub>4</sub>                  | -4.72 | -6.19 | 1.47 | 2.05 |
| NbInBr <sub>6</sub>                             | -4.52 | -6.00 | 1.47 | 2.07 |
| BiSI                                            | -5.21 | -6.69 | 1.47 | 2.37 |
| Hf <sub>2</sub> Cl <sub>4</sub>                 | -3.28 | -4.75 | 1.48 | 2.58 |
| SnSeS                                           | -5.10 | -6.58 | 1.48 | 2.39 |
| Al <sub>2</sub> Ge <sub>2</sub> Te <sub>6</sub> | -3.89 | -5.37 | 1.48 | 2.09 |
| Nb <sub>3</sub> SeBr <sub>7</sub>               | -4.08 | -5.55 | 1.48 | 1.42 |
| Au <sub>2</sub> Cl <sub>2</sub>                 | -5.63 | -7.11 | 1.48 | 2.32 |
| Ga <sub>8</sub> Te <sub>12</sub>                | -3.52 | -5.00 | 1.48 | 2.09 |
| Ge <sub>2</sub> Te <sub>2</sub>                 | -3.38 | -4.86 | 1.48 | 2.11 |
| Au <sub>4</sub> Se <sub>4</sub> I <sub>4</sub>  | -4.98 | -6.47 | 1.48 | 2.19 |
| Ta <sub>4</sub> O <sub>8</sub>                  | -4.19 | -5.68 | 1.49 | 3.09 |
| Ge <sub>2</sub> H <sub>2</sub>                  | -3.73 | -5.22 | 1.49 | 1.99 |
| SnS <sub>2</sub> Br <sub>2</sub>                | -5.49 | -6.98 | 1.49 | 2.57 |
| Si <sub>2</sub> F <sub>2</sub>                  | -5.50 | -6.99 | 1.49 | 3.50 |
| WTeSe                                           | -3.30 | -4.80 | 1.49 | 2.03 |
| Zr <sub>2</sub> P <sub>2</sub> S <sub>6</sub>   | -4.41 | -5.91 | 1.50 | 2.38 |
| Mg <sub>2</sub> In <sub>2</sub> Se <sub>5</sub> | -4.21 | -5.71 | 1.50 | 2.28 |
| ZrCl <sub>2</sub>                               | -2.57 | -4.07 | 1.50 | 2.59 |
| ZnGeSe <sub>2</sub> Br <sub>2</sub>             | -4.80 | -6.30 | 1.50 | 2.55 |
| BiSeCl                                          | -5.50 | -7.01 | 1.51 | 2.53 |
| Ag <sub>4</sub> S <sub>6</sub>                  | -4.82 | -6.32 | 1.51 | 2.31 |
| Ta <sub>3</sub> SBr <sub>7</sub>                | -3.89 | -5.40 | 1.51 | 2.44 |
| Ta <sub>3</sub> TeCl <sub>7</sub>               | -3.76 | -5.27 | 1.51 | 2.54 |
| P <sub>4</sub>                                  | -3.89 | -5.40 | 1.51 | 2.25 |
| HfSeS                                           | -4.62 | -6.13 | 1.51 | 2.26 |
| MoSeO                                           | -4.07 | -5.58 | 1.51 | 2.56 |
| ZrSeS                                           | -4.68 | -6.20 | 1.51 | 2.27 |

---

---

|                                                               |       |       |      |      |
|---------------------------------------------------------------|-------|-------|------|------|
| Bi <sub>2</sub> SeSCl <sub>2</sub>                            | -5.85 | -7.37 | 1.52 | 2.56 |
| Ir <sub>4</sub> S <sub>8</sub>                                | -4.88 | -6.40 | 1.52 | 2.20 |
| Sn <sub>2</sub> SeS                                           | -3.18 | -4.70 | 1.52 | 2.30 |
| Nb <sub>3</sub> SBr <sub>7</sub>                              | -4.15 | -5.68 | 1.53 | 1.75 |
| Cu <sub>4</sub> S <sub>4</sub> Br <sub>4</sub>                | -6.21 | -7.74 | 1.53 | 2.43 |
| Al <sub>4</sub> Te <sub>6</sub>                               | -4.14 | -5.67 | 1.53 | 2.06 |
| FeH <sub>2</sub> O <sub>2</sub>                               | -2.16 | -3.69 | 1.53 | 2.87 |
| InGaTe <sub>2</sub>                                           | -4.01 | -5.54 | 1.53 | 2.04 |
| Bi <sub>4</sub> S <sub>6</sub>                                | -4.41 | -5.95 | 1.54 | 2.43 |
| Ir <sub>4</sub> Se <sub>2</sub> S <sub>6</sub>                | -4.71 | -6.24 | 1.54 | 2.18 |
| CuGeTeBr                                                      | -3.95 | -5.49 | 1.54 | 2.30 |
| Au <sub>4</sub> S <sub>4</sub> Cl <sub>4</sub> F <sub>4</sub> | -5.73 | -7.27 | 1.54 | 2.82 |
| Pd <sub>2</sub> I <sub>2</sub> Br <sub>2</sub>                | -4.92 | -6.46 | 1.54 | 2.15 |
| Nb <sub>3</sub> TeCl <sub>7</sub>                             | -4.00 | -5.55 | 1.54 | 1.53 |
| Ga <sub>4</sub> Se <sub>6</sub>                               | -4.89 | -6.44 | 1.55 | 2.32 |
| Cu <sub>4</sub> S <sub>4</sub> Cl <sub>4</sub>                | -6.44 | -7.99 | 1.55 | 2.49 |
| V <sub>4</sub> O <sub>8</sub>                                 | -5.33 | -6.88 | 1.55 | 3.07 |
| Au <sub>3</sub> InO <sub>4</sub> Br <sub>4</sub>              | -5.58 | -7.13 | 1.56 | 2.66 |
| In <sub>2</sub> TeSI <sub>2</sub>                             | -3.88 | -5.44 | 1.56 | 2.28 |
| TiPdS <sub>2</sub>                                            | -4.03 | -5.59 | 1.56 | 2.05 |
| Ir <sub>4</sub> Se <sub>3</sub> S <sub>5</sub>                | -4.63 | -6.18 | 1.56 | 2.17 |
| Ge <sub>2</sub> Se <sub>2</sub>                               | -3.20 | -4.76 | 1.56 | 2.29 |
| Au <sub>2</sub> Se <sub>2</sub>                               | -4.41 | -5.97 | 1.56 | 2.13 |
| Ge <sub>6</sub> P <sub>8</sub>                                | -3.95 | -5.51 | 1.56 | 2.17 |
| InN                                                           | -4.05 | -5.62 | 1.57 | 2.70 |
| Ir <sub>2</sub> O <sub>2</sub> Cl <sub>2</sub>                | -3.93 | -5.50 | 1.57 | 2.62 |
| InGaP <sub>2</sub> Se <sub>2</sub> S <sub>4</sub>             | -4.18 | -5.74 | 1.57 | 2.42 |
| Ni <sub>2</sub> Te <sub>2</sub> S <sub>6</sub>                | -3.87 | -5.43 | 1.57 | 2.35 |
| Ir <sub>4</sub> Se <sub>8</sub>                               | -4.34 | -5.90 | 1.57 | 2.10 |

---

---

|                                                                             |       |       |      |      |
|-----------------------------------------------------------------------------|-------|-------|------|------|
| Ta <sub>3</sub> OCl <sub>7</sub>                                            | -4.08 | -5.65 | 1.57 | 2.68 |
| Bi <sub>2</sub> H <sub>2</sub> S <sub>4</sub>                               | -4.73 | -6.31 | 1.58 | 2.45 |
| Ta <sub>3</sub> SeCl <sub>7</sub>                                           | -3.86 | -5.44 | 1.58 | 2.56 |
| Ru <sub>2</sub> S <sub>4</sub>                                              | -4.83 | -6.41 | 1.58 | 2.18 |
| MoTeS                                                                       | -3.74 | -5.33 | 1.59 | 2.09 |
| In <sub>8</sub> Te <sub>12</sub>                                            | -3.54 | -5.12 | 1.59 | 2.07 |
| Au <sub>2</sub> Cl <sub>2</sub> Se <sub>4</sub>                             | -4.86 | -6.45 | 1.59 | 2.37 |
| Au <sub>2</sub> Te <sub>4</sub> Cl <sub>2</sub>                             | -4.34 | -5.93 | 1.59 | 2.26 |
| Nb <sub>3</sub> OCl <sub>7</sub>                                            | -4.43 | -6.02 | 1.59 | 1.92 |
| MoTeSe                                                                      | -3.50 | -5.09 | 1.59 | 2.03 |
| HfGeS <sub>2</sub> Cl <sub>2</sub>                                          | -4.61 | -6.21 | 1.59 | 2.55 |
| Ru <sub>2</sub> Se <sub>4</sub>                                             | -4.19 | -5.79 | 1.60 | 2.07 |
| Cu <sub>12</sub> S <sub>6</sub>                                             | -4.54 | -6.14 | 1.60 | 2.28 |
| Rb <sub>4</sub> O <sub>2</sub>                                              | -1.15 | -2.75 | 1.60 | 1.13 |
| BiSBr                                                                       | -5.49 | -7.09 | 1.60 | 2.51 |
| Nb <sub>3</sub> SeCl <sub>7</sub>                                           | -4.14 | -5.74 | 1.60 | 1.50 |
| AuBiP <sub>2</sub> Se <sub>6</sub>                                          | -4.52 | -6.13 | 1.60 | 2.29 |
| Hf <sub>2</sub> P <sub>2</sub> S <sub>6</sub>                               | -4.35 | -5.96 | 1.61 | 2.39 |
| Hf <sub>2</sub> Ti <sub>2</sub> Se <sub>8</sub>                             | -4.92 | -6.53 | 1.61 | 2.19 |
| Au <sub>2</sub> Br <sub>2</sub> S <sub>4</sub>                              | -5.05 | -6.66 | 1.61 | 2.38 |
| Hf <sub>2</sub> Sn <sub>2</sub> Se <sub>8</sub>                             | -3.69 | -5.31 | 1.61 | 2.25 |
| Sc <sub>2</sub> Te <sub>2</sub> Br <sub>2</sub>                             | -3.66 | -5.28 | 1.62 | 2.26 |
| Ba <sub>4</sub> Bi <sub>4</sub> F <sub>4</sub> Se <sub>8</sub>              | -4.30 | -5.92 | 1.62 | 2.13 |
| Au <sub>2</sub> Te <sub>4</sub> Br <sub>2</sub>                             | -4.32 | -5.94 | 1.62 | 2.21 |
| TiGeS <sub>2</sub> I <sub>2</sub>                                           | -3.81 | -5.43 | 1.62 | 2.32 |
| Re <sub>4</sub> Se <sub>8</sub>                                             | -3.74 | -5.36 | 1.62 | 2.12 |
| Cu <sub>2</sub> N <sub>2</sub> I <sub>2</sub> C <sub>6</sub> F <sub>8</sub> | -4.89 | -6.51 | 1.62 | 3.29 |
| PdAuSeCl                                                                    | -4.45 | -6.07 | 1.62 | 2.14 |
| Y <sub>2</sub> Te <sub>3</sub>                                              | -4.22 | -5.84 | 1.63 | 1.10 |

---

---

|                                       |       |       |      |      |
|---------------------------------------|-------|-------|------|------|
| $\text{Ga}_2\text{Se}_3$              | -3.86 | -5.48 | 1.63 | 2.32 |
| $\text{HfSe}_2$                       | -5.14 | -6.77 | 1.63 | 2.19 |
| $\text{Ti}_2\text{Te}_4\text{I}_4$    | -3.65 | -5.28 | 1.63 | 2.16 |
| $\text{Ga}_2\text{Ge}_2\text{Se}_6$   | -4.56 | -6.19 | 1.63 | 2.32 |
| $\text{Au}_3\text{InIBr}_3\text{O}_4$ | -5.35 | -6.99 | 1.63 | 2.63 |
| $\text{Zr}_2\text{Sn}_2\text{Se}_8$   | -3.68 | -5.31 | 1.64 | 2.25 |
| $\text{Ta}_2\text{O}_2\text{I}_4$     | -3.67 | -5.31 | 1.64 | 2.52 |
| $\text{Ag}_4\text{F}_8$               | -7.15 | -8.79 | 1.64 | 3.31 |
| $\text{Na}_2\text{Nb}_2\text{I}_{12}$ | -4.55 | -6.19 | 1.64 | 1.88 |
| $\text{Ta}_3\text{SCl}_7$             | -3.93 | -5.57 | 1.64 | 2.58 |
| $\text{Au}_2\text{Br}_6$              | -5.46 | -7.11 | 1.64 | 2.44 |
| $\text{HfSeS}$                        | -5.28 | -6.92 | 1.65 | 2.26 |
| $\text{Cu}_4\text{S}_4\text{F}_4$     | -6.28 | -7.93 | 1.65 | 2.90 |
| $\text{Ta}_2\text{Se}_4\text{Cl}_4$   | -3.71 | -5.35 | 1.65 | 2.50 |
| $\text{AuInSI}_2$                     | -4.49 | -6.14 | 1.65 | 2.24 |
| $\text{In}_2\text{Te}_5$              | -3.72 | -5.37 | 1.65 | 2.10 |
| $\text{MoO}_2$                        | -5.33 | -6.98 | 1.65 | 2.98 |
| $\text{Ag}_4\text{Br}_{12}$           | -5.16 | -6.81 | 1.65 | 2.48 |
| $\text{Nb}_3\text{SCl}_7$             | -4.23 | -5.89 | 1.65 | 1.51 |
| $\text{Hf}_2\text{Te}_4\text{I}_4$    | -3.80 | -5.46 | 1.66 | 2.16 |
| $\text{Pt}_2\text{Br}_2$              | -4.18 | -5.84 | 1.66 | 2.12 |
| $\text{Rh}_2\text{S}_2\text{I}_2$     | -4.07 | -5.73 | 1.67 | 2.10 |
| $\text{Re}_6\text{I}_2\text{Se}_8$    | -4.76 | -6.42 | 1.67 | 2.09 |
| $\text{In}_4\text{Te}_4\text{I}_4$    | -4.40 | -6.07 | 1.67 | 2.19 |
| $\text{Au}_4\text{Te}_4\text{I}_4$    | -4.64 | -6.32 | 1.67 | 2.12 |
| $\text{Al}_2\text{Si}_2\text{Te}_6$   | -3.78 | -5.45 | 1.67 | 2.08 |
| $\text{Sn}_2\text{Te}_2$              | -3.25 | -4.92 | 1.67 | 2.05 |
| $\text{Au}_2\text{Br}_2\text{S}_4$    | -5.26 | -6.94 | 1.68 | 2.38 |
| $\text{Co}_4\text{O}_4\text{Br}_4$    | -4.46 | -6.14 | 1.68 | 2.63 |

---

---

|                                                 |       |       |      |      |
|-------------------------------------------------|-------|-------|------|------|
| WTeS                                            | -3.50 | -5.18 | 1.68 | 2.09 |
| PdS <sub>2</sub>                                | -5.03 | -6.72 | 1.68 | 2.15 |
| Hf <sub>2</sub> CO <sub>2</sub>                 | -4.16 | -5.84 | 1.68 | 2.81 |
| Zr <sub>2</sub> Te <sub>4</sub> I <sub>4</sub>  | -3.83 | -5.51 | 1.68 | 2.16 |
| Li <sub>2</sub> Nb <sub>2</sub> I <sub>12</sub> | -4.52 | -6.21 | 1.69 | 1.88 |
| Pt <sub>4</sub> In <sub>2</sub> Se <sub>6</sub> | -3.88 | -5.56 | 1.69 | 2.03 |
| ZrHf <sub>3</sub> Se <sub>8</sub>               | -5.11 | -6.80 | 1.69 | 2.19 |
| V <sub>2</sub> Se <sub>4</sub> Cl <sub>4</sub>  | -3.68 | -5.37 | 1.69 | 2.50 |
| Au <sub>4</sub> Cu <sub>4</sub> Se <sub>4</sub> | -4.33 | -6.03 | 1.69 | 2.14 |
| AgGaP <sub>2</sub> Se <sub>6</sub>              | -4.33 | -6.02 | 1.69 | 2.31 |
| Ta <sub>2</sub> O <sub>2</sub> Br <sub>4</sub>  | -4.06 | -5.76 | 1.70 | 2.72 |
| Zr <sub>2</sub> Te <sub>4</sub> Cl <sub>4</sub> | -3.89 | -5.59 | 1.70 | 2.42 |
| Ta <sub>3</sub> TeF <sub>7</sub>                | -3.46 | -5.16 | 1.70 | 3.53 |
| Ta <sub>2</sub> O <sub>2</sub> Cl <sub>4</sub>  | -4.36 | -6.07 | 1.70 | 2.83 |
| Au <sub>6</sub> I <sub>6</sub>                  | -3.93 | -5.63 | 1.70 | 2.12 |
| Ni <sub>2</sub> Te <sub>4</sub>                 | -4.15 | -5.86 | 1.70 | 2.10 |
| Al <sub>2</sub> B <sub>2</sub> S <sub>6</sub>   | -5.24 | -6.94 | 1.70 | 2.46 |
| AgInP <sub>2</sub> Se <sub>6</sub>              | -4.29 | -6.00 | 1.71 | 2.31 |
| Ta <sub>2</sub> Se <sub>4</sub> I <sub>4</sub>  | -3.59 | -5.30 | 1.71 | 2.25 |
| Hf <sub>2</sub> Zr <sub>2</sub> Se <sub>8</sub> | -5.09 | -6.81 | 1.72 | 2.19 |
| K <sub>2</sub> Nb <sub>2</sub> I <sub>12</sub>  | -4.58 | -6.29 | 1.72 | 1.61 |
| NaCoP <sub>2</sub> Se <sub>6</sub>              | -4.67 | -6.39 | 1.72 | 2.29 |
| Rb <sub>2</sub> K <sub>2</sub> O <sub>2</sub>   | -1.14 | -2.85 | 1.72 | 1.09 |
| Nb <sub>3</sub> TeF <sub>7</sub>                | -3.76 | -5.48 | 1.72 | 2.14 |
| Al <sub>2</sub> Si <sub>2</sub> S <sub>2</sub>  | -3.38 | -5.10 | 1.72 | 2.21 |
| Zr <sub>2</sub> S <sub>4</sub>                  | -4.65 | -6.37 | 1.72 | 2.33 |
| Hf <sub>2</sub> Te <sub>4</sub> Br <sub>4</sub> | -3.86 | -5.58 | 1.72 | 2.32 |
| Ta <sub>2</sub> Se <sub>4</sub> Br <sub>4</sub> | -3.65 | -5.37 | 1.73 | 2.40 |
| Zr <sub>2</sub> CO <sub>2</sub>                 | -4.01 | -5.74 | 1.73 | 2.80 |

---

---

|                                                 |       |       |      |      |
|-------------------------------------------------|-------|-------|------|------|
| WSe <sub>2</sub>                                | -3.26 | -4.99 | 1.73 | 2.12 |
| WMo <sub>3</sub> O <sub>8</sub>                 | -5.19 | -6.92 | 1.73 | 2.99 |
| In <sub>4</sub> Se <sub>6</sub>                 | -4.98 | -6.71 | 1.73 | 2.30 |
| Pt <sub>2</sub> Te <sub>2</sub> S <sub>6</sub>  | -3.65 | -5.38 | 1.73 | 2.27 |
| Ta <sub>3</sub> SeF <sub>7</sub>                | -3.57 | -5.30 | 1.74 | 3.56 |
| AuAgBr <sub>4</sub>                             | -5.47 | -7.20 | 1.74 | 2.39 |
| Sc <sub>2</sub> CBr <sub>2</sub>                | -4.19 | -5.93 | 1.74 | 2.37 |
| Bi <sub>8</sub> O <sub>4</sub> Se <sub>8</sub>  | -3.90 | -5.63 | 1.74 | 2.60 |
| Au <sub>2</sub> Cl <sub>2</sub> Se <sub>4</sub> | -4.96 | -6.70 | 1.74 | 2.37 |
| Cu <sub>4</sub> Te <sub>2</sub> O <sub>12</sub> | -7.66 | -9.40 | 1.74 | 3.03 |
| BiSeBr                                          | -5.24 | -6.98 | 1.74 | 2.45 |
| Pt <sub>2</sub> I <sub>4</sub>                  | -4.14 | -5.88 | 1.74 | 2.09 |
| Pd <sub>2</sub> Te <sub>4</sub>                 | -3.88 | -5.62 | 1.74 | 1.90 |
| BiSCl                                           | -5.64 | -7.38 | 1.75 | 2.59 |
| In <sub>2</sub> Se <sub>2</sub> Cl <sub>2</sub> | -4.98 | -6.73 | 1.75 | 2.54 |
| MoW <sub>3</sub> Se <sub>8</sub>                | -3.32 | -5.07 | 1.75 | 2.12 |
| Ir <sub>2</sub> S <sub>2</sub> I <sub>2</sub>   | -3.67 | -5.42 | 1.75 | 2.14 |
| W <sub>2</sub> Mo <sub>2</sub> Se <sub>8</sub>  | -3.41 | -5.16 | 1.75 | 2.12 |
| Sc <sub>2</sub> Te <sub>2</sub> I <sub>2</sub>  | -3.57 | -5.33 | 1.75 | 2.11 |
| SnSe <sub>2</sub>                               | -4.27 | -6.02 | 1.75 | 2.32 |
| Ta <sub>2</sub> I <sub>2</sub> O <sub>4</sub>   | -4.31 | -6.07 | 1.76 | 2.88 |
| Hf <sub>2</sub> Ge <sub>2</sub> Se <sub>8</sub> | -3.67 | -5.43 | 1.76 | 2.26 |
| Sn <sub>2</sub> N <sub>2</sub> I <sub>2</sub>   | -4.49 | -6.25 | 1.76 | 2.55 |
| FeGa <sub>2</sub> Se <sub>4</sub>               | -3.70 | -5.46 | 1.76 | 2.22 |
| Mo <sub>2</sub> Cl <sub>2</sub> O <sub>4</sub>  | -4.72 | -6.48 | 1.76 | 2.96 |
| Sc <sub>2</sub> P <sub>2</sub> S <sub>6</sub>   | -3.70 | -5.46 | 1.76 | 2.42 |
| Y <sub>2</sub> CCl <sub>2</sub>                 | -4.46 | -6.23 | 1.76 | 1.57 |
| Ge <sub>2</sub> SeS                             | -3.13 | -4.90 | 1.77 | 2.35 |
| Rb <sub>2</sub> K <sub>2</sub> O <sub>2</sub>   | -1.27 | -3.04 | 1.77 | 1.09 |

---

---

|                                                                              |       |       |      |      |
|------------------------------------------------------------------------------|-------|-------|------|------|
| InP                                                                          | -3.83 | -5.61 | 1.77 | 2.09 |
| Zr <sub>2</sub> Ge <sub>2</sub> Se <sub>8</sub>                              | -3.68 | -5.46 | 1.78 | 2.26 |
| Ga <sub>2</sub> SeSiCl                                                       | -4.55 | -6.33 | 1.78 | 2.47 |
| TiSO                                                                         | -3.70 | -5.47 | 1.78 | 2.74 |
| Rb <sub>2</sub> Au <sub>2</sub> S <sub>2</sub>                               | -1.49 | -3.27 | 1.78 | 1.49 |
| WMo <sub>3</sub> Se <sub>8</sub>                                             | -3.45 | -5.23 | 1.79 | 2.13 |
| Zr <sub>2</sub> Si <sub>2</sub> Se <sub>8</sub>                              | -3.60 | -5.39 | 1.79 | 2.26 |
| PtPd <sub>3</sub> O <sub>4</sub> Cl <sub>4</sub>                             | -5.50 | -7.29 | 1.79 | 2.56 |
| PdS <sub>2</sub>                                                             | -4.31 | -6.10 | 1.79 | 2.15 |
| Pd <sub>2</sub> F <sub>6</sub>                                               | -8.17 | -9.97 | 1.79 | 3.43 |
| Zr <sub>2</sub> Te <sub>4</sub> Br <sub>4</sub>                              | -3.83 | -5.62 | 1.80 | 2.32 |
| Ta <sub>3</sub> SF <sub>7</sub>                                              | -3.65 | -5.45 | 1.80 | 3.57 |
| Pd <sub>2</sub> Te <sub>2</sub> O <sub>6</sub>                               | -3.57 | -5.37 | 1.80 | 2.84 |
| AgGaP <sub>2</sub> S <sub>2</sub> Se <sub>4</sub>                            | -4.32 | -6.12 | 1.80 | 2.35 |
| Ag <sub>4</sub> Te <sub>2</sub> O <sub>12</sub>                              | -7.26 | -9.06 | 1.80 | 2.99 |
| Al <sub>2</sub> Te <sub>5</sub>                                              | -3.48 | -5.29 | 1.80 | 2.09 |
| MoSe <sub>2</sub>                                                            | -3.51 | -5.31 | 1.80 | 2.13 |
| Nb <sub>3</sub> SeF <sub>7</sub>                                             | -3.91 | -5.71 | 1.81 | 2.13 |
| ScTeCl                                                                       | -3.34 | -5.14 | 1.81 | 2.35 |
| Ga <sub>2</sub> Si <sub>2</sub> S <sub>2</sub>                               | -4.14 | -5.94 | 1.81 | 2.25 |
| Sc <sub>2</sub> Se <sub>4</sub> I <sub>4</sub>                               | -4.50 | -6.31 | 1.81 | 2.30 |
| Rb <sub>2</sub> C <sub>2</sub> Se <sub>2</sub> H <sub>6</sub> S <sub>6</sub> | -3.25 | -5.06 | 1.81 | 1.28 |
| CoTeBr                                                                       | -4.20 | -6.01 | 1.81 | 2.22 |
| Nb <sub>2</sub> Se <sub>4</sub> I <sub>4</sub>                               | -3.64 | -5.45 | 1.81 | 1.75 |
| V <sub>2</sub> Se <sub>4</sub> Br <sub>4</sub>                               | -3.61 | -5.42 | 1.81 | 2.41 |
| Si <sub>2</sub> Se <sub>2</sub>                                              | -3.57 | -5.39 | 1.81 | 2.26 |
| Pd <sub>2</sub> Te <sub>2</sub> S <sub>6</sub>                               | -3.67 | -5.49 | 1.82 | 2.24 |
| IrTeI                                                                        | -3.41 | -5.23 | 1.82 | 2.01 |
| Nb <sub>2</sub> Se <sub>4</sub> Cl <sub>4</sub>                              | -3.71 | -5.53 | 1.82 | 2.14 |

---

---

|                                                          |       |       |      |      |
|----------------------------------------------------------|-------|-------|------|------|
| $\text{In}_2\text{S}_2\text{I}_2$                        | -4.61 | -6.44 | 1.83 | 2.37 |
| $\text{Pt}_4\text{S}_3\text{Se}_5$                       | -4.32 | -6.15 | 1.83 | 2.14 |
| $\text{K}_2\text{Os}_2\text{C}_2\text{O}_2\text{F}_{10}$ | -6.44 | -8.28 | 1.83 | 3.22 |
| $\text{MoSO}$                                            | -4.30 | -6.13 | 1.83 | 2.62 |
| $\text{Li}_4\text{Ag}_4\text{Te}_4$                      | -2.67 | -4.50 | 1.83 | 2.07 |
| $\text{In}_2\text{IBrSe}_2$                              | -4.79 | -6.62 | 1.83 | 2.38 |
| $\text{K}_4\text{O}_2$                                   | -1.13 | -2.96 | 1.83 | 1.00 |
| $\text{Ge}_4\text{Te}_4\text{P}_4$                       | -3.68 | -5.51 | 1.84 | 2.16 |
| $\text{Ga}_2\text{Te}_2$                                 | -3.69 | -5.53 | 1.84 | 2.05 |
| $\text{Nb}_2\text{Se}_4\text{F}_4$                       | -3.59 | -5.42 | 1.84 | 2.62 |
| $\text{W}_2\text{Mo}_2\text{O}_8$                        | -5.02 | -6.86 | 1.84 | 2.99 |
| $\text{Ga}_2\text{Si}_2\text{Te}_2$                      | -3.47 | -5.31 | 1.85 | 2.01 |
| $\text{Nb}_2\text{O}_2\text{I}_4$                        | -3.66 | -5.50 | 1.85 | 1.78 |
| $\text{Te}_2\text{H}_2\text{P}_2\text{S}_{10}$           | -4.87 | -6.72 | 1.85 | 2.50 |
| $\text{Bi}_2\text{O}_2\text{I}_2$                        | -4.89 | -6.74 | 1.85 | 2.76 |
| $\text{Al}_2\text{O}_2$                                  | -3.53 | -5.38 | 1.85 | 3.16 |
| $\text{NaCoP}_2\text{S}_6$                               | -5.03 | -6.88 | 1.85 | 2.41 |
| $\text{Re}_6\text{Br}_2\text{Se}_8$                      | -4.80 | -6.66 | 1.86 | 2.13 |
| $\text{Ir}_2\text{Se}_2\text{I}_2$                       | -3.54 | -5.40 | 1.86 | 2.10 |
| $\text{V}_2\text{IO}_2\text{Br}_3$                       | -3.80 | -5.66 | 1.86 | 2.66 |
| $\text{In}_2\text{Se}_2\text{I}_2$                       | -4.66 | -6.52 | 1.86 | 2.31 |
| $\text{Au}_4\text{Te}_4\text{Br}_4$                      | -4.80 | -6.66 | 1.86 | 2.23 |
| $\text{Ga}_2\text{Te}_2$                                 | -3.67 | -5.53 | 1.86 | 2.05 |
| $\text{Nb}_2\text{Se}_4\text{Br}_4$                      | -3.67 | -5.54 | 1.87 | 1.87 |
| $\text{Sc}_2\text{S}_4\text{I}_4$                        | -4.60 | -6.47 | 1.87 | 2.37 |
| $\text{Nb}_3\text{SF}_7$                                 | -4.01 | -5.88 | 1.87 | 2.09 |
| $\text{In}_2\text{S}_2\text{F}_2$                        | -5.16 | -7.04 | 1.87 | 3.23 |
| $\text{Co}_2\text{I}_6$                                  | -4.16 | -6.04 | 1.88 | 2.22 |
| $\text{In}_2\text{Ge}_2\text{Se}_6$                      | -4.51 | -6.39 | 1.88 | 2.31 |

---

---

|                                                               |       |       |      |      |
|---------------------------------------------------------------|-------|-------|------|------|
| ZrNiSeS                                                       | -3.94 | -5.83 | 1.88 | 2.16 |
| K <sub>4</sub> Se <sub>4</sub> S <sub>8</sub>                 | -3.62 | -5.50 | 1.88 | 1.90 |
| Ga <sub>2</sub> I <sub>6</sub>                                | -4.56 | -6.45 | 1.88 | 2.32 |
| WAgSeBr <sub>5</sub>                                          | -4.96 | -6.85 | 1.89 | 2.43 |
| In <sub>2</sub> Se <sub>2</sub> Br <sub>2</sub>               | -4.77 | -6.66 | 1.89 | 2.46 |
| ZnSnCl <sub>2</sub> I <sub>4</sub>                            | -4.98 | -6.87 | 1.89 | 2.52 |
| Ag <sub>2</sub> Te <sub>4</sub> I <sub>2</sub>                | -4.17 | -6.05 | 1.89 | 2.18 |
| ScInSeSI <sub>2</sub>                                         | -4.55 | -6.45 | 1.89 | 2.30 |
| Re <sub>6</sub> Cl <sub>2</sub> Se <sub>8</sub>               | -4.81 | -6.71 | 1.90 | 2.16 |
| Au <sub>4</sub> H <sub>4</sub> S <sub>4</sub> Br <sub>4</sub> | -5.38 | -7.27 | 1.90 | 2.33 |
| In <sub>2</sub> Se <sub>2</sub> I <sub>2</sub>                | -4.66 | -6.57 | 1.90 | 2.31 |
| Ni <sub>4</sub> I <sub>8</sub>                                | -4.79 | -6.69 | 1.91 | 2.22 |
| In <sub>2</sub> H <sub>2</sub> Se <sub>4</sub>                | -4.05 | -5.96 | 1.91 | 2.32 |
| Sc <sub>2</sub> CCl <sub>2</sub>                              | -4.40 | -6.31 | 1.91 | 2.49 |
| WSeS                                                          | -3.44 | -5.35 | 1.91 | 2.19 |
| In <sub>2</sub> S <sub>2</sub> I <sub>2</sub>                 | -4.40 | -6.31 | 1.91 | 2.37 |
| Au <sub>2</sub> Cl <sub>2</sub> S <sub>4</sub>                | -5.28 | -7.19 | 1.91 | 2.43 |
| Re <sub>6</sub> I <sub>2</sub> S <sub>8</sub>                 | -4.76 | -6.68 | 1.92 | 2.17 |
| K <sub>4</sub> O <sub>2</sub>                                 | -1.22 | -3.14 | 1.92 | 1.00 |
| Nb <sub>2</sub> O <sub>2</sub> Br <sub>4</sub>                | -4.03 | -5.95 | 1.92 | 1.61 |
| Au <sub>4</sub> Te <sub>4</sub> Cl <sub>4</sub>               | -4.88 | -6.80 | 1.92 | 2.29 |
| HfZrPd <sub>2</sub> S <sub>4</sub> I <sub>4</sub>             | -4.43 | -6.36 | 1.93 | 2.17 |
| Au <sub>2</sub> SeO <sub>4</sub>                              | -4.66 | -6.58 | 1.93 | 2.81 |
| Na <sub>2</sub> Ta <sub>2</sub> I <sub>12</sub>               | -4.38 | -6.31 | 1.93 | 2.26 |
| Zr <sub>2</sub> Sn <sub>2</sub> S <sub>8</sub>                | -3.86 | -5.80 | 1.94 | 2.39 |
| In <sub>6</sub> I <sub>6</sub>                                | -3.41 | -5.35 | 1.94 | 2.20 |
| Si <sub>4</sub> Te <sub>8</sub>                               | -3.46 | -5.40 | 1.94 | 2.11 |
| Ge <sub>2</sub> IClO <sub>3</sub>                             | -4.15 | -6.10 | 1.95 | 3.05 |
| MoSeS                                                         | -3.72 | -5.66 | 1.95 | 2.19 |

---

---

|                                                   |       |       |      |      |
|---------------------------------------------------|-------|-------|------|------|
| OsH <sub>2</sub> O <sub>2</sub>                   | -1.28 | -3.23 | 1.95 | 2.82 |
| Nb <sub>2</sub> O <sub>2</sub> Cl <sub>4</sub>    | -4.31 | -6.26 | 1.95 | 1.78 |
| Zr <sub>2</sub> Ge <sub>2</sub> S <sub>8</sub>    | -3.90 | -5.86 | 1.95 | 2.40 |
| P <sub>2</sub> Se <sub>5</sub>                    | -3.79 | -5.74 | 1.96 | 2.38 |
| Si <sub>4</sub> Se <sub>8</sub>                   | -3.54 | -5.49 | 1.96 | 2.35 |
| Ag <sub>6</sub> I <sub>12</sub>                   | -4.57 | -6.53 | 1.96 | 2.23 |
| Re <sub>6</sub> F <sub>2</sub> Se <sub>8</sub>    | -4.66 | -6.62 | 1.96 | 2.35 |
| MoW <sub>3</sub> O <sub>8</sub>                   | -4.84 | -6.80 | 1.96 | 2.99 |
| Li <sub>2</sub> Ta <sub>2</sub> I <sub>12</sub>   | -4.36 | -6.32 | 1.96 | 2.26 |
| Pd <sub>4</sub> P <sub>4</sub> Se <sub>4</sub>    | -4.34 | -6.31 | 1.96 | 2.00 |
| In <sub>2</sub> Se <sub>2</sub>                   | -4.39 | -6.35 | 1.96 | 2.23 |
| In <sub>8</sub> BrClS <sub>4</sub> I <sub>6</sub> | -4.37 | -6.33 | 1.97 | 2.37 |
| Rh <sub>2</sub> I <sub>6</sub>                    | -4.10 | -6.06 | 1.97 | 2.12 |
| Y <sub>2</sub> CF <sub>2</sub>                    | -2.75 | -4.72 | 1.97 | 2.22 |
| Ni <sub>3</sub> P <sub>2</sub> Se <sub>8</sub>    | -4.80 | -6.78 | 1.98 | 2.27 |
| V <sub>2</sub> ClO <sub>2</sub> Br <sub>3</sub>   | -3.93 | -5.91 | 1.98 | 2.73 |
| Hf <sub>2</sub> Sn <sub>2</sub> S <sub>8</sub>    | -3.83 | -5.81 | 1.98 | 2.39 |
| AgBiP <sub>2</sub> Se <sub>6</sub>                | -4.24 | -6.22 | 1.98 | 2.31 |
| BiSBr                                             | -5.32 | -7.30 | 1.98 | 2.51 |
| BiSeF                                             | -4.83 | -6.81 | 1.98 | 3.09 |
| Na <sub>4</sub> Au <sub>4</sub> Se <sub>4</sub>   | -2.29 | -4.28 | 1.98 | 2.08 |
| In <sub>3</sub> I <sub>3</sub>                    | -3.24 | -5.23 | 1.98 | 2.20 |
| MgAl <sub>2</sub> Se <sub>4</sub>                 | -3.44 | -5.42 | 1.98 | 2.27 |
| Sn <sub>2</sub> S <sub>2</sub>                    | -3.04 | -5.02 | 1.99 | 2.36 |
| Ag <sub>2</sub> F <sub>2</sub> S <sub>4</sub>     | -4.98 | -6.97 | 1.99 | 2.80 |
| Au <sub>4</sub> Se <sub>4</sub> Br <sub>4</sub>   | -5.18 | -7.17 | 1.99 | 2.29 |
| BiSeCl                                            | -5.31 | -7.30 | 1.99 | 2.53 |
| GeTe                                              | -3.28 | -5.27 | 1.99 | 2.10 |
| Au <sub>4</sub> S <sub>4</sub> Br <sub>4</sub>    | -5.40 | -7.40 | 2.00 | 2.33 |

---

---

|                                                 |       |       |      |      |
|-------------------------------------------------|-------|-------|------|------|
| Pt <sub>2</sub> Te <sub>4</sub>                 | -3.63 | -5.63 | 2.00 | 1.93 |
| Ga <sub>2</sub> Se <sub>2</sub> I <sub>2</sub>  | -4.19 | -6.19 | 2.00 | 2.32 |
| WSeO                                            | -3.50 | -5.50 | 2.00 | 2.56 |
| RhGaO <sub>2</sub> Cl <sub>2</sub>              | -4.61 | -6.61 | 2.00 | 2.77 |
| LiCoP <sub>2</sub> Se <sub>6</sub>              | -4.36 | -6.36 | 2.00 | 2.30 |
| Hf <sub>2</sub> Ge <sub>2</sub> S <sub>8</sub>  | -3.84 | -5.84 | 2.01 | 2.40 |
| Sc <sub>2</sub> CH <sub>2</sub>                 | -3.40 | -5.41 | 2.01 | 1.77 |
| Au <sub>2</sub> S <sub>2</sub>                  | -4.53 | -6.54 | 2.01 | 2.18 |
| Rb <sub>2</sub> Li <sub>2</sub> Se <sub>2</sub> | -0.83 | -2.84 | 2.01 | 1.10 |
| Pd <sub>2</sub> Br <sub>4</sub>                 | -5.02 | -7.03 | 2.01 | 2.25 |
| SrHOI                                           | -2.85 | -4.86 | 2.02 | 1.77 |
| PtSeS                                           | -4.34 | -6.36 | 2.02 | 2.15 |
| Pd <sub>4</sub> I <sub>8</sub>                  | -4.67 | -6.69 | 2.02 | 2.05 |
| Ni <sub>4</sub> P <sub>4</sub> Se <sub>4</sub>  | -4.67 | -6.69 | 2.02 | 2.19 |
| Sc <sub>2</sub> Se <sub>4</sub> Br <sub>4</sub> | -4.46 | -6.48 | 2.02 | 2.46 |
| Mg <sub>2</sub> Al <sub>2</sub> Se <sub>5</sub> | -3.37 | -5.40 | 2.02 | 2.27 |
| Ga <sub>2</sub> Si <sub>2</sub> Se <sub>6</sub> | -4.29 | -6.32 | 2.03 | 2.32 |
| Si <sub>2</sub> Cl <sub>2</sub>                 | -4.30 | -6.33 | 2.03 | 2.58 |
| Ti <sub>2</sub> Se <sub>4</sub> I <sub>4</sub>  | -3.87 | -5.90 | 2.03 | 2.27 |
| Al <sub>4</sub> Se <sub>6</sub>                 | -4.47 | -6.50 | 2.03 | 2.28 |
| In <sub>2</sub> Se <sub>3</sub>                 | -4.31 | -6.35 | 2.04 | 2.30 |
| Y <sub>2</sub> Se <sub>4</sub> Br <sub>4</sub>  | -4.61 | -6.65 | 2.04 | 1.73 |
| Ge <sub>4</sub> P <sub>8</sub>                  | -3.95 | -5.99 | 2.04 | 2.19 |
| Pd <sub>2</sub> Se <sub>4</sub>                 | -4.04 | -6.09 | 2.05 | 2.06 |
| CuInP <sub>2</sub> Se <sub>6</sub>              | -4.41 | -6.47 | 2.05 | 2.33 |
| Cs <sub>2</sub> Na <sub>2</sub> Te <sub>2</sub> | -0.89 | -2.94 | 2.05 | 0.99 |
| K <sub>2</sub> Ta <sub>2</sub> I <sub>12</sub>  | -4.41 | -6.46 | 2.05 | 1.74 |
| In <sub>2</sub> Te <sub>2</sub> I <sub>2</sub>  | -4.34 | -6.39 | 2.05 | 2.19 |
| In <sub>2</sub> Se <sub>2</sub>                 | -4.31 | -6.37 | 2.06 | 2.23 |

---

---

|                                                                              |       |       |      |      |
|------------------------------------------------------------------------------|-------|-------|------|------|
| Ag <sub>2</sub> Te <sub>4</sub> Br <sub>2</sub>                              | -4.16 | -6.22 | 2.06 | 2.26 |
| WS <sub>2</sub>                                                              | -3.61 | -5.67 | 2.06 | 2.25 |
| CuBiP <sub>2</sub> Se <sub>6</sub>                                           | -4.30 | -6.36 | 2.06 | 2.33 |
| W <sub>2</sub> Mo <sub>2</sub> S <sub>8</sub>                                | -3.77 | -5.83 | 2.06 | 2.25 |
| Ag <sub>2</sub> I <sub>2</sub> Br <sub>4</sub>                               | -4.81 | -6.88 | 2.06 | 2.41 |
| MoW <sub>3</sub> S <sub>8</sub>                                              | -3.69 | -5.75 | 2.06 | 2.25 |
| Ir <sub>2</sub> S <sub>2</sub> Br <sub>2</sub>                               | -3.94 | -6.01 | 2.07 | 2.25 |
| Ir <sub>2</sub> Se <sub>2</sub> Br <sub>2</sub>                              | -3.81 | -5.88 | 2.07 | 2.20 |
| Sc <sub>2</sub> CF <sub>2</sub>                                              | -3.29 | -5.36 | 2.07 | 3.32 |
| Ag <sub>4</sub> Se <sub>2</sub>                                              | -4.25 | -6.32 | 2.07 | 2.15 |
| WMo <sub>3</sub> S <sub>8</sub>                                              | -3.83 | -5.91 | 2.08 | 2.25 |
| Ga <sub>2</sub> Si <sub>2</sub> Se <sub>2</sub>                              | -3.86 | -5.93 | 2.08 | 2.15 |
| SiSe <sub>2</sub>                                                            | -3.35 | -5.43 | 2.08 | 2.35 |
| In <sub>8</sub> Se <sub>12</sub>                                             | -3.98 | -6.06 | 2.08 | 2.30 |
| Ti <sub>2</sub> N <sub>2</sub> Br <sub>2</sub>                               | -4.68 | -6.76 | 2.08 | 2.55 |
| Al <sub>2</sub> Te <sub>2</sub>                                              | -3.05 | -5.14 | 2.09 | 2.04 |
| Rb <sub>2</sub> Li <sub>2</sub> S <sub>2</sub>                               | -0.77 | -2.86 | 2.09 | 1.18 |
| Zr <sub>2</sub> GeOI <sub>2</sub> Br <sub>2</sub> Se <sub>3</sub>            | -4.93 | -7.02 | 2.09 | 2.46 |
| SnTe                                                                         | -3.23 | -5.32 | 2.09 | 2.05 |
| Cs <sub>4</sub> S <sub>2</sub>                                               | -0.85 | -2.93 | 2.09 | 0.84 |
| Pd <sub>4</sub> P <sub>4</sub> S <sub>4</sub>                                | -4.46 | -6.55 | 2.09 | 2.05 |
| Ti <sub>2</sub> N <sub>2</sub> Cl <sub>2</sub>                               | -4.89 | -6.99 | 2.09 | 2.63 |
| Cu <sub>2</sub> N <sub>2</sub> Br <sub>2</sub> C <sub>6</sub> F <sub>8</sub> | -4.97 | -7.06 | 2.09 | 3.33 |
| Au <sub>4</sub> H <sub>4</sub> S <sub>4</sub> Cl <sub>4</sub>                | -5.51 | -7.60 | 2.10 | 2.38 |
| TiF <sub>2</sub>                                                             | -2.95 | -5.04 | 2.10 | 3.68 |
| Ge <sub>2</sub> P <sub>2</sub> S <sub>6</sub>                                | -4.06 | -6.16 | 2.10 | 2.47 |
| WO <sub>2</sub>                                                              | -4.64 | -6.74 | 2.10 | 2.99 |
| Ag <sub>2</sub> Te <sub>4</sub> Cl <sub>2</sub>                              | -4.13 | -6.23 | 2.10 | 2.30 |
| Re <sub>4</sub> O <sub>8</sub>                                               | -5.07 | -7.17 | 2.10 | 2.94 |

---

---

|                                               |       |       |      |      |
|-----------------------------------------------|-------|-------|------|------|
| $\text{Cu}_2\text{I}_2\text{Se}_4$            | -4.62 | -6.72 | 2.10 | 2.32 |
| $\text{Ir}_2\text{S}_2\text{F}_2$             | -4.32 | -6.43 | 2.10 | 2.77 |
| $\text{Al}_2\text{Si}_2\text{Te}_2$           | -3.15 | -5.26 | 2.11 | 1.98 |
| $\text{AuInF}_4$                              | -4.87 | -6.98 | 2.11 | 3.52 |
| $\text{Bi}_2\text{I}_6$                       | -4.74 | -6.84 | 2.11 | 2.31 |
| $\text{Hf}_2\text{S}_6$                       | -4.41 | -6.52 | 2.11 | 2.41 |
| $\text{In}_2\text{Si}_2\text{Se}_6$           | -4.31 | -6.43 | 2.11 | 2.31 |
| $\text{Rh}_2\text{Te}_2\text{F}_2$            | -4.19 | -6.31 | 2.12 | 2.61 |
| $\text{In}_4\text{O}_4\text{Br}_4$            | -5.68 | -7.79 | 2.12 | 2.94 |
| $\text{HfTi}_3\text{S}_8$                     | -5.23 | -7.35 | 2.12 | 2.33 |
| $\text{Ti}_2\text{BrClN}_2$                   | -4.77 | -6.88 | 2.12 | 2.59 |
| $\text{Pt}_2\text{Br}_4$                      | -4.35 | -6.47 | 2.12 | 2.29 |
| $\text{PtSnS}_4$                              | -4.63 | -6.75 | 2.12 | 2.31 |
| $\text{Ir}_2\text{BrClS}_2$                   | -3.97 | -6.10 | 2.13 | 2.28 |
| $\text{ZrHf}_3\text{S}_8$                     | -4.78 | -6.91 | 2.13 | 2.34 |
| $\text{ZrHf}_3\text{S}_8$                     | -5.39 | -7.53 | 2.13 | 2.34 |
| $\text{Rh}_2\text{S}_2\text{Br}_2$            | -4.42 | -6.55 | 2.14 | 2.21 |
| $\text{Pd}_2\text{Br}_2\text{F}_2$            | -5.36 | -7.50 | 2.14 | 2.72 |
| $\text{MgIn}_2\text{S}_4$                     | -4.35 | -6.49 | 2.14 | 2.43 |
| $\text{Si}_2\text{S}_2$                       | -3.64 | -5.78 | 2.14 | 2.39 |
| $\text{Bi}_2\text{Br}_6$                      | -5.44 | -7.58 | 2.14 | 2.59 |
| $\text{Rh}_2\text{Se}_2\text{Br}_2$           | -4.27 | -6.41 | 2.14 | 2.16 |
| $\text{Cs}_2\text{Na}_2\text{Se}_2$           | -0.83 | -2.97 | 2.14 | 1.10 |
| $\text{ZrNbSeIS}_2\text{Br}_2$                | -4.66 | -6.80 | 2.14 | 2.04 |
| $\text{HfS}_2$                                | -4.74 | -6.89 | 2.15 | 2.34 |
| $\text{Hf}_2\text{Zr}_2\text{S}_8$            | -5.37 | -7.52 | 2.15 | 2.34 |
| $\text{In}_2\text{Si}_2\text{Se}_2$           | -3.89 | -6.04 | 2.15 | 2.13 |
| $\text{MgGa}_2\text{S}_4$                     | -4.08 | -6.23 | 2.15 | 2.44 |
| $\text{Ag}_2\text{Te}_3\text{Br}_2\text{P}_4$ | -4.20 | -6.35 | 2.15 | 2.26 |

---

---

|                                                                |       |       |      |      |
|----------------------------------------------------------------|-------|-------|------|------|
| CoSeBr                                                         | -4.24 | -6.39 | 2.15 | 2.29 |
| Zr <sub>2</sub> S <sub>4</sub>                                 | -5.32 | -7.48 | 2.15 | 2.33 |
| Sc <sub>2</sub> P <sub>2</sub> Se <sub>8</sub>                 | -4.22 | -6.38 | 2.15 | 2.31 |
| Sc <sub>2</sub> Se <sub>2</sub> F <sub>2</sub>                 | -3.14 | -5.30 | 2.16 | 3.08 |
| TiZr <sub>3</sub> S <sub>8</sub>                               | -5.24 | -7.40 | 2.16 | 2.33 |
| Ga <sub>2</sub> Te <sub>2</sub> I <sub>2</sub>                 | -4.01 | -6.17 | 2.16 | 2.20 |
| HfZr <sub>3</sub> S <sub>8</sub>                               | -5.35 | -7.50 | 2.16 | 2.33 |
| Pt <sub>2</sub> F <sub>2</sub>                                 | -5.62 | -7.78 | 2.17 | 2.79 |
| Cu <sub>2</sub> Te <sub>4</sub> I <sub>2</sub>                 | -4.13 | -6.29 | 2.17 | 2.22 |
| ZrS <sub>2</sub>                                               | -4.81 | -6.97 | 2.17 | 2.34 |
| Au <sub>2</sub> I <sub>2</sub> Se <sub>3</sub> P <sub>4</sub>  | -3.81 | -5.98 | 2.17 | 2.23 |
| Ir <sub>2</sub> Se <sub>2</sub> F <sub>2</sub>                 | -4.03 | -6.20 | 2.17 | 2.72 |
| Ni <sub>4</sub> P <sub>4</sub> S <sub>4</sub>                  | -4.64 | -6.82 | 2.17 | 2.24 |
| V <sub>2</sub> S <sub>4</sub> Br <sub>4</sub>                  | -3.68 | -5.85 | 2.17 | 2.47 |
| Ni <sub>4</sub> Br <sub>8</sub>                                | -5.09 | -7.26 | 2.17 | 2.41 |
| Rh <sub>2</sub> S <sub>2</sub> F <sub>2</sub>                  | -4.76 | -6.93 | 2.18 | 2.72 |
| Sn <sub>2</sub> I <sub>4</sub>                                 | -3.70 | -5.88 | 2.18 | 2.27 |
| Pd <sub>2</sub> Se <sub>2</sub> O <sub>6</sub>                 | -4.07 | -6.26 | 2.18 | 2.87 |
| Ni <sub>2</sub> Se <sub>4</sub>                                | -4.26 | -6.45 | 2.18 | 2.24 |
| AlSeI                                                          | -3.96 | -6.15 | 2.19 | 2.29 |
| Al <sub>2</sub> Si <sub>2</sub> Se <sub>2</sub>                | -3.27 | -5.46 | 2.19 | 2.12 |
| Pt <sub>2</sub> Se <sub>2</sub> O <sub>6</sub>                 | -3.22 | -5.41 | 2.19 | 2.90 |
| Ti <sub>2</sub> S <sub>2</sub> O <sub>2</sub>                  | -4.56 | -6.75 | 2.19 | 2.75 |
| LiGaP <sub>2</sub> Se <sub>6</sub>                             | -4.24 | -6.43 | 2.19 | 2.35 |
| Pd <sub>2</sub> F <sub>2</sub>                                 | -6.80 | -8.99 | 2.19 | 2.73 |
| Al <sub>2</sub> IBrS <sub>2</sub>                              | -3.84 | -6.04 | 2.19 | 2.44 |
| Zr <sub>2</sub> S <sub>6</sub>                                 | -4.33 | -6.54 | 2.20 | 2.40 |
| Ag <sub>2</sub> Te <sub>3</sub> Cl <sub>2</sub> P <sub>4</sub> | -4.18 | -6.38 | 2.20 | 2.30 |
| Cu <sub>2</sub> Br <sub>2</sub> S <sub>4</sub>                 | -5.19 | -7.39 | 2.20 | 2.47 |

---

---

|                                     |       |       |      |      |
|-------------------------------------|-------|-------|------|------|
| $\text{Ir}_2\text{S}_2\text{Cl}_2$  | -4.02 | -6.22 | 2.20 | 2.32 |
| $\text{In}_2\text{Si}_2\text{S}_2$  | -4.21 | -6.42 | 2.21 | 2.23 |
| $\text{OsI}_2$                      | -2.66 | -4.87 | 2.21 | 2.10 |
| $\text{In}_3\text{F}_3$             | -3.02 | -5.23 | 2.21 | 3.60 |
| $\text{Pt}_4\text{I}_8$             | -3.99 | -6.21 | 2.21 | 2.09 |
| $\text{Bi}_8\text{O}_4\text{S}_8$   | -3.75 | -5.96 | 2.21 | 2.68 |
| $\text{Zr}_2\text{Br}_2\text{S}_3$  | -5.04 | -7.26 | 2.22 | 2.42 |
| $\text{AuBiP}_2\text{S}_6$          | -4.39 | -6.60 | 2.22 | 2.40 |
| $\text{Sc}_2\text{Te}_2\text{I}_2$  | -3.28 | -5.50 | 2.22 | 2.11 |
| $\text{SiS}_2$                      | -4.81 | -7.03 | 2.22 | 2.49 |
| $\text{SnO}$                        | -4.10 | -6.32 | 2.22 | 3.04 |
| $\text{TiSe}_2$                     | -4.17 | -6.39 | 2.22 | 2.19 |
| $\text{Sn}_2\text{Se}_2$            | -3.22 | -5.45 | 2.22 | 2.24 |
| $\text{Ni}_2\text{Te}_2\text{O}_6$  | -3.47 | -5.69 | 2.22 | 2.95 |
| $\text{Zn}_2\text{P}_2\text{Se}_6$  | -3.90 | -6.12 | 2.22 | 2.47 |
| $\text{Ag}_2\text{I}_2\text{S}_4$   | -4.31 | -6.54 | 2.22 | 2.35 |
| $\text{Al}_2\text{Se}_2\text{Cl}_2$ | -3.53 | -5.76 | 2.23 | 2.54 |
| $\text{Ga}_2\text{S}_2\text{Cl}_2$  | -4.78 | -7.01 | 2.23 | 2.62 |
| $\text{Au}_4\text{Se}_4\text{Cl}_4$ | -5.27 | -7.50 | 2.23 | 2.35 |
| $\text{Ni}_2\text{S}_4$             | -4.38 | -6.61 | 2.23 | 2.33 |
| $\text{Pt}_2\text{Cl}_2$            | -4.41 | -6.64 | 2.23 | 2.21 |
| $\text{Au}_6\text{I}_6$             | -3.61 | -5.85 | 2.23 | 2.12 |
| $\text{V}_2\text{S}_4\text{Cl}_4$   | -3.65 | -5.88 | 2.23 | 2.57 |
| $\text{Ir}_2\text{Se}_2\text{Cl}_2$ | -3.82 | -6.06 | 2.24 | 2.27 |
| $\text{Si}_4\text{Te}_4\text{P}_4$  | -3.22 | -5.46 | 2.24 | 2.15 |
| $\text{Al}_2\text{Se}_2\text{I}_2$  | -3.93 | -6.17 | 2.24 | 2.29 |
| $\text{Ag}_2\text{Br}_2\text{S}_4$  | -4.79 | -7.03 | 2.24 | 2.42 |
| $\text{Zr}_2\text{Se}_4\text{I}_4$  | -3.92 | -6.16 | 2.24 | 2.27 |
| $\text{ZrOBr}_2$                    | -4.53 | -6.78 | 2.25 | 2.77 |

---

---

|                                                 |       |        |      |      |
|-------------------------------------------------|-------|--------|------|------|
| Mg <sub>2</sub> Ga <sub>2</sub> S <sub>5</sub>  | -3.94 | -6.19  | 2.25 | 2.44 |
| Sn <sub>2</sub> N <sub>2</sub> Br <sub>2</sub>  | -4.77 | -7.02  | 2.25 | 2.70 |
| In <sub>2</sub> Se <sub>2</sub>                 | -3.54 | -5.80  | 2.25 | 2.23 |
| BiSF                                            | -5.08 | -7.33  | 2.26 | 3.15 |
| Pt <sub>2</sub> Br <sub>2</sub> Cl <sub>2</sub> | -4.42 | -6.68  | 2.26 | 2.35 |
| IrSeBr                                          | -3.47 | -5.73  | 2.26 | 2.21 |
| WSO                                             | -3.73 | -5.99  | 2.26 | 2.62 |
| Ta <sub>2</sub> S <sub>4</sub> I <sub>4</sub>   | -3.34 | -5.60  | 2.26 | 2.31 |
| Cu <sub>4</sub> O <sub>4</sub> F <sub>4</sub>   | -8.13 | -10.39 | 2.26 | 3.16 |
| Ga <sub>2</sub> Se <sub>2</sub>                 | -3.48 | -5.73  | 2.26 | 2.26 |
| Ag <sub>2</sub> Br <sub>2</sub> Se <sub>4</sub> | -4.57 | -6.83  | 2.26 | 2.36 |
| Ga <sub>2</sub> S <sub>2</sub> Br <sub>2</sub>  | -4.73 | -6.99  | 2.27 | 2.54 |
| Ti <sub>2</sub> Se <sub>4</sub> Br <sub>4</sub> | -3.83 | -6.10  | 2.27 | 2.43 |
| Mg <sub>2</sub> In <sub>2</sub> S <sub>5</sub>  | -4.10 | -6.37  | 2.27 | 2.42 |
| Rh <sub>2</sub> S <sub>2</sub> Cl <sub>2</sub>  | -4.52 | -6.79  | 2.27 | 2.27 |
| Cu <sub>2</sub> F <sub>2</sub> Se <sub>4</sub>  | -4.68 | -6.95  | 2.27 | 2.78 |
| Re <sub>6</sub> Br <sub>2</sub> S <sub>8</sub>  | -4.87 | -7.14  | 2.27 | 2.22 |
| BiSCl                                           | -5.42 | -7.69  | 2.27 | 2.59 |
| Rh <sub>2</sub> Se <sub>2</sub> Cl <sub>2</sub> | -4.31 | -6.58  | 2.27 | 2.22 |
| TaAgGeCl <sub>2</sub> S <sub>4</sub>            | -4.74 | -7.01  | 2.27 | 2.45 |
| In <sub>2</sub> S <sub>2</sub> I <sub>2</sub>   | -4.43 | -6.71  | 2.28 | 2.37 |
| Nb <sub>2</sub> S <sub>4</sub> I <sub>4</sub>   | -3.49 | -5.78  | 2.28 | 1.77 |
| AgGaP <sub>2</sub> S <sub>6</sub>               | -4.32 | -6.61  | 2.29 | 2.42 |
| In <sub>2</sub> Se <sub>5</sub>                 | -3.63 | -5.92  | 2.29 | 2.34 |
| Ag <sub>6</sub> I <sub>8</sub>                  | -4.24 | -6.53  | 2.29 | 2.20 |
| Li <sub>4</sub> P <sub>4</sub> S <sub>8</sub>   | -3.89 | -6.18  | 2.29 | 2.47 |
| Ga <sub>2</sub> Se <sub>2</sub> Br <sub>2</sub> | -4.43 | -6.73  | 2.29 | 2.47 |
| Pd <sub>2</sub> S <sub>2</sub> O <sub>6</sub>   | -4.80 | -7.10  | 2.29 | 2.90 |
| Nb <sub>2</sub> I <sub>2</sub> O <sub>4</sub>   | -3.95 | -6.24  | 2.30 | 2.12 |

---

---

|                                                                              |       |       |      |      |
|------------------------------------------------------------------------------|-------|-------|------|------|
| Pt <sub>2</sub> Se <sub>4</sub>                                              | -3.77 | -6.07 | 2.30 | 2.11 |
| In <sub>4</sub> SiClBr <sub>2</sub> Se <sub>3</sub>                          | -4.79 | -7.09 | 2.30 | 2.46 |
| Si <sub>4</sub> P <sub>8</sub>                                               | -3.87 | -6.16 | 2.30 | 2.19 |
| Cu <sub>2</sub> Te <sub>4</sub> Br <sub>2</sub>                              | -4.14 | -6.44 | 2.30 | 2.30 |
| Cu <sub>2</sub> I <sub>2</sub> Se <sub>3</sub> P <sub>4</sub>                | -4.16 | -6.46 | 2.30 | 2.30 |
| Li <sub>2</sub> V <sub>2</sub> Au <sub>4</sub> O <sub>12</sub>               | -5.18 | -7.48 | 2.30 | 2.89 |
| RuI <sub>2</sub>                                                             | -3.08 | -5.38 | 2.30 | 2.06 |
| Pt <sub>4</sub> In <sub>2</sub> S <sub>6</sub>                               | -3.58 | -5.89 | 2.31 | 2.12 |
| Cu <sub>2</sub> N <sub>2</sub> Cl <sub>2</sub> C <sub>6</sub> F <sub>8</sub> | -5.01 | -7.31 | 2.31 | 3.35 |
| Cu <sub>2</sub> Te <sub>4</sub> Cl <sub>2</sub>                              | -4.15 | -6.46 | 2.31 | 2.34 |
| FeGa <sub>2</sub> S <sub>4</sub>                                             | -3.32 | -5.63 | 2.31 | 2.34 |
| Ba <sub>2</sub> Bi <sub>4</sub> S <sub>8</sub>                               | -3.31 | -5.62 | 2.31 | 1.49 |
| Re <sub>6</sub> Cl <sub>2</sub> S <sub>8</sub>                               | -4.93 | -7.25 | 2.32 | 2.24 |
| Al <sub>2</sub> Se <sub>2</sub> Br <sub>2</sub>                              | -3.63 | -5.96 | 2.32 | 2.44 |
| Cu <sub>6</sub> Cl <sub>6</sub>                                              | -4.80 | -7.12 | 2.32 | 2.46 |
| Pt <sub>2</sub> S <sub>2</sub> O <sub>6</sub>                                | -3.71 | -6.03 | 2.32 | 2.93 |
| Ti <sub>2</sub> Se <sub>4</sub> Cl <sub>4</sub>                              | -3.78 | -6.10 | 2.33 | 2.52 |
| Au <sub>4</sub> Br <sub>4</sub>                                              | -4.16 | -6.49 | 2.33 | 2.25 |
| Ta <sub>2</sub> S <sub>4</sub> F <sub>4</sub>                                | -3.35 | -5.68 | 2.33 | 3.21 |
| Ti <sub>2</sub> N <sub>2</sub> F <sub>2</sub>                                | -4.68 | -7.00 | 2.33 | 3.25 |
| Ga <sub>2</sub> Ge <sub>2</sub> S <sub>6</sub>                               | -4.35 | -6.68 | 2.33 | 2.46 |
| Au <sub>2</sub> Ag <sub>2</sub> Cl <sub>8</sub>                              | -5.63 | -7.96 | 2.33 | 2.50 |
| Hf <sub>2</sub> Br <sub>2</sub> S <sub>3</sub>                               | -4.93 | -7.27 | 2.34 | 2.43 |
| FeAl <sub>2</sub> Se <sub>4</sub>                                            | -2.74 | -5.08 | 2.34 | 2.20 |
| AgAlP <sub>2</sub> Se <sub>6</sub>                                           | -3.77 | -6.11 | 2.34 | 2.30 |
| Hf <sub>2</sub> Se <sub>4</sub> I <sub>4</sub>                               | -3.77 | -6.12 | 2.35 | 2.27 |
| W <sub>2</sub> O <sub>4</sub> Br <sub>4</sub>                                | -5.24 | -7.59 | 2.35 | 2.87 |
| Au <sub>4</sub> S <sub>4</sub> Cl <sub>4</sub>                               | -5.53 | -7.88 | 2.35 | 2.39 |
| In <sub>4</sub> Br <sub>4</sub>                                              | -3.22 | -5.57 | 2.35 | 2.45 |

---

---

|                                                               |       |       |      |      |
|---------------------------------------------------------------|-------|-------|------|------|
| AgGaI <sub>2</sub>                                            | -3.47 | -5.83 | 2.35 | 2.20 |
| In <sub>2</sub> S <sub>2</sub>                                | -4.49 | -6.84 | 2.35 | 2.37 |
| Ba <sub>4</sub> Bi <sub>4</sub> F <sub>4</sub> S <sub>8</sub> | -3.80 | -6.16 | 2.35 | 2.16 |
| Al <sub>2</sub> Se <sub>2</sub>                               | -3.23 | -5.59 | 2.36 | 2.24 |
| FeAl <sub>2</sub> S <sub>4</sub>                              | -2.83 | -5.19 | 2.36 | 2.32 |
| SnS <sub>2</sub>                                              | -5.02 | -7.38 | 2.36 | 2.47 |
| Al <sub>2</sub> Te <sub>2</sub>                               | -3.30 | -5.66 | 2.36 | 2.04 |
| Cu <sub>2</sub> Cl <sub>2</sub> S <sub>4</sub>                | -5.22 | -7.58 | 2.36 | 2.51 |
| Li <sub>2</sub> Au <sub>2</sub> Se <sub>2</sub>               | -3.76 | -6.12 | 2.36 | 2.07 |
| AgInP <sub>2</sub> S <sub>6</sub>                             | -4.27 | -6.64 | 2.37 | 2.42 |
| IrCoClBr <sub>5</sub>                                         | -4.38 | -6.75 | 2.37 | 2.44 |
| GaP                                                           | -3.43 | -5.80 | 2.37 | 2.12 |
| Pd <sub>4</sub> Br <sub>8</sub>                               | -4.95 | -7.32 | 2.37 | 2.25 |
| Ga <sub>2</sub> Se <sub>2</sub>                               | -3.87 | -6.24 | 2.37 | 2.26 |
| Sn <sub>2</sub> N <sub>2</sub> Cl <sub>2</sub>                | -4.97 | -7.34 | 2.37 | 2.79 |
| Ge <sub>2</sub> S <sub>2</sub>                                | -3.13 | -5.51 | 2.37 | 2.41 |
| Bi <sub>4</sub> B <sub>4</sub> S <sub>12</sub>                | -3.88 | -6.26 | 2.38 | 2.46 |
| Re <sub>6</sub> F <sub>2</sub> S <sub>8</sub>                 | -4.88 | -7.26 | 2.38 | 2.43 |
| HfPdIClBr <sub>4</sub>                                        | -4.91 | -7.29 | 2.39 | 2.41 |
| Pd <sub>3</sub> P <sub>2</sub> Se <sub>8</sub>                | -4.37 | -6.75 | 2.39 | 2.13 |
| Ga <sub>2</sub> S <sub>3</sub>                                | -3.77 | -6.16 | 2.39 | 2.46 |
| Sc <sub>2</sub> S <sub>4</sub> Cl <sub>4</sub>                | -4.56 | -6.95 | 2.39 | 2.63 |
| Sc <sub>2</sub> S <sub>4</sub> Br <sub>4</sub>                | -4.58 | -6.97 | 2.39 | 2.54 |
| LiCoP <sub>2</sub> S <sub>6</sub>                             | -4.59 | -6.98 | 2.40 | 2.41 |
| In <sub>2</sub> I <sub>6</sub>                                | -4.32 | -6.72 | 2.40 | 2.31 |
| Sr <sub>4</sub> P <sub>4</sub> F <sub>4</sub> Se <sub>8</sub> | -3.84 | -6.23 | 2.40 | 2.27 |
| Au <sub>4</sub> O <sub>4</sub> F <sub>4</sub>                 | -6.65 | -9.05 | 2.40 | 3.06 |
| K <sub>2</sub> Li <sub>2</sub> S <sub>2</sub>                 | -0.78 | -3.18 | 2.40 | 2.32 |
| Ta <sub>2</sub> S <sub>4</sub> Br <sub>4</sub>                | -3.32 | -5.73 | 2.40 | 2.47 |

---

---

|                                     |       |       |      |      |
|-------------------------------------|-------|-------|------|------|
| $\text{Al}_2\text{Ge}_2\text{Se}_6$ | -3.96 | -6.37 | 2.41 | 2.30 |
| $\text{NaGaP}_2\text{Se}_6$         | -4.08 | -6.49 | 2.41 | 2.35 |
| $\text{Li}_2\text{Cu}_2\text{Se}_2$ | -2.24 | -4.65 | 2.42 | 2.24 |
| $\text{Ag}_2\text{Cl}_2\text{Se}_4$ | -4.60 | -7.02 | 2.42 | 2.41 |
| $\text{Ta}_2\text{S}_4\text{Cl}_4$  | -3.34 | -5.76 | 2.42 | 2.56 |
| $\text{Ga}_2\text{O}_2$             | -5.38 | -7.80 | 2.42 | 3.16 |
| $\text{Cu}_2\text{Cl}_2\text{Se}_4$ | -4.75 | -7.17 | 2.42 | 2.45 |
| $\text{OsBr}_2$                     | -2.63 | -5.06 | 2.42 | 2.31 |
| $\text{In}_2\text{Al}_2\text{Se}_6$ | -4.08 | -6.50 | 2.42 | 2.29 |
| $\text{Y}_2\text{S}_4\text{Cl}_4$   | -4.68 | -7.11 | 2.43 | 1.94 |
| $\text{Sn}_4\text{S}_4$             | -2.90 | -5.33 | 2.43 | 2.36 |
| $\text{In}_2\text{Ge}_2\text{S}_6$  | -4.46 | -6.89 | 2.43 | 2.45 |
| $\text{Y}_2\text{Se}_2\text{F}_2$   | -4.42 | -6.85 | 2.43 | 2.09 |
| $\text{In}_2\text{S}_2$             | -4.43 | -6.86 | 2.43 | 2.37 |
| $\text{Ga}_4\text{Te}_4\text{I}_4$  | -3.82 | -6.25 | 2.43 | 2.20 |
| $\text{Ge}_4\text{P}_4\text{Se}_4$  | -3.75 | -6.18 | 2.43 | 2.28 |
| $\text{Al}_2\text{S}_2\text{I}_2$   | -3.63 | -6.07 | 2.43 | 2.37 |
| $\text{GeS}_2$                      | -3.99 | -6.43 | 2.43 | 2.50 |
| $\text{Pt}_4\text{P}_4\text{Se}_4$  | -3.85 | -6.29 | 2.44 | 2.04 |
| $\text{Ge}_2\text{Se}_2$            | -3.24 | -5.67 | 2.44 | 2.29 |
| $\text{Ga}_2\text{ICl}$             | -2.60 | -5.04 | 2.44 | 2.42 |
| $\text{Al}_2\text{S}_2\text{I}_2$   | -4.05 | -6.49 | 2.44 | 2.37 |
| $\text{Al}_8\text{Te}_{12}$         | -2.89 | -5.34 | 2.44 | 2.06 |
| $\text{Ag}_2\text{F}_2\text{Se}_4$  | -4.16 | -6.60 | 2.44 | 2.74 |
| $\text{Y}_2\text{S}_4\text{Br}_4$   | -4.67 | -7.11 | 2.44 | 1.77 |
| $\text{In}_4\text{Te}_4\text{I}_4$  | -3.96 | -6.40 | 2.44 | 2.19 |
| $\text{PdPt}_3\text{O}_8$           | -5.68 | -8.13 | 2.45 | 2.78 |
| $\text{Ir}_2\text{I}_6$             | -3.44 | -5.89 | 2.45 | 2.15 |
| $\text{Zr}_2\text{Se}_4\text{Br}_4$ | -3.86 | -6.31 | 2.45 | 2.43 |

---

---

|                                                                              |       |       |      |      |
|------------------------------------------------------------------------------|-------|-------|------|------|
| LiInP <sub>2</sub> Se <sub>6</sub>                                           | -4.02 | -6.47 | 2.45 | 2.35 |
| Al <sub>4</sub> Se <sub>6</sub>                                              | -3.26 | -5.72 | 2.46 | 2.28 |
| Nb <sub>2</sub> S <sub>4</sub> Br <sub>4</sub>                               | -3.48 | -5.94 | 2.47 | 1.58 |
| Au <sub>4</sub> Te <sub>2</sub> O <sub>12</sub>                              | -6.33 | -8.79 | 2.47 | 2.96 |
| Ga <sub>2</sub> O <sub>2</sub>                                               | -5.32 | -7.80 | 2.47 | 3.16 |
| In <sub>2</sub> Te <sub>2</sub> Br <sub>2</sub>                              | -4.51 | -6.98 | 2.47 | 2.34 |
| Co <sub>2</sub> F <sub>2</sub> O <sub>4</sub>                                | -6.52 | -9.00 | 2.47 | 3.22 |
| Ti <sub>2</sub> S <sub>4</sub> Br <sub>4</sub>                               | -4.08 | -6.56 | 2.48 | 2.50 |
| PtS <sub>2</sub>                                                             | -4.39 | -6.87 | 2.49 | 2.20 |
| Ge <sub>2</sub> S <sub>2</sub>                                               | -3.28 | -5.76 | 2.49 | 2.41 |
| SnI <sub>2</sub>                                                             | -3.83 | -6.32 | 2.49 | 2.28 |
| Nb <sub>2</sub> S <sub>4</sub> F <sub>4</sub>                                | -3.38 | -5.87 | 2.50 | 2.69 |
| Ag <sub>6</sub> I <sub>6</sub>                                               | -3.73 | -6.22 | 2.50 | 2.18 |
| Cu <sub>2</sub> N <sub>2</sub> I <sub>2</sub> C <sub>6</sub> H <sub>8</sub>  | -3.27 | -5.77 | 2.50 | 2.46 |
| SnI <sub>2</sub>                                                             | -3.79 | -6.30 | 2.50 | 2.28 |
| IrSCl                                                                        | -3.70 | -6.20 | 2.51 | 2.32 |
| Be <sub>4</sub> Te <sub>4</sub>                                              | -2.44 | -4.95 | 2.51 | 2.03 |
| Ga <sub>2</sub> Se <sub>2</sub>                                              | -3.76 | -6.26 | 2.51 | 2.26 |
| ZrSe <sub>2</sub>                                                            | -4.08 | -6.59 | 2.51 | 2.19 |
| SnS <sub>2</sub>                                                             | -4.37 | -6.88 | 2.51 | 2.47 |
| Pd <sub>2</sub> Te <sub>2</sub> O <sub>6</sub>                               | -3.50 | -6.01 | 2.51 | 2.84 |
| In <sub>4</sub> S <sub>6</sub>                                               | -4.75 | -7.26 | 2.51 | 2.44 |
| Zr <sub>2</sub> S <sub>4</sub> I <sub>4</sub>                                | -4.05 | -6.56 | 2.51 | 2.34 |
| Sn <sub>2</sub> S <sub>2</sub>                                               | -2.99 | -5.51 | 2.52 | 2.36 |
| Hf <sub>2</sub> Se <sub>4</sub> Br <sub>4</sub>                              | -3.75 | -6.27 | 2.52 | 2.43 |
| Ti <sub>2</sub> S <sub>4</sub> Cl <sub>4</sub>                               | -4.06 | -6.58 | 2.52 | 2.59 |
| ZnGeSBr <sub>2</sub>                                                         | -4.04 | -6.57 | 2.52 | 2.59 |
| Nb <sub>2</sub> S <sub>4</sub> Cl <sub>4</sub>                               | -3.45 | -5.98 | 2.53 | 2.17 |
| Cu <sub>2</sub> N <sub>2</sub> Br <sub>2</sub> H <sub>4</sub> C <sub>4</sub> | -3.56 | -6.09 | 2.53 | 2.53 |

---

---

|                                                                |       |       |      |      |
|----------------------------------------------------------------|-------|-------|------|------|
| Ag <sub>4</sub> S <sub>6</sub>                                 | -3.28 | -5.81 | 2.53 | 2.31 |
| Pt <sub>4</sub> Br <sub>8</sub>                                | -4.21 | -6.75 | 2.54 | 2.29 |
| Hf <sub>2</sub> Se <sub>4</sub> Cl <sub>4</sub>                | -3.79 | -6.32 | 2.54 | 2.53 |
| Ge <sub>2</sub> N <sub>2</sub> Br <sub>2</sub>                 | -4.66 | -7.20 | 2.54 | 2.73 |
| Zr <sub>2</sub> Se <sub>4</sub> Cl <sub>4</sub>                | -3.82 | -6.36 | 2.54 | 2.53 |
| K <sub>2</sub> Au <sub>2</sub> Se <sub>2</sub>                 | -1.39 | -3.93 | 2.54 | 1.44 |
| RuBr <sub>2</sub>                                              | -3.11 | -5.65 | 2.54 | 2.28 |
| Ba <sub>4</sub> P <sub>4</sub> F <sub>4</sub> Se <sub>8</sub>  | -3.75 | -6.30 | 2.55 | 2.18 |
| Ni <sub>2</sub> Se <sub>2</sub> O <sub>6</sub>                 | -3.83 | -6.39 | 2.55 | 2.98 |
| Cu <sub>2</sub> Br <sub>2</sub> Se <sub>3</sub> P <sub>4</sub> | -4.28 | -6.83 | 2.56 | 2.36 |
| In <sub>2</sub> S <sub>5</sub>                                 | -3.65 | -6.20 | 2.56 | 2.49 |
| Zn <sub>2</sub> Te <sub>2</sub> N <sub>4</sub> H <sub>8</sub>  | -0.79 | -3.36 | 2.57 | 2.63 |
| InGaS <sub>2</sub>                                             | -4.29 | -6.86 | 2.57 | 2.38 |
| Ga <sub>4</sub> S <sub>6</sub>                                 | -4.68 | -7.25 | 2.57 | 2.46 |
| FeAl <sub>2</sub> S <sub>4</sub>                               | -2.57 | -5.14 | 2.58 | 2.32 |
| In <sub>4</sub> S <sub>6</sub>                                 | -4.83 | -7.41 | 2.58 | 2.44 |
| AuInS <sub>2</sub> Cl <sub>2</sub>                             | -4.91 | -7.50 | 2.58 | 2.48 |
| Au <sub>2</sub> I <sub>2</sub>                                 | -2.62 | -5.21 | 2.59 | 2.12 |
| K <sub>4</sub> Cu <sub>4</sub> Te <sub>4</sub>                 | -1.95 | -4.54 | 2.59 | 1.48 |
| Sn <sub>2</sub> I <sub>2</sub> Br <sub>2</sub>                 | -3.66 | -6.25 | 2.59 | 2.41 |
| CuBiP <sub>2</sub> S <sub>6</sub>                              | -4.36 | -6.95 | 2.59 | 2.44 |
| ZnI <sub>2</sub>                                               | -3.84 | -6.44 | 2.60 | 2.49 |
| Co <sub>2</sub> H <sub>2</sub> O <sub>4</sub>                  | -3.53 | -6.13 | 2.60 | 2.88 |
| Al <sub>2</sub> Te <sub>2</sub>                                | -3.04 | -5.63 | 2.60 | 2.04 |
| ZrFeI <sub>6</sub>                                             | -3.60 | -6.20 | 2.60 | 2.22 |
| Ba <sub>4</sub> Bi <sub>4</sub> Cl <sub>4</sub> S <sub>8</sub> | -3.35 | -5.95 | 2.60 | 1.88 |
| In <sub>4</sub> Se <sub>4</sub> I <sub>4</sub>                 | -4.16 | -6.76 | 2.60 | 2.30 |
| Pd <sub>2</sub> F <sub>4</sub>                                 | -5.76 | -8.36 | 2.61 | 3.19 |
| Mo <sub>2</sub> F <sub>6</sub>                                 | -4.57 | -7.18 | 2.61 | 3.69 |

---

---

|                                                                |       |       |      |      |
|----------------------------------------------------------------|-------|-------|------|------|
| NaInP <sub>2</sub> Se <sub>6</sub>                             | -3.90 | -6.51 | 2.61 | 2.35 |
| Sn <sub>4</sub> O <sub>4</sub>                                 | -2.72 | -5.33 | 2.61 | 3.05 |
| MoCu <sub>2</sub> S <sub>4</sub>                               | -4.23 | -6.84 | 2.62 | 2.30 |
| Ag <sub>4</sub> S <sub>2</sub>                                 | -3.96 | -6.58 | 2.62 | 2.19 |
| Ga <sub>8</sub> Se <sub>12</sub>                               | -3.41 | -6.03 | 2.62 | 2.32 |
| In <sub>2</sub> Te <sub>2</sub> Cl <sub>2</sub>                | -4.55 | -7.17 | 2.62 | 2.43 |
| Sc <sub>2</sub> I <sub>6</sub>                                 | -3.46 | -6.09 | 2.63 | 2.25 |
| Zn <sub>2</sub> Se <sub>2</sub>                                | -3.77 | -6.40 | 2.63 | 2.57 |
| HfSe <sub>2</sub>                                              | -4.03 | -6.66 | 2.63 | 2.19 |
| P <sub>8</sub> S <sub>12</sub>                                 | -3.52 | -6.17 | 2.64 | 2.49 |
| In <sub>2</sub> Te <sub>2</sub> F <sub>2</sub>                 | -4.10 | -6.74 | 2.65 | 3.06 |
| In <sub>2</sub> S <sub>2</sub> Cl <sub>2</sub>                 | -4.69 | -7.34 | 2.65 | 2.61 |
| Ag <sub>2</sub> Br <sub>2</sub> Se <sub>3</sub> P <sub>4</sub> | -4.13 | -6.78 | 2.65 | 2.33 |
| Pt <sub>4</sub> P <sub>4</sub> S <sub>4</sub>                  | -3.88 | -6.53 | 2.65 | 2.10 |
| In <sub>2</sub> Si <sub>2</sub> S <sub>6</sub>                 | -4.27 | -6.93 | 2.66 | 2.46 |
| Pd <sub>2</sub> Se <sub>2</sub> O <sub>6</sub>                 | -3.94 | -6.60 | 2.66 | 2.87 |
| Hf <sub>2</sub> N <sub>2</sub> I <sub>2</sub>                  | -3.55 | -6.22 | 2.66 | 2.42 |
| In <sub>2</sub> S <sub>2</sub>                                 | -3.53 | -6.19 | 2.66 | 2.37 |
| GeI <sub>2</sub>                                               | -3.63 | -6.30 | 2.67 | 2.30 |
| CoSCl                                                          | -4.54 | -7.21 | 2.67 | 2.40 |
| Cu <sub>2</sub> Cl <sub>2</sub> Se <sub>3</sub> P <sub>4</sub> | -4.32 | -7.00 | 2.68 | 2.40 |
| Mo <sub>2</sub> O <sub>4</sub> Br <sub>4</sub>                 | -5.00 | -7.68 | 2.68 | 2.86 |
| Ag <sub>2</sub> Cl <sub>2</sub> Br <sub>4</sub>                | -4.88 | -7.57 | 2.68 | 2.52 |
| In <sub>2</sub> BrClS <sub>2</sub>                             | -4.61 | -7.29 | 2.69 | 2.57 |
| In <sub>4</sub> S <sub>6</sub>                                 | -3.94 | -6.63 | 2.69 | 2.44 |
| In <sub>8</sub> S <sub>12</sub>                                | -4.12 | -6.82 | 2.69 | 2.44 |
| Cu <sub>2</sub> I <sub>2</sub> S <sub>3</sub> P <sub>4</sub>   | -3.93 | -6.62 | 2.69 | 2.34 |
| P <sub>4</sub> S <sub>6</sub>                                  | -3.69 | -6.39 | 2.70 | 2.49 |
| Ge <sub>2</sub> BrClSe <sub>2</sub>                            | -4.00 | -6.69 | 2.70 | 2.51 |

---

---

|                 |       |       |      |      |
|-----------------|-------|-------|------|------|
| $P_4Se_6$       | -3.17 | -5.87 | 2.70 | 2.37 |
| $Sc_2Se_2I_2$   | -3.59 | -6.29 | 2.70 | 2.22 |
| $Sc_2Se_2Cl_2$  | -3.79 | -6.49 | 2.70 | 2.46 |
| $In_2Se_2Br_2$  | -4.97 | -7.68 | 2.70 | 2.46 |
| $Sn_6O_6$       | -2.61 | -5.32 | 2.71 | 3.05 |
| $Al_2S_2$       | -3.23 | -5.94 | 2.71 | 2.37 |
| $Na_2PdH_6S_6$  | -3.41 | -6.12 | 2.71 | 2.35 |
| $OsCl_2$        | -2.59 | -5.30 | 2.71 | 2.44 |
| $IrInI_3Br_3$   | -3.86 | -6.58 | 2.72 | 2.36 |
| $In_2H_2S_4$    | -3.81 | -6.53 | 2.72 | 2.46 |
| $Zn_2S_4$       | -2.97 | -5.69 | 2.72 | 2.61 |
| $Al_2Se_2$      | -3.59 | -6.31 | 2.72 | 2.24 |
| $In_2S_2Br_2$   | -4.51 | -7.23 | 2.73 | 2.52 |
| $Ga_2Al_2Se_6$  | -3.85 | -6.58 | 2.73 | 2.30 |
| $Zr_2S_4Br_4$   | -4.01 | -6.74 | 2.73 | 2.50 |
| $Pt_2Se_2O_6$   | -3.12 | -5.85 | 2.73 | 2.90 |
| $Pd_2I_4O_{12}$ | -4.36 | -7.09 | 2.73 | 3.04 |
| $P_2$           | -3.92 | -6.65 | 2.73 | 2.25 |
| $InGaS_2Br_2$   | -4.47 | -7.21 | 2.74 | 2.53 |
| $Ga_2Te_2Br_2$  | -4.09 | -6.83 | 2.74 | 2.36 |
| $Al_2SeSBr_2$   | -3.56 | -6.29 | 2.74 | 2.48 |
| $TiS_2$         | -4.41 | -7.15 | 2.74 | 2.33 |
| $Rh_2Br_6$      | -4.30 | -7.04 | 2.74 | 2.36 |
| $Ga_2S_5$       | -3.54 | -6.28 | 2.74 | 2.50 |
| $Ga_4Te_4Br_4$  | -3.97 | -6.72 | 2.75 | 2.36 |
| $K_4Se_4O_8$    | -2.32 | -5.07 | 2.75 | 2.37 |
| $Sn_4I_4F_4$    | -3.71 | -6.47 | 2.75 | 3.05 |
| $Zr_2N_2Br_2$   | -4.21 | -6.97 | 2.76 | 2.56 |
| $Ga_2S_2$       | -3.39 | -6.14 | 2.76 | 2.40 |

---

---

|                                                               |       |       |      |      |
|---------------------------------------------------------------|-------|-------|------|------|
| Zn <sub>2</sub> P <sub>4</sub> S <sub>8</sub>                 | -3.72 | -6.48 | 2.76 | 2.54 |
| In <sub>4</sub> Te <sub>4</sub> Br <sub>4</sub>               | -4.06 | -6.82 | 2.76 | 2.34 |
| GaAlSe <sub>2</sub>                                           | -3.50 | -6.27 | 2.77 | 2.23 |
| Sc <sub>2</sub> SeSI <sub>2</sub>                             | -3.68 | -6.45 | 2.77 | 2.26 |
| ScAgP <sub>2</sub> Se <sub>6</sub>                            | -3.55 | -6.32 | 2.78 | 2.29 |
| Pt <sub>2</sub> F <sub>4</sub>                                | -4.68 | -7.46 | 2.78 | 3.22 |
| Ag <sub>2</sub> I <sub>2</sub>                                | -3.38 | -6.16 | 2.78 | 2.18 |
| Pt <sub>2</sub> S <sub>4</sub>                                | -3.56 | -6.35 | 2.79 | 2.20 |
| SnSe                                                          | -3.38 | -6.17 | 2.79 | 2.23 |
| Ge <sub>4</sub> P <sub>4</sub> S <sub>4</sub>                 | -3.79 | -6.58 | 2.79 | 2.36 |
| In <sub>4</sub> S <sub>4</sub> I <sub>4</sub>                 | -4.07 | -6.86 | 2.79 | 2.38 |
| SiS <sub>2</sub>                                              | -3.51 | -6.30 | 2.79 | 2.49 |
| Zr <sub>2</sub> S <sub>4</sub> Cl <sub>4</sub>                | -3.99 | -6.79 | 2.79 | 2.60 |
| HfFeI <sub>6</sub>                                            | -3.37 | -6.17 | 2.80 | 2.22 |
| K <sub>2</sub> PdH <sub>6</sub> S <sub>6</sub>                | -3.30 | -6.09 | 2.80 | 1.22 |
| Cs <sub>2</sub> C <sub>6</sub> N <sub>6</sub> Se <sub>6</sub> | -3.39 | -6.20 | 2.81 | 2.28 |
| GeO                                                           | -4.27 | -7.08 | 2.81 | 3.10 |
| Ni <sub>2</sub> Se <sub>2</sub> O <sub>6</sub>                | -3.74 | -6.56 | 2.82 | 2.98 |
| Sc <sub>2</sub> Se <sub>2</sub> Br <sub>2</sub>               | -3.72 | -6.54 | 2.82 | 2.37 |
| Ga <sub>4</sub> Se <sub>4</sub> I <sub>4</sub>                | -3.69 | -6.52 | 2.82 | 2.32 |
| Bi <sub>2</sub> Br <sub>6</sub>                               | -5.00 | -7.82 | 2.82 | 2.59 |
| RuCl <sub>2</sub>                                             | -3.12 | -5.94 | 2.82 | 2.41 |
| Ga <sub>2</sub> Te <sub>2</sub> F <sub>2</sub>                | -3.98 | -6.81 | 2.83 | 3.07 |
| CuInP <sub>2</sub> S <sub>6</sub>                             | -4.19 | -7.02 | 2.83 | 2.44 |
| Si <sub>4</sub> P <sub>4</sub> Se <sub>4</sub>                | -3.28 | -6.11 | 2.83 | 2.28 |
| Ga <sub>4</sub> Se <sub>4</sub> Br <sub>4</sub>               | -4.56 | -7.39 | 2.83 | 2.47 |
| Al <sub>2</sub> Se <sub>2</sub> I <sub>2</sub>                | -3.45 | -6.28 | 2.83 | 2.29 |
| In <sub>2</sub> Ga <sub>2</sub> S <sub>6</sub>                | -4.60 | -7.43 | 2.83 | 2.45 |
| Zr <sub>2</sub> N <sub>2</sub> Br <sub>2</sub>                | -4.98 | -7.82 | 2.83 | 2.56 |

---

---

|                                                               |       |       |      |      |
|---------------------------------------------------------------|-------|-------|------|------|
| In <sub>2</sub> S <sub>2</sub> Br <sub>2</sub>                | -5.00 | -7.83 | 2.83 | 2.52 |
| Y <sub>2</sub> O <sub>2</sub> I <sub>2</sub>                  | -3.10 | -5.93 | 2.83 | 1.68 |
| In <sub>4</sub> Te <sub>4</sub> Cl <sub>4</sub>               | -4.40 | -7.24 | 2.84 | 2.44 |
| Ag <sub>5</sub> I <sub>5</sub>                                | -3.33 | -6.17 | 2.84 | 2.18 |
| Pd <sub>2</sub> S <sub>2</sub> O <sub>6</sub>                 | -4.47 | -7.32 | 2.85 | 2.90 |
| Si <sub>2</sub> H <sub>2</sub>                                | -2.71 | -5.57 | 2.86 | 1.84 |
| W <sub>2</sub> O <sub>6</sub>                                 | -6.91 | -9.78 | 2.87 | 3.18 |
| Al <sub>2</sub> Se <sub>2</sub>                               | -3.42 | -6.28 | 2.87 | 2.24 |
| Ga <sub>4</sub> Te <sub>4</sub> Cl <sub>4</sub>               | -4.16 | -7.03 | 2.87 | 2.45 |
| PdO <sub>2</sub>                                              | -5.93 | -8.80 | 2.88 | 2.75 |
| Pd <sub>3</sub> P <sub>2</sub> S <sub>8</sub>                 | -4.53 | -7.41 | 2.88 | 2.23 |
| Hf <sub>2</sub> S <sub>4</sub> Br <sub>4</sub>                | -3.82 | -6.70 | 2.88 | 2.51 |
| Al <sub>2</sub> S <sub>2</sub>                                | -3.87 | -6.75 | 2.88 | 2.37 |
| In <sub>4</sub> Cl <sub>8</sub>                               | -4.58 | -7.47 | 2.88 | 2.74 |
| Zn <sub>2</sub> I <sub>2</sub>                                | -3.11 | -5.99 | 2.88 | 2.55 |
| Hf <sub>2</sub> SeSI <sub>4</sub>                             | -3.67 | -6.56 | 2.88 | 2.26 |
| Ni <sub>3</sub> P <sub>2</sub> S <sub>8</sub>                 | -4.69 | -7.58 | 2.89 | 2.36 |
| Ga <sub>4</sub> Te <sub>4</sub> Cl <sub>4</sub>               | -3.99 | -6.88 | 2.89 | 2.45 |
| Ga <sub>2</sub> Te <sub>2</sub> Cl <sub>2</sub>               | -4.16 | -7.05 | 2.89 | 2.45 |
| Ir <sub>2</sub> Br <sub>6</sub>                               | -3.55 | -6.44 | 2.89 | 2.39 |
| P <sub>4</sub> Se <sub>6</sub>                                | -3.29 | -6.18 | 2.90 | 2.37 |
| In <sub>3</sub> SeSBr <sub>5</sub>                            | -4.76 | -7.66 | 2.90 | 2.54 |
| In <sub>2</sub> Te <sub>2</sub> H <sub>2</sub> S <sub>8</sub> | -3.66 | -6.56 | 2.90 | 2.46 |
| Ag <sub>4</sub> S <sub>2</sub>                                | -3.63 | -6.54 | 2.91 | 2.19 |
| Ag <sub>2</sub> Ge <sub>2</sub> I <sub>6</sub>                | -3.47 | -6.38 | 2.91 | 2.24 |
| Al <sub>2</sub> Ge <sub>2</sub> S <sub>6</sub>                | -3.73 | -6.64 | 2.91 | 2.44 |
| Na <sub>2</sub> Nb <sub>2</sub> Br <sub>12</sub>              | -4.63 | -7.55 | 2.91 | 2.12 |
| GeSe                                                          | -3.31 | -6.22 | 2.92 | 2.28 |
| In <sub>4</sub> Te <sub>4</sub> Cl <sub>4</sub>               | -4.01 | -6.92 | 2.92 | 2.44 |

---

---

|                                                                |       |       |      |      |
|----------------------------------------------------------------|-------|-------|------|------|
| Sc <sub>2</sub> SeSCl <sub>2</sub>                             | -3.92 | -6.84 | 2.92 | 2.50 |
| LiAlP <sub>2</sub> Se <sub>6</sub>                             | -3.56 | -6.48 | 2.92 | 2.34 |
| Li <sub>2</sub> S <sub>2</sub> F <sub>2</sub>                  | -3.06 | -5.99 | 2.92 | 3.40 |
| Au <sub>2</sub> Br <sub>2</sub>                                | -2.97 | -5.90 | 2.93 | 2.25 |
| Cs <sub>4</sub> Cu <sub>4</sub> Se <sub>4</sub>                | -1.14 | -4.07 | 2.93 | 1.55 |
| Al <sub>2</sub> H <sub>2</sub> S <sub>4</sub>                  | -3.13 | -6.06 | 2.93 | 2.45 |
| Sr <sub>4</sub> P <sub>4</sub> F <sub>4</sub> S <sub>8</sub>   | -3.63 | -6.56 | 2.94 | 2.34 |
| LiNbBr <sub>6</sub>                                            | -4.84 | -7.78 | 2.94 | 1.90 |
| Al <sub>2</sub> Te <sub>2</sub> I <sub>2</sub>                 | -3.42 | -6.36 | 2.94 | 2.18 |
| Sc <sub>4</sub> S <sub>6</sub>                                 | -2.96 | -5.90 | 2.94 | 2.33 |
| Al <sub>2</sub> S <sub>2</sub>                                 | -3.77 | -6.71 | 2.95 | 2.37 |
| Hf <sub>2</sub> S <sub>4</sub> Cl <sub>4</sub>                 | -3.80 | -6.75 | 2.95 | 2.60 |
| Ge <sub>2</sub> N <sub>2</sub> Cl <sub>2</sub>                 | -4.44 | -7.39 | 2.95 | 2.82 |
| Al <sub>2</sub> I <sub>6</sub>                                 | -3.49 | -6.44 | 2.96 | 2.30 |
| K <sub>2</sub> Cu <sub>2</sub> Se <sub>2</sub>                 | -1.50 | -4.45 | 2.96 | 1.54 |
| Ba <sub>4</sub> P <sub>4</sub> F <sub>4</sub> S <sub>8</sub>   | -3.64 | -6.60 | 2.96 | 2.25 |
| Ag <sub>2</sub> Br <sub>2</sub>                                | -4.27 | -7.23 | 2.96 | 2.31 |
| Mg <sub>2</sub> P <sub>2</sub> Se <sub>6</sub>                 | -3.56 | -6.53 | 2.96 | 2.34 |
| MgK <sub>2</sub> Se <sub>2</sub> H <sub>4</sub> S <sub>8</sub> | -2.95 | -5.91 | 2.97 | 1.48 |
| Sr <sub>2</sub> I <sub>4</sub> O <sub>8</sub>                  | -2.00 | -4.96 | 2.97 | 2.10 |
| Ga <sub>4</sub> S <sub>4</sub> I <sub>4</sub>                  | -3.52 | -6.49 | 2.97 | 2.39 |
| Ag <sub>8</sub> S <sub>4</sub>                                 | -3.66 | -6.63 | 2.97 | 2.19 |
| Pt <sub>2</sub> S <sub>2</sub> O <sub>6</sub>                  | -3.43 | -6.41 | 2.98 | 2.93 |
| SnS                                                            | -3.58 | -6.56 | 2.98 | 2.34 |
| Cu <sub>2</sub> Br <sub>2</sub> S <sub>3</sub> P <sub>4</sub>  | -4.01 | -7.00 | 2.99 | 2.41 |
| Ag <sub>2</sub> Cl <sub>2</sub> Se <sub>3</sub> P <sub>4</sub> | -4.10 | -7.09 | 2.99 | 2.37 |
| Al <sub>2</sub> Si <sub>2</sub> Se <sub>6</sub>                | -3.50 | -6.49 | 2.99 | 2.30 |
| Li <sub>6</sub> Te <sub>2</sub> H <sub>2</sub> S <sub>8</sub>  | -2.91 | -5.90 | 2.99 | 2.45 |
| Fe <sub>2</sub> Cu <sub>2</sub> I <sub>6</sub>                 | -2.90 | -5.90 | 2.99 | 2.20 |

---

---

|                                   |       |       |      |      |
|-----------------------------------|-------|-------|------|------|
| LiGaP <sub>2</sub> S <sub>6</sub> | -4.13 | -7.13 | 3.00 | 2.49 |
|-----------------------------------|-------|-------|------|------|

---

**Table S3.** Distribution statistics of the screening results based on  $\Delta V$  (eV) and  $\Delta\chi_m$ .

| Predict Type (Z-<br>scheme) | $\Delta V > 0$ | $\Delta V > 0.3$ | $\Delta V > 0.6$ | $\Delta V > 0.9$ | $\Delta V > 1.2$ | $\Delta V > 1.5$ | $\Delta V > 1.8$ | $\Delta V > 2.1$ |
|-----------------------------|----------------|------------------|------------------|------------------|------------------|------------------|------------------|------------------|
| $\Delta\chi_m > 0$          | 24471          | 18834            | 13562            | 9069             | 5444             | 3150             | 1643             | 754              |
| $\Delta\chi_m > 0.1$        | 18652          | 14398            | 10400            | 6984             | 4194             | 2484             | 1325             | 612              |
| $\Delta\chi_m > 0.2$        | 13781          | 10732            | 7842             | 5317             | 3215             | 1938             | 1050             | 482              |
| $\Delta\chi_m > 0.3$        | 10093          | 7974             | 5887             | 4068             | 2504             | 1511             | 840              | 389              |
| $\Delta\chi_m > 0.4$        | 7412           | 5935             | 4450             | 3138             | 1994             | 1226             | 685              | 321              |
| $\Delta\chi_m > 0.5$        | 5489           | 4426             | 3351             | 2409             | 1558             | 974              | 547              | 262              |
| $\Delta\chi_m > 0.6$        | 4239           | 3423             | 2607             | 1862             | 1208             | 762              | 429              | 208              |
| $\Delta\chi_m > 0.7$        | 3084           | 2501             | 1901             | 1360             | 881              | 562              | 308              | 140              |
| $\Delta\chi_m > 0.8$        | 2194           | 1778             | 1359             | 982              | 637              | 402              | 220              | 103              |
| $\Delta\chi_m > 0.9$        | 1484           | 1212             | 923              | 656              | 416              | 258              | 128              | 58               |
| $\Delta\chi_m > 1.0$        | 954            | 791              | 609              | 437              | 262              | 161              | 78               | 27               |
| $\Delta\chi_m > 1.1$        | 643            | 542              | 421              | 311              | 191              | 117              | 59               | 21               |
| $\Delta\chi_m > 1.2$        | 411            | 335              | 247              | 180              | 105              | 69               | 38               | 11               |
| $\Delta\chi_m > 1.3$        | 264            | 208              | 154              | 110              | 65               | 46               | 23               | 5                |
| $\Delta\chi_m > 1.4$        | 151            | 114              | 82               | 60               | 41               | 28               | 15               | 5                |
| $\Delta\chi_m > 1.5$        | 87             | 62               | 48               | 37               | 27               | 19               | 10               | 3                |

**Table S4.** 46 potential Z-scheme heterostructure photocatalysts identified through high-throughput screening.

| Heterostructure                                                                                 | CBM_A<br>(eV) | VBM_A<br>(eV) | CBM_B<br>(eV) | VBM_B<br>(eV) | $\Delta V$ (eV) | $\Delta\chi_m$ |
|-------------------------------------------------------------------------------------------------|---------------|---------------|---------------|---------------|-----------------|----------------|
| Ta <sub>3</sub> SF <sub>7</sub> /K <sub>2</sub> Au <sub>2</sub> Se <sub>2</sub>                 | -3.65         | -5.45         | -1.39         | -3.93         | 1.99            | 2.13           |
| Ta <sub>3</sub> SF <sub>7</sub> /Cs <sub>4</sub> Cu <sub>4</sub> Se <sub>4</sub>                | -3.65         | -5.45         | -1.14         | -4.07         | 2.09            | 2.03           |
| Ta <sub>3</sub> SeF <sub>7</sub> /K <sub>2</sub> Au <sub>2</sub> Se <sub>2</sub>                | -3.57         | -5.30         | -1.39         | -3.93         | 1.82            | 2.11           |
| Ta <sub>3</sub> SeF <sub>7</sub> /Cs <sub>4</sub> Cu <sub>4</sub> Se <sub>4</sub>               | -3.57         | -5.30         | -1.14         | -4.07         | 1.92            | 2.01           |
| Ta <sub>3</sub> TeF <sub>7</sub> /K <sub>2</sub> Au <sub>2</sub> Se <sub>2</sub>                | -3.46         | -5.16         | -1.39         | -3.93         | 1.60            | 2.09           |
| Ta <sub>3</sub> TeF <sub>7</sub> /Cs <sub>4</sub> Cu <sub>4</sub> Se <sub>4</sub>               | -3.46         | -5.16         | -1.14         | -4.07         | 1.70            | 1.98           |
| CrMo <sub>3</sub> O <sub>8</sub> /Nb <sub>2</sub> O <sub>2</sub> Br <sub>4</sub>                | -5.85         | -7.20         | -4.03         | -5.95         | 1.73            | 1.38           |
| MoCr <sub>3</sub> S <sub>8</sub> /Cs <sub>2</sub> Na <sub>2</sub> Te <sub>2</sub>               | -2.74         | -3.77         | -0.89         | -2.94         | 1.65            | 1.31           |
| BiSF/Si <sub>2</sub> H <sub>2</sub>                                                             | -5.08         | -7.33         | -2.71         | -5.57         | 1.87            | 1.31           |
| BiSeF/SrHOI                                                                                     | -4.83         | -6.81         | -2.85         | -4.86         | 1.94            | 1.32           |
| BiTeF/K <sub>2</sub> Cu <sub>2</sub> Se <sub>2</sub>                                            | -4.38         | -5.56         | -1.50         | -4.45         | 2.81            | 1.45           |
| TiSeS/In <sub>3</sub> F <sub>3</sub>                                                            | -4.97         | -6.31         | -3.02         | -5.23         | 1.68            | 1.34           |
| Rh <sub>4</sub> S <sub>6</sub> /Li <sub>2</sub> S <sub>2</sub> F <sub>2</sub>                   | -5.36         | -6.52         | -3.06         | -5.99         | 1.68            | 1.32           |
| Sc <sub>4</sub> S <sub>6</sub> /K <sub>4</sub> O <sub>2</sub>                                   | -2.96         | -5.90         | -1.22         | -3.14         | 1.57            | 1.33           |
| Cr <sub>4</sub> O <sub>10</sub> /Nb <sub>2</sub> S <sub>4</sub> Br <sub>4</sub>                 | -5.60         | -6.92         | -3.48         | -5.94         | 1.79            | 1.54           |
| Cr <sub>4</sub> O <sub>10</sub> /Nb <sub>2</sub> S <sub>4</sub> I <sub>4</sub>                  | -5.60         | -6.92         | -3.49         | -5.78         | 1.93            | 1.35           |
| Cr <sub>4</sub> O <sub>10</sub> /MgK <sub>2</sub> Se <sub>2</sub> H <sub>4</sub> S <sub>8</sub> | -5.60         | -6.92         | -2.95         | -5.91         | 2.35            | 1.63           |
| Cr <sub>4</sub> O <sub>10</sub> /Ba <sub>2</sub> Bi <sub>4</sub> S <sub>8</sub>                 | -5.60         | -6.92         | -3.31         | -5.62         | 2.27            | 1.63           |
| Cr <sub>4</sub> O <sub>10</sub> /K <sub>2</sub> PdH <sub>6</sub> S <sub>6</sub>                 | -5.60         | -6.92         | -3.30         | -6.09         | 1.81            | 1.90           |
| In <sub>2</sub> S <sub>2</sub> F <sub>2</sub> /Si <sub>2</sub> H <sub>2</sub>                   | -5.16         | -7.04         | -2.71         | -5.57         | 2.04            | 1.39           |
| Au <sub>4</sub> O <sub>4</sub> F <sub>4</sub> /Y <sub>2</sub> Se <sub>4</sub> Br <sub>4</sub>   | -6.65         | -9.05         | -4.61         | -6.65         | 2.03            | 1.33           |
| In <sub>4</sub> O <sub>4</sub> Br <sub>4</sub> /Nb <sub>2</sub> S <sub>4</sub> Br <sub>4</sub>  | -5.68         | -7.79         | -3.48         | -5.94         | 1.94            | 1.36           |
| Y <sub>4</sub> Te <sub>4</sub> Br <sub>4</sub> /Sn <sub>4</sub> O <sub>4</sub>                  | -4.91         | -6.06         | -2.72         | -5.33         | 1.78            | 1.60           |
| Si <sub>2</sub> F <sub>2</sub> /Ga <sub>2</sub> Te <sub>2</sub>                                 | -5.50         | -6.99         | -3.67         | -5.53         | 1.80            | 1.44           |
| Si <sub>2</sub> F <sub>2</sub> /Ga <sub>2</sub> Te <sub>2</sub>                                 | -5.50         | -6.99         | -3.69         | -5.53         | 1.79            | 1.44           |
| Si <sub>2</sub> F <sub>2</sub> /Si <sub>2</sub> H <sub>2</sub>                                  | -5.50         | -6.99         | -2.71         | -5.57         | 2.72            | 1.66           |

|                                     |       |       |       |       |      |      |
|-------------------------------------|-------|-------|-------|-------|------|------|
| $Y_4Te_4Cl_4/Sn_4O_4$               | -4.93 | -6.11 | -2.72 | -5.33 | 1.82 | 1.45 |
| $Ga_2O_2/Sc_2CH_2$                  | -5.32 | -7.80 | -3.40 | -5.41 | 1.84 | 1.39 |
| $Ga_2O_2/Sc_2CH_2$                  | -5.38 | -7.80 | -3.40 | -5.41 | 1.95 | 1.39 |
| $Sn_2S_2/K_4O_2$                    | -2.99 | -5.51 | -1.22 | -3.14 | 1.62 | 1.35 |
| $Ag_2F_2S_4/Rb_2C_2Se_2H_6S_6$      | -4.98 | -6.97 | -3.25 | -5.06 | 1.66 | 1.51 |
| $Sn_4O_4/Rb_4O_2$                   | -2.72 | -5.33 | -1.15 | -2.75 | 1.53 | 1.92 |
| $Sn_4O_4/Cs_4S_2$                   | -2.72 | -5.33 | -0.85 | -2.93 | 1.65 | 2.21 |
| $Sn_4S_4/K_4O_2$                    | -2.90 | -5.33 | -1.13 | -2.96 | 1.72 | 1.35 |
| $Pt_2F_4/SrHOI$                     | -4.68 | -7.46 | -2.85 | -4.86 | 1.65 | 1.46 |
| $Ag_4F_8/LiNbBr_6$                  | -7.15 | -8.79 | -4.84 | -7.78 | 1.69 | 1.41 |
| $Au_4F_8/K_2Ta_2I_{12}$             | -6.35 | -7.63 | -4.41 | -6.46 | 1.83 | 1.51 |
| $Li_2V_2Au_4O_{12}/MgK_2Se_2H_4S_8$ | -5.18 | -7.48 | -2.95 | -5.91 | 1.50 | 1.41 |
| $Mo_2O_4Br_4/Rb_2C_2Se_2H_6S_6$     | -5.00 | -7.68 | -3.25 | -5.06 | 1.69 | 1.57 |
| $W_2O_4Br_4/MgK_2Se_2H_4S_8$        | -5.24 | -7.59 | -2.95 | -5.91 | 1.63 | 1.38 |
| $AuInF_4/Sr_2I_4O_8$                | -4.87 | -6.98 | -2.00 | -4.96 | 2.79 | 1.41 |
| $Au_4S_4Br_4F_4/K_2PdH_6S_6$        | -5.55 | -6.99 | -3.30 | -6.09 | 1.72 | 1.55 |
| $Au_4S_4Cl_4F_4/K_2PdH_6S_6$        | -5.73 | -7.27 | -3.30 | -6.09 | 2.07 | 1.60 |
| $Bi_2Br_6/Rb_2C_2Se_2H_6S_6$        | -5.00 | -7.82 | -3.25 | -5.06 | 1.69 | 1.31 |
| $Mo_2F_6/Ir_2S_2Cl_2$               | -5.96 | -6.97 | -4.02 | -6.22 | 1.68 | 1.37 |
| $Mo_2F_6/Ir_2Se_2Cl_2$              | -5.96 | -6.97 | -3.82 | -6.06 | 2.04 | 1.42 |

**Table S5.** 279 screened potential solar cell candidates.

| Heterostructures                                                                                 | CBM_A (eV) | VBM_A (eV) | CBM_B (eV) | VBM_B (eV) | PCE (%) |
|--------------------------------------------------------------------------------------------------|------------|------------|------------|------------|---------|
| Zr <sub>2</sub> Se <sub>6</sub> /HfSeS                                                           | -4.61      | -5.64      | -4.62      | -6.13      | 20.55   |
| Zr <sub>2</sub> Se <sub>6</sub> /Ir <sub>2</sub> S <sub>2</sub> Br <sub>2</sub>                  | -4.61      | -5.64      | -4.66      | -5.84      | 20.01   |
| P <sub>4</sub> /Bi <sub>2</sub> O <sub>2</sub>                                                   | -3.89      | -5.40      | -3.87      | -4.91      | 20.29   |
| Re <sub>6</sub> Te <sub>8</sub> F <sub>2</sub> /Fe <sub>2</sub> Te <sub>6</sub> P <sub>2</sub>   | -4.42      | -5.42      | -4.45      | -5.62      | 20.36   |
| Re <sub>6</sub> Te <sub>8</sub> F <sub>2</sub> /In <sub>2</sub> P <sub>2</sub> S <sub>6</sub>    | -4.42      | -5.42      | -4.46      | -5.86      | 20.30   |
| CaSn <sub>3</sub> S <sub>4</sub> Br <sub>4</sub> /Rh <sub>4</sub> Se <sub>8</sub>                | -5.01      | -6.31      | -4.94      | -5.99      | 20.01   |
| CaSn <sub>3</sub> S <sub>4</sub> Br <sub>4</sub> /Ir <sub>2</sub> Ni <sub>2</sub> S <sub>8</sub> | -5.01      | -6.31      | -5.01      | -6.37      | 21.19   |
| Pt <sub>4</sub> SeS <sub>3</sub> I <sub>4</sub> /In <sub>2</sub> Te <sub>2</sub> I <sub>2</sub>  | -4.34      | -5.79      | -4.34      | -5.76      | 20.90   |
| Pt <sub>4</sub> SeS <sub>3</sub> I <sub>4</sub> /Au <sub>2</sub> Te <sub>4</sub> Cl <sub>2</sub> | -4.34      | -5.79      | -4.34      | -5.93      | 20.06   |
| Pt <sub>4</sub> SeS <sub>3</sub> I <sub>4</sub> /Hf <sub>2</sub> P <sub>2</sub> Se <sub>6</sub>  | -4.34      | -5.79      | -4.30      | -5.39      | 20.19   |
| Pt <sub>4</sub> SeS <sub>3</sub> I <sub>4</sub> /Zr <sub>2</sub> P <sub>2</sub> Se <sub>6</sub>  | -4.34      | -5.79      | -4.29      | -5.36      | 20.06   |
| Nb <sub>3</sub> OBr <sub>7</sub> /In <sub>2</sub> Te <sub>2</sub> I <sub>2</sub>                 | -4.34      | -5.78      | -4.34      | -5.76      | 20.88   |
| Nb <sub>3</sub> OBr <sub>7</sub> /Au <sub>2</sub> Te <sub>4</sub> Cl <sub>2</sub>                | -4.34      | -5.78      | -4.34      | -5.93      | 20.10   |
| Nb <sub>3</sub> OBr <sub>7</sub> /Hf <sub>2</sub> P <sub>2</sub> Se <sub>6</sub>                 | -4.34      | -5.78      | -4.30      | -5.39      | 20.17   |
| Nb <sub>3</sub> OBr <sub>7</sub> /Zr <sub>2</sub> P <sub>2</sub> Se <sub>6</sub>                 | -4.34      | -5.78      | -4.29      | -5.36      | 20.04   |
| Ta <sub>3</sub> OCl <sub>7</sub> /Sc <sub>4</sub> Te <sub>6</sub>                                | -4.08      | -5.65      | -4.06      | -5.28      | 20.04   |
| Nb <sub>3</sub> SI <sub>7</sub> /Sc <sub>4</sub> Te <sub>6</sub>                                 | -4.10      | -5.33      | -4.06      | -5.28      | 20.49   |
| Nb <sub>3</sub> SI <sub>7</sub> /Pd <sub>2</sub> Se <sub>4</sub>                                 | -4.10      | -5.33      | -4.11      | -5.35      | 21.01   |
| Ta <sub>3</sub> SBr <sub>7</sub> /Ga <sub>2</sub> Te <sub>5</sub>                                | -3.89      | -5.40      | -3.89      | -5.28      | 20.61   |
| Ta <sub>3</sub> SBr <sub>7</sub> /Ge <sub>2</sub> Te <sub>6</sub> P <sub>2</sub>                 | -3.89      | -5.40      | -3.89      | -5.14      | 20.57   |
| Ta <sub>3</sub> SBr <sub>7</sub> /W <sub>2</sub> Cr <sub>2</sub> Se <sub>8</sub>                 | -3.89      | -5.40      | -3.87      | -5.07      | 20.25   |
| Ta <sub>3</sub> SI <sub>7</sub> /Ta <sub>3</sub> SeI <sub>7</sub>                                | -3.90      | -5.19      | -3.85      | -5.11      | 20.35   |
| Ta <sub>3</sub> SI <sub>7</sub> /Ge <sub>2</sub> Te <sub>6</sub> P <sub>2</sub>                  | -3.90      | -5.19      | -3.89      | -5.14      | 21.15   |
| Ta <sub>3</sub> SI <sub>7</sub> /W <sub>2</sub> Cr <sub>2</sub> Se <sub>8</sub>                  | -3.90      | -5.19      | -3.87      | -5.07      | 20.74   |
| Nb <sub>3</sub> SeBr <sub>7</sub> /Nb <sub>3</sub> SeI <sub>7</sub>                              | -4.08      | -5.55      | -4.04      | -5.27      | 20.11   |
| Nb <sub>3</sub> SeI <sub>7</sub> /Sc <sub>4</sub> Te <sub>6</sub>                                | -4.04      | -5.27      | -4.06      | -5.28      | 20.76   |
| Ta <sub>3</sub> SeBr <sub>7</sub> /CrMo <sub>3</sub> Se <sub>8</sub>                             | -3.84      | -5.29      | -3.81      | -5.24      | 20.46   |

|                                                                                    |       |       |       |       |       |
|------------------------------------------------------------------------------------|-------|-------|-------|-------|-------|
| Ta <sub>3</sub> SeBr <sub>7</sub> /Nb <sub>2</sub> Te <sub>4</sub> Br <sub>4</sub> | -3.84 | -5.29 | -3.83 | -5.05 | 20.81 |
| Ta <sub>3</sub> SeBr <sub>7</sub> /MoAg <sub>2</sub> Te <sub>4</sub>               | -3.84 | -5.29 | -3.80 | -4.91 | 20.21 |
| Ta <sub>3</sub> SeCl <sub>7</sub> /Ta <sub>2</sub> Te <sub>4</sub> Br <sub>4</sub> | -3.86 | -5.44 | -3.85 | -4.93 | 20.04 |
| Ta <sub>3</sub> SeI <sub>7</sub> /Ga <sub>2</sub> Te <sub>5</sub>                  | -3.85 | -5.11 | -3.89 | -5.28 | 20.39 |
| Ta <sub>3</sub> SeI <sub>7</sub> /Ge <sub>2</sub> Te <sub>6</sub> P <sub>2</sub>   | -3.85 | -5.11 | -3.89 | -5.14 | 20.54 |
| Ta <sub>3</sub> SeI <sub>7</sub> /MoAg <sub>2</sub> Te <sub>4</sub>                | -3.85 | -5.11 | -3.80 | -4.91 | 20.13 |
| Nb <sub>3</sub> TeBr <sub>7</sub> /Nb <sub>3</sub> TeI <sub>7</sub>                | -3.96 | -5.40 | -3.94 | -5.19 | 20.63 |
| Nb <sub>3</sub> TeCl <sub>7</sub> /AgAlTe <sub>6</sub> P <sub>2</sub>              | -4.00 | -5.55 | -4.00 | -5.06 | 20.33 |
| Nb <sub>3</sub> TeCl <sub>7</sub> /Nb <sub>2</sub> Te <sub>4</sub> Cl <sub>4</sub> | -4.00 | -5.55 | -3.99 | -5.01 | 20.28 |
| Nb <sub>3</sub> TeI <sub>7</sub> /Ge <sub>6</sub> P <sub>8</sub>                   | -3.94 | -5.19 | -3.95 | -5.51 | 20.24 |
| Ta <sub>3</sub> TeBr <sub>7</sub> /Ta <sub>3</sub> TeCl <sub>7</sub>               | -3.75 | -5.15 | -3.76 | -5.27 | 20.45 |
| Ta <sub>3</sub> TeBr <sub>7</sub> /Si <sub>2</sub> Te <sub>4</sub>                 | -3.75 | -5.15 | -3.72 | -4.81 | 20.53 |
| Ta <sub>3</sub> TeBr <sub>7</sub> /Hf <sub>2</sub> Ge <sub>2</sub> Te <sub>8</sub> | -3.75 | -5.15 | -3.73 | -4.79 | 20.61 |
| Ta <sub>3</sub> TeBr <sub>7</sub> /Zr <sub>2</sub> Sn <sub>2</sub> Te <sub>8</sub> | -3.75 | -5.15 | -3.70 | -4.73 | 20.13 |
| Ta <sub>3</sub> TeBr <sub>7</sub> /MoAu <sub>2</sub> Se <sub>4</sub>               | -3.75 | -5.15 | -3.72 | -4.97 | 20.55 |
| Ta <sub>3</sub> TeCl <sub>7</sub> /Nb <sub>2</sub> Te <sub>4</sub> I <sub>4</sub>  | -3.76 | -5.27 | -3.76 | -5.04 | 20.56 |
| Ta <sub>3</sub> TeCl <sub>7</sub> /Ta <sub>2</sub> Te <sub>4</sub> I <sub>4</sub>  | -3.76 | -5.27 | -3.75 | -4.93 | 20.47 |
| Ta <sub>3</sub> TeI <sub>7</sub> /CrMo <sub>3</sub> Se <sub>8</sub>                | -3.78 | -5.01 | -3.81 | -5.24 | 20.50 |
| Ta <sub>3</sub> TeI <sub>7</sub> /Ta <sub>2</sub> Te <sub>4</sub> I <sub>4</sub>   | -3.78 | -5.01 | -3.75 | -4.93 | 20.65 |
| CrMo <sub>3</sub> O <sub>8</sub> /Bi <sub>2</sub> S <sub>3</sub>                   | -5.85 | -7.20 | -5.83 | -6.87 | 20.73 |
| CrMo <sub>3</sub> Se <sub>8</sub> /Nb <sub>2</sub> Te <sub>4</sub> I <sub>4</sub>  | -3.81 | -5.24 | -3.76 | -5.04 | 20.05 |
| CrMo <sub>3</sub> Se <sub>8</sub> /Sc <sub>2</sub> P <sub>2</sub> Se <sub>6</sub>  | -3.81 | -5.24 | -3.77 | -4.99 | 20.35 |
| CrMo <sub>3</sub> Se <sub>8</sub> /MoAg <sub>2</sub> Te <sub>4</sub>               | -3.81 | -5.24 | -3.80 | -4.91 | 20.74 |
| CrMo <sub>3</sub> Te <sub>8</sub> /CrW <sub>3</sub> Se <sub>8</sub>                | -3.64 | -4.74 | -3.69 | -5.02 | 20.15 |
| CrMo <sub>3</sub> Te <sub>8</sub> /Hf <sub>2</sub> Si <sub>2</sub> Te <sub>8</sub> | -3.64 | -4.74 | -3.65 | -4.81 | 20.72 |
| CrMo <sub>3</sub> Te <sub>8</sub> /W <sub>2</sub> Cl <sub>6</sub>                  | -3.64 | -4.74 | -3.65 | -4.82 | 20.74 |
| CrW <sub>3</sub> Se <sub>8</sub> /Hf <sub>2</sub> Si <sub>2</sub> Te <sub>8</sub>  | -3.69 | -5.02 | -3.65 | -4.81 | 20.50 |
| CrW <sub>3</sub> Se <sub>8</sub> /W <sub>2</sub> Cl <sub>6</sub>                   | -3.69 | -5.02 | -3.65 | -4.82 | 20.52 |
| MoW <sub>3</sub> Te <sub>8</sub> /WMo <sub>3</sub> Te <sub>8</sub>                 | -3.36 | -4.58 | -3.41 | -4.73 | 20.32 |

|                                                                                  |       |       |       |       |       |
|----------------------------------------------------------------------------------|-------|-------|-------|-------|-------|
| MoW <sub>3</sub> Te <sub>8</sub> /Zr <sub>2</sub> Br <sub>4</sub>                | -3.36 | -4.58 | -3.35 | -4.49 | 21.05 |
| MoW <sub>3</sub> Te <sub>8</sub> /W <sub>2</sub> Mo <sub>2</sub> Te <sub>8</sub> | -3.36 | -4.58 | -3.38 | -4.66 | 20.83 |
| WMo <sub>3</sub> Te <sub>8</sub> /Zr <sub>2</sub> Br <sub>4</sub>                | -3.41 | -4.73 | -3.35 | -4.49 | 20.07 |
| WMo <sub>3</sub> Te <sub>8</sub> /Re <sub>4</sub> Te <sub>8</sub>                | -3.41 | -4.73 | -3.46 | -4.79 | 20.14 |
| WMo <sub>3</sub> Te <sub>8</sub> /W <sub>2</sub> Mo <sub>2</sub> Te <sub>8</sub> | -3.41 | -4.73 | -3.38 | -4.66 | 20.82 |
| BiSBr/Co <sub>2</sub> O <sub>2</sub> Cl <sub>2</sub>                             | -5.49 | -7.09 | -5.49 | -6.52 | 20.01 |
| BiSeBr/Au <sub>2</sub> Se <sub>2</sub> Br <sub>2</sub>                           | -5.42 | -6.78 | -5.41 | -6.68 | 21.05 |
| BiSeBr/Rh <sub>4</sub> S <sub>6</sub>                                            | -5.42 | -6.78 | -5.36 | -6.52 | 20.05 |
| BiTeBr/BiTeCl                                                                    | -5.16 | -6.32 | -5.19 | -6.39 | 20.46 |
| BiTeBr/BiTeCl                                                                    | -5.16 | -6.32 | -5.14 | -6.29 | 20.56 |
| BiTeBr/BiSI                                                                      | -5.16 | -6.32 | -5.19 | -6.36 | 20.59 |
| BiTeBr/BiSeI                                                                     | -5.16 | -6.32 | -5.21 | -6.42 | 20.19 |
| BiTeBr/Ir <sub>2</sub> S <sub>2</sub> Cl <sub>2</sub>                            | -5.05 | -6.21 | -5.09 | -6.29 | 20.44 |
| BiSeCl/Co <sub>2</sub> O <sub>2</sub> Cl <sub>2</sub>                            | -5.50 | -7.01 | -5.49 | -6.52 | 20.40 |
| BiSeCl/Si <sub>2</sub> F <sub>2</sub>                                            | -5.50 | -7.01 | -5.50 | -6.99 | 20.62 |
| BiSeCl/SnS <sub>2</sub> Br <sub>2</sub>                                          | -5.50 | -7.01 | -5.49 | -6.98 | 20.33 |
| BiTeCl/BiSI                                                                      | -5.19 | -6.39 | -5.21 | -6.69 | 20.51 |
| BiTeCl/BiSI                                                                      | -5.19 | -6.39 | -5.19 | -6.36 | 21.07 |
| BiTeCl/BiSeI                                                                     | -5.19 | -6.39 | -5.21 | -6.42 | 20.98 |
| BiTeCl/BiSI                                                                      | -5.14 | -6.29 | -5.19 | -6.36 | 20.01 |
| BiTeF/In <sub>2</sub> TeS                                                        | -4.38 | -5.56 | -4.42 | -5.56 | 20.13 |
| BiTeF/MgIn <sub>2</sub> Se <sub>4</sub>                                          | -4.38 | -5.56 | -4.42 | -5.80 | 20.25 |
| BiSI/BiSI                                                                        | -5.21 | -6.69 | -5.19 | -6.36 | 20.37 |
| BiSI/BiSeI                                                                       | -5.21 | -6.69 | -5.21 | -6.42 | 20.76 |
| BiSI/BiSeI                                                                       | -5.19 | -6.36 | -5.21 | -6.42 | 20.80 |
| BiSeI/Ir <sub>2</sub> S <sub>2</sub> Cl <sub>2</sub>                             | -5.11 | -6.30 | -5.09 | -6.29 | 20.84 |
| BiSeI/Fe <sub>2</sub> S <sub>4</sub>                                             | -5.11 | -6.30 | -5.13 | -6.46 | 20.76 |
| HfBrCl/HfClCl                                                                    | -2.33 | -3.69 | -2.28 | -3.57 | 20.12 |
| HfBrCl/HfBr <sub>2</sub>                                                         | -2.33 | -3.69 | -2.28 | -3.50 | 20.06 |

---

|                                                                                                  |       |       |       |       |       |
|--------------------------------------------------------------------------------------------------|-------|-------|-------|-------|-------|
| TiBrCl/TiCl                                                                                      | -2.48 | -3.78 | -2.45 | -3.64 | 20.65 |
| ZrBrCl/TiCl                                                                                      | -2.48 | -3.87 | -2.45 | -3.64 | 20.59 |
| TiBr/ZrCl                                                                                        | -2.38 | -3.41 | -2.41 | -3.72 | 20.71 |
| TiBr/TiBr <sub>2</sub>                                                                           | -2.38 | -3.41 | -2.39 | -3.56 | 20.77 |
| TiBr/ZrBr <sub>2</sub>                                                                           | -2.38 | -3.41 | -2.40 | -3.68 | 20.86 |
| ZrBr/ZrCl                                                                                        | -2.35 | -3.53 | -2.41 | -3.72 | 20.16 |
| ZrBr/TiBr <sub>2</sub>                                                                           | -2.35 | -3.53 | -2.39 | -3.56 | 20.17 |
| ZrBr/ZrBr <sub>2</sub>                                                                           | -2.35 | -3.53 | -2.40 | -3.68 | 20.29 |
| ZrBr/ZrI <sub>2</sub>                                                                            | -2.35 | -3.53 | -2.31 | -3.35 | 20.22 |
| HfCl/HfBr <sub>2</sub>                                                                           | -2.28 | -3.57 | -2.28 | -3.50 | 21.29 |
| ZrCl/TiBr <sub>2</sub>                                                                           | -2.41 | -3.72 | -2.39 | -3.56 | 21.06 |
| ZrCl/ZrBr <sub>2</sub>                                                                           | -2.41 | -3.72 | -2.40 | -3.68 | 21.17 |
| Mg <sub>2</sub> Al <sub>2</sub> Te <sub>5</sub> /Ge <sub>2</sub> Te <sub>2</sub>                 | -3.37 | -4.58 | -3.38 | -4.86 | 20.63 |
| Mg <sub>2</sub> Al <sub>2</sub> Te <sub>5</sub> /Zr <sub>2</sub> Br <sub>4</sub>                 | -3.37 | -4.58 | -3.35 | -4.49 | 20.76 |
| HfSeS/Co <sub>2</sub> H <sub>2</sub> S <sub>4</sub>                                              | -4.62 | -6.13 | -4.61 | -5.82 | 20.57 |
| HfSeS/HfSe <sub>2</sub>                                                                          | -4.62 | -6.13 | -4.60 | -5.81 | 20.28 |
| RhSeI/Ti <sub>2</sub> S <sub>6</sub>                                                             | -4.21 | -5.63 | -4.18 | -5.63 | 20.37 |
| Mg <sub>2</sub> Ga <sub>2</sub> Se <sub>5</sub> /In <sub>2</sub> Si <sub>2</sub> Te <sub>2</sub> | -4.27 | -5.53 | -4.22 | -5.25 | 20.08 |
| Mg <sub>2</sub> In <sub>2</sub> Se <sub>5</sub> /Ti <sub>2</sub> S <sub>6</sub>                  | -4.21 | -5.71 | -4.18 | -5.63 | 20.07 |
| PtTeSe/Ti <sub>2</sub> S <sub>6</sub>                                                            | -4.14 | -5.23 | -4.18 | -5.63 | 20.24 |
| SnSeS/Ir <sub>2</sub> S <sub>2</sub> Cl <sub>2</sub>                                             | -5.10 | -6.58 | -5.09 | -6.29 | 20.56 |
| ZrSeS/Ir <sub>2</sub> S <sub>2</sub> Br <sub>2</sub>                                             | -4.68 | -6.20 | -4.66 | -5.84 | 20.23 |
| WTeSe/TeGe <sub>2</sub> S                                                                        | -3.30 | -4.80 | -3.27 | -4.48 | 20.11 |
| WTeSe/Sn <sub>2</sub> Se <sub>2</sub>                                                            | -3.30 | -4.80 | -3.29 | -4.63 | 20.46 |
| Ag <sub>2</sub> Te <sub>3</sub> /Ga <sub>2</sub> Te <sub>5</sub>                                 | -3.93 | -5.35 | -3.89 | -5.28 | 20.33 |
| Ag <sub>2</sub> Te <sub>3</sub> /Ru <sub>2</sub> Te <sub>4</sub>                                 | -3.93 | -5.35 | -3.92 | -4.99 | 20.82 |
| Bi <sub>2</sub> S <sub>3</sub> /Bi <sub>2</sub> SeSCl <sub>2</sub>                               | -5.83 | -6.87 | -5.85 | -7.37 | 20.17 |
| Al <sub>2</sub> Ge <sub>2</sub> Te <sub>2</sub> /Ir <sub>2</sub> O <sub>2</sub> Br <sub>2</sub>  | -3.67 | -5.03 | -3.65 | -4.99 | 20.85 |
| Al <sub>2</sub> Ge <sub>2</sub> Te <sub>2</sub> /Sc <sub>2</sub> Te <sub>2</sub> Cl <sub>2</sub> | -3.67 | -5.03 | -3.71 | -5.15 | 20.15 |

---

|                                                                    |       |       |       |       |       |
|--------------------------------------------------------------------|-------|-------|-------|-------|-------|
| $\text{Au}_2\text{Se}_2\text{Br}_2/\text{Rh}_4\text{S}_6$          | -5.41 | -6.68 | -5.36 | -6.52 | 20.25 |
| $\text{Ag}_4\text{S}_6/\text{Au}_2\text{I}_2\text{S}_4$            | -4.82 | -6.32 | -4.79 | -6.22 | 20.20 |
| $\text{Ag}_4\text{S}_6/\text{ZnGeSe}_2\text{Br}_2$                 | -4.82 | -6.32 | -4.80 | -6.30 | 20.40 |
| $\text{Ag}_4\text{S}_6/\text{Au}_2\text{Te}_4\text{I}_2$           | -4.21 | -5.60 | -4.26 | -5.61 | 20.13 |
| $\text{Ag}_4\text{S}_6/\text{Nb}_4\text{Br}_2\text{Se}_{12}$       | -4.21 | -5.60 | -4.19 | -5.26 | 20.73 |
| $\text{Al}_4\text{Te}_6/\text{Pd}_2\text{Se}_4$                    | -4.14 | -5.67 | -4.11 | -5.35 | 20.08 |
| $\text{Al}_4\text{Te}_6/\text{Cr}_3\text{Se}_6$                    | -4.14 | -5.67 | -4.11 | -5.27 | 20.06 |
| $\text{Ga}_4\text{Se}_6/\text{Fe}_3\text{Se}_6$                    | -4.89 | -6.44 | -4.87 | -6.23 | 20.02 |
| $\text{Ga}_4\text{Se}_6/\text{Ir}_4\text{S}_8$                     | -4.89 | -6.44 | -4.88 | -6.40 | 20.23 |
| $\text{Ga}_4\text{Se}_6/\text{Sc}_4\text{Te}_6$                    | -4.11 | -5.36 | -4.06 | -5.28 | 20.34 |
| $\text{Bi}_2\text{Se}_2\text{Br}_2/\text{Au}_2\text{Cl}_2$         | -5.61 | -6.80 | -5.63 | -7.11 | 20.45 |
| $\text{In}_4\text{Te}_6/\text{Au}_2\text{Te}_4\text{I}_2$          | -4.22 | -5.51 | -4.26 | -5.61 | 20.28 |
| $\text{Sc}_4\text{Se}_6/\text{Hf}_2\text{IBr}_3$                   | -2.29 | -3.45 | -2.24 | -3.41 | 20.09 |
| $\text{Sc}_4\text{Te}_6/\text{Os}_2\text{Se}_4$                    | -4.06 | -5.28 | -4.07 | -5.46 | 20.98 |
| $\text{Sc}_4\text{Te}_6/\text{Pd}_2\text{Se}_4$                    | -4.06 | -5.28 | -4.11 | -5.35 | 20.17 |
| $\text{Hf}_2\text{Br}_2\text{Cl}_2/\text{Sn}_2\text{SeS}$          | -3.17 | -4.58 | -3.18 | -4.70 | 20.36 |
| $\text{Zr}_2\text{Br}_2\text{Cl}_2/\text{Hf}_2\text{IClBr}_4$      | -3.43 | -4.58 | -3.43 | -4.57 | 21.00 |
| $\text{Zr}_2\text{Br}_2\text{Cl}_2/\text{MgAl}_2\text{Te}_4$       | -3.43 | -4.58 | -3.44 | -4.60 | 20.91 |
| $\text{HfI}_2\text{Br}_2/\text{Hf}_2\text{I}_4$                    | -3.10 | -4.25 | -3.09 | -4.10 | 20.73 |
| $\text{Ir}_2\text{O}_2\text{Br}_2/\text{Hf}_2\text{N}_2\text{I}_2$ | -3.65 | -4.99 | -3.68 | -5.12 | 20.33 |
| $\text{Ir}_2\text{S}_2\text{Br}_2/\text{Co}_2\text{H}_2\text{S}_4$ | -4.66 | -5.84 | -4.61 | -5.82 | 20.13 |
| $\text{Ir}_2\text{S}_2\text{Br}_2/\text{ZrSe}_2$                   | -4.66 | -5.84 | -4.68 | -5.89 | 20.74 |
| $\text{Ir}_2\text{S}_2\text{Br}_2/\text{Os}_2\text{S}_4$           | -4.66 | -5.84 | -4.67 | -6.06 | 20.91 |
| $\text{Co}_2\text{O}_2\text{Cl}_2/\text{Si}_2\text{F}_2$           | -5.49 | -6.52 | -5.50 | -6.99 | 20.49 |
| $\text{Ga}_2\text{Te}_5/\text{Al}_2\text{Ge}_2\text{Te}_6$         | -3.89 | -5.28 | -3.89 | -5.37 | 20.77 |
| $\text{Ga}_2\text{Te}_5/\text{Ge}_2\text{Te}_6\text{P}_2$          | -3.89 | -5.28 | -3.89 | -5.14 | 21.11 |
| $\text{Ga}_2\text{Te}_5/\text{Ta}_2\text{Te}_4\text{Br}_4$         | -3.89 | -5.28 | -3.85 | -4.93 | 20.36 |
| $\text{Ga}_2\text{Te}_5/\text{W}_2\text{Cr}_2\text{Se}_8$          | -3.89 | -5.28 | -3.87 | -5.07 | 20.74 |
| $\text{Ga}_2\text{Te}_5/\text{Nb}_2\text{Br}_6$                    | -3.89 | -5.28 | -3.86 | -4.87 | 20.63 |

---

|                                                                                |       |       |       |       |       |
|--------------------------------------------------------------------------------|-------|-------|-------|-------|-------|
| $\text{Cr}_4\text{O}_{10}/\text{Ag}_4\text{Te}_4\text{Br}_4$                   | -5.60 | -6.92 | -5.60 | -6.86 | 21.28 |
| $\text{Cr}_4\text{O}_{10}/\text{Cu}_4\text{Se}_4\text{I}_4$                    | -5.60 | -6.92 | -5.59 | -6.81 | 21.17 |
| $\text{Ir}_2\text{S}_2\text{Cl}_2/\text{SnSe}_2$                               | -5.09 | -6.29 | -5.12 | -6.46 | 20.59 |
| $\text{Ir}_2\text{S}_2\text{Cl}_2/\text{Fe}_2\text{S}_4$                       | -5.09 | -6.29 | -5.13 | -6.46 | 20.37 |
| $\text{Sc}_2\text{Te}_2\text{Cl}_2/\text{Ge}_2\text{H}_2$                      | -3.71 | -5.15 | -3.73 | -5.22 | 20.44 |
| $\text{Ir}_4\text{Se}_3\text{S}_5/\text{ZrHf}_2\text{Se}_6$                    | -4.63 | -6.18 | -4.63 | -5.84 | 20.31 |
| $\text{Ir}_2\text{S}_2\text{F}_2/\text{Os}_2\text{O}_4$                        | -5.91 | -7.35 | -5.89 | -6.89 | 20.55 |
| $\text{InN}/\text{TiPdS}_2$                                                    | -4.05 | -5.62 | -4.03 | -5.59 | 20.02 |
| $\text{Au}_2\text{Te}_2/\text{Pd}_2\text{Se}_4$                                | -4.10 | -5.17 | -4.11 | -5.35 | 21.10 |
| $\text{Au}_2\text{Te}_2/\text{Cr}_3\text{Se}_6$                                | -4.10 | -5.17 | -4.11 | -5.27 | 20.92 |
| $\text{Au}_2\text{Te}_2/\text{Ga}_2\text{Al}_2\text{Te}_6$                     | -4.10 | -5.17 | -4.16 | -5.55 | 20.11 |
| $\text{In}_2\text{Te}_2\text{I}_2/\text{Nb}_4\text{O}_8$                       | -4.34 | -5.76 | -4.35 | -5.81 | 20.62 |
| $\text{In}_2\text{Te}_2\text{I}_2/\text{Hf}_2\text{P}_2\text{Se}_6$            | -4.34 | -5.76 | -4.30 | -5.39 | 20.30 |
| $\text{In}_2\text{Te}_2\text{I}_2/\text{Zr}_2\text{P}_2\text{Se}_6$            | -4.34 | -5.76 | -4.29 | -5.36 | 20.17 |
| $\text{In}_2\text{Te}_2\text{I}_2/\text{W}_2\text{Cr}_2\text{S}_8$             | -4.34 | -5.76 | -4.29 | -5.73 | 20.04 |
| $\text{Ag}_4\text{Te}_4\text{Br}_4/\text{Cu}_4\text{Te}_4\text{Cl}_4$          | -5.60 | -6.86 | -5.63 | -6.96 | 20.74 |
| $\text{Ag}_4\text{Te}_4\text{Cl}_4/\text{Au}_4\text{S}_4\text{Cl}_4\text{F}_4$ | -5.73 | -6.98 | -5.73 | -7.27 | 20.38 |
| $\text{Ag}_4\text{Se}_4\text{I}_4/\text{Au}_4\text{S}_4\text{Cl}_4\text{F}_4$  | -5.73 | -6.76 | -5.73 | -7.27 | 20.38 |
| $\text{Au}_4\text{S}_4\text{I}_4/\text{Ta}_2\text{Rh}_2\text{S}_8$             | -5.17 | -6.51 | -5.12 | -6.36 | 20.31 |
| $\text{Au}_4\text{S}_4\text{I}_4/\text{OsRuCl}_6$                              | -5.17 | -6.51 | -5.17 | -6.37 | 21.27 |
| $\text{Cu}_4\text{Se}_4\text{Br}_4/\text{Cu}_2\text{Cl}_2\text{I}_4$           | -5.99 | -7.41 | -5.96 | -7.04 | 20.56 |
| $\text{Cu}_4\text{Te}_4\text{Br}_4/\text{Cu}_4\text{Te}_4\text{Cl}_4$          | -5.61 | -6.75 | -5.63 | -6.96 | 20.96 |
| $\text{Pd}_4\text{I}_4\text{Br}_4/\text{Rh}_4\text{S}_8$                       | -5.31 | -6.66 | -5.33 | -6.73 | 20.60 |
| $\text{Y}_4\text{Te}_4\text{Br}_4/\text{Y}_4\text{Te}_4\text{Cl}_4$            | -4.91 | -6.06 | -4.93 | -6.11 | 20.73 |
| $\text{Cu}_4\text{Te}_4\text{Cl}_4/\text{Cu}_4\text{Se}_4\text{I}_4$           | -5.63 | -6.96 | -5.59 | -6.81 | 20.64 |
| $\text{Cu}_4\text{Te}_4\text{I}_4/\text{Rh}_4\text{S}_8$                       | -5.32 | -6.42 | -5.33 | -6.73 | 20.85 |
| $\text{Ge}_2\text{Se}_2/\text{Sn}_2\text{SeS}$                                 | -3.20 | -4.76 | -3.18 | -4.70 | 20.01 |
| $\text{Ge}_2\text{Te}_2/\text{Zr}_2\text{Br}_4$                                | -3.38 | -4.86 | -3.35 | -4.49 | 20.22 |
| $\text{Pd}_4\text{Te}_4\text{P}_4/\text{In}_2\text{P}_2\text{S}_6$             | -4.42 | -5.84 | -4.46 | -5.86 | 20.31 |

---

|                                                                               |       |       |       |       |       |
|-------------------------------------------------------------------------------|-------|-------|-------|-------|-------|
| $\text{Pd}_4\text{Te}_4\text{P}_4/\text{Sr}_4\text{Bi}_4\text{F}_4\text{S}_8$ | -4.42 | -5.84 | -4.38 | -5.76 | 20.24 |
| $\text{In}_2\text{I}_2/\text{HfGeS}_2\text{Br}_2$                             | -4.39 | -5.72 | -4.44 | -5.88 | 20.04 |
| $\text{In}_2\text{I}_2/\text{In}_2\text{Al}_2\text{Te}_6$                     | -4.39 | -5.72 | -4.35 | -5.59 | 20.45 |
| $\text{TeGe}_2\text{S}/\text{Sn}_2\text{Se}_2$                                | -3.27 | -4.48 | -3.29 | -4.63 | 20.88 |
| $\text{TeGe}_2\text{S}/\text{Hf}_2\text{Cl}_4$                                | -3.27 | -4.48 | -3.28 | -4.75 | 20.68 |
| $\text{In}_2\text{TeS}/\text{IrGaS}_2\text{I}_2$                              | -4.42 | -5.56 | -4.45 | -5.63 | 20.59 |
| $\text{In}_2\text{TeS}/\text{HfGeS}_2\text{Br}_2$                             | -4.42 | -5.56 | -4.44 | -5.88 | 20.63 |
| $\text{In}_2\text{TeS}/\text{MgGa}_2\text{Se}_4$                              | -4.42 | -5.56 | -4.39 | -5.53 | 20.24 |
| $\text{In}_2\text{TeS}/\text{MgIn}_2\text{Se}_4$                              | -4.42 | -5.56 | -4.42 | -5.80 | 21.14 |
| $\text{Au}_2\text{Te}_4\text{Cl}_2/\text{Ir}_4\text{Se}_8$                    | -4.34 | -5.93 | -4.34 | -5.90 | 20.03 |
| $\text{Au}_2\text{I}_2\text{S}_4/\text{Bi}_2\text{GeSe}_2\text{I}_4$          | -4.79 | -6.22 | -4.83 | -6.25 | 20.34 |
| $\text{Au}_2\text{Te}_4\text{I}_2/\text{AgBiTe}_6\text{P}_2$                  | -4.26 | -5.61 | -4.22 | -5.30 | 20.44 |
| $\text{Au}_2\text{Te}_4\text{I}_2/\text{Au}_4\text{S}_2$                      | -4.26 | -5.61 | -4.24 | -5.38 | 20.75 |
| $\text{Au}_2\text{Te}_4\text{I}_2/\text{In}_2\text{Si}_2\text{Te}_6$          | -4.26 | -5.61 | -4.23 | -5.41 | 20.57 |
| $\text{Au}_2\text{Te}_4\text{I}_2/\text{Pd}_4\text{In}_2\text{Se}_6$          | -4.26 | -5.61 | -4.26 | -5.55 | 21.17 |
| $\text{Au}_2\text{Te}_4\text{I}_2/\text{Nb}_4\text{I}_2\text{Se}_{12}$        | -4.26 | -5.61 | -4.23 | -5.26 | 20.52 |
| $\text{Bi}_2\text{H}_2\text{S}_4/\text{Bi}_2\text{P}_2\text{S}_6$             | -4.73 | -6.31 | -4.73 | -6.04 | 20.12 |
| $\text{Zn}_2\text{Te}_2/\text{Ru}_2\text{Te}_4$                               | -3.96 | -5.25 | -3.92 | -4.99 | 20.43 |
| $\text{Cu}_2\text{Cl}_2\text{O}_4/\text{Ru}_3\text{S}_3\text{Cl}_6$           | -6.62 | -7.91 | -6.57 | -7.70 | 20.27 |
| $\text{Co}_2\text{H}_2\text{S}_4/\text{HfSe}_2$                               | -4.61 | -5.82 | -4.60 | -5.81 | 20.93 |
| $\text{Au}_4\text{S}_4/\text{RuNiTa}_2\text{Se}_6$                            | -4.54 | -5.88 | -4.49 | -5.69 | 20.27 |
| $\text{Au}_4\text{S}_4/\text{Cu}_{12}\text{S}_6$                              | -4.54 | -5.88 | -4.54 | -6.14 | 20.03 |
| $\text{Au}_4\text{Se}_4/\text{Zr}_2\text{Se}_4$                               | -4.49 | -5.59 | -4.50 | -5.64 | 20.71 |
| $\text{Pd}_2\text{Se}_2\text{Cl}_4/\text{PdPt}_3\text{SeSCl}_6$               | -5.48 | -6.93 | -5.46 | -6.79 | 20.48 |
| $\text{HfGeS}_2\text{Br}_2/\text{Rh}_2\text{P}_2\text{S}_6$                   | -4.44 | -5.88 | -4.40 | -5.75 | 20.26 |
| $\text{HfGeS}_2\text{Br}_2/\text{MgIn}_2\text{Se}_4$                          | -4.44 | -5.88 | -4.42 | -5.80 | 20.68 |
| $\text{HfCl}_2/\text{TiBr}_2$                                                 | -2.41 | -3.88 | -2.39 | -3.56 | 20.60 |
| $\text{HfCl}_2/\text{ZrBr}_2$                                                 | -2.41 | -3.88 | -2.40 | -3.68 | 20.69 |
| $\text{In}_2\text{TeSI}_2/\text{Ni}_2\text{Te}_2\text{S}_6$                   | -3.88 | -5.44 | -3.87 | -5.43 | 20.01 |

|                                                                     |       |       |       |       |       |
|---------------------------------------------------------------------|-------|-------|-------|-------|-------|
| $\text{In}_2\text{TeSI}_2/\text{W}_2\text{Cr}_2\text{Se}_8$         | -3.88 | -5.44 | -3.87 | -5.07 | 20.10 |
| $\text{In}_2\text{TeSI}_2/\text{Nb}_2\text{Br}_6$                   | -3.88 | -5.44 | -3.86 | -4.87 | 20.00 |
| $\text{Hf}_2\text{IClBr}_4/\text{Re}_4\text{Te}_8$                  | -3.43 | -4.57 | -3.46 | -4.79 | 20.54 |
| $\text{SnSe}_2/\text{Fe}_2\text{S}_4$                               | -5.12 | -6.46 | -5.13 | -6.46 | 21.10 |
| $\text{TiBr}_2/\text{ZrBr}_2$                                       | -2.39 | -3.56 | -2.40 | -3.68 | 21.23 |
| $\text{TiSe}_2/\text{Ru}_2\text{S}_4$                               | -4.83 | -6.29 | -4.83 | -6.41 | 20.12 |
| $\text{RhIr}_2\text{GaS}_4\text{Br}_4/\text{OsRuCl}_6$              | -5.16 | -6.30 | -5.17 | -6.37 | 21.08 |
| $\text{AgAlTe}_6\text{P}_2/\text{Nb}_2\text{Te}_4\text{Cl}_4$       | -4.00 | -5.06 | -3.99 | -5.01 | 20.57 |
| $\text{AgBiTe}_6\text{P}_2/\text{Au}_4\text{S}_2$                   | -4.22 | -5.30 | -4.24 | -5.38 | 20.69 |
| $\text{AgBiTe}_6\text{P}_2/\text{In}_2\text{Si}_2\text{Te}_6$       | -4.22 | -5.30 | -4.23 | -5.41 | 21.10 |
| $\text{AgBiTe}_6\text{P}_2/\text{Pd}_4\text{In}_2\text{Se}_6$       | -4.22 | -5.30 | -4.26 | -5.55 | 20.58 |
| $\text{Hf}_2\text{Br}_4/\text{Hf}_2\text{I}_4$                      | -3.10 | -4.44 | -3.09 | -4.10 | 20.96 |
| $\text{Os}_2\text{Te}_4/\text{Zr}_2\text{Cl}_4$                     | -3.57 | -4.95 | -3.54 | -4.70 | 20.63 |
| $\text{Pd}_2\text{I}_4/\text{PdNiIr}_2\text{Se}_8$                  | -4.72 | -6.19 | -4.71 | -5.74 | 20.59 |
| $\text{Pd}_2\text{Se}_4/\text{Cr}_3\text{Se}_6$                     | -4.11 | -5.35 | -4.11 | -5.27 | 21.31 |
| $\text{Pd}_2\text{Se}_4/\text{Ga}_2\text{Al}_2\text{Te}_6$          | -4.11 | -5.35 | -4.16 | -5.55 | 20.30 |
| $\text{Au}_4\text{S}_2/\text{In}_2\text{Ge}_2\text{Te}_6$           | -4.24 | -5.38 | -4.20 | -5.35 | 20.20 |
| $\text{Au}_4\text{S}_2/\text{W}_2\text{Cr}_2\text{S}_8$             | -4.24 | -5.38 | -4.29 | -5.73 | 20.09 |
| $\text{Si}_2\text{Te}_4/\text{MoAu}_2\text{Se}_4$                   | -3.72 | -4.81 | -3.72 | -4.97 | 21.33 |
| $\text{Ag}_4\text{Te}_2/\text{In}_2\text{P}_2\text{S}_6$            | -4.41 | -5.85 | -4.46 | -5.86 | 20.07 |
| $\text{Ag}_4\text{Te}_2/\text{Rh}_2\text{P}_2\text{S}_6$            | -4.41 | -5.85 | -4.40 | -5.75 | 20.79 |
| $\text{Ag}_4\text{Te}_2/\text{Zr}_2\text{P}_2\text{S}_6$            | -4.41 | -5.85 | -4.41 | -5.91 | 20.67 |
| $\text{Ag}_4\text{Te}_2/\text{Sr}_4\text{Bi}_4\text{F}_4\text{S}_8$ | -4.41 | -5.85 | -4.38 | -5.76 | 20.33 |
| $\text{Zr}_2\text{Br}_4/\text{W}_2\text{Mo}_2\text{Te}_8$           | -3.35 | -4.49 | -3.38 | -4.66 | 20.57 |
| $\text{Zr}_2\text{Cl}_4/\text{ZrNiF}_6$                             | -3.54 | -4.70 | -3.56 | -5.00 | 20.66 |
| $\text{Zr}_2\text{Cl}_4/\text{Zr}_2\text{ClBr}_5$                   | -3.54 | -4.70 | -3.50 | -4.56 | 20.29 |
| $\text{RuNiTa}_2\text{Se}_6/\text{Fe}_2\text{Te}_6\text{P}_2$       | -4.49 | -5.69 | -4.45 | -5.62 | 20.36 |
| $\text{Cr}_3\text{Se}_6/\text{Ga}_2\text{Al}_2\text{Te}_6$          | -4.11 | -5.27 | -4.16 | -5.55 | 20.28 |
| $\text{Nb}_4\text{O}_8/\text{In}_2\text{Al}_2\text{Te}_6$           | -4.35 | -5.81 | -4.35 | -5.59 | 20.86 |

|                                                                                                                |       |       |       |       |       |
|----------------------------------------------------------------------------------------------------------------|-------|-------|-------|-------|-------|
| Re <sub>4</sub> Te <sub>8</sub> /Hf <sub>2</sub> BrI <sub>5</sub>                                              | -3.46 | -4.79 | -3.43 | -4.46 | 20.68 |
| PdNiIr <sub>2</sub> Se <sub>8</sub> /Bi <sub>2</sub> P <sub>2</sub> S <sub>6</sub>                             | -4.71 | -5.74 | -4.73 | -6.04 | 20.85 |
| PdNiIr <sub>2</sub> Se <sub>8</sub> /Ir <sub>4</sub> Se <sub>2</sub> S <sub>6</sub>                            | -4.71 | -5.74 | -4.71 | -6.24 | 20.45 |
| Rh <sub>4</sub> Se <sub>8</sub> /Ta <sub>2</sub> Ir <sub>2</sub> S <sub>8</sub>                                | -4.94 | -5.99 | -5.00 | -6.33 | 20.08 |
| Rh <sub>4</sub> Se <sub>8</sub> /Ni <sub>2</sub> SeS <sub>3</sub>                                              | -4.94 | -5.99 | -4.95 | -6.30 | 21.08 |
| Ta <sub>4</sub> O <sub>8</sub> /Ga <sub>2</sub> Al <sub>2</sub> Te <sub>6</sub>                                | -4.19 | -5.68 | -4.16 | -5.55 | 20.21 |
| Al <sub>2</sub> Ge <sub>2</sub> Te <sub>6</sub> /Ge <sub>2</sub> Te <sub>6</sub> P <sub>2</sub>                | -3.89 | -5.37 | -3.89 | -5.14 | 20.74 |
| Al <sub>2</sub> Ge <sub>2</sub> Te <sub>6</sub> /Ta <sub>2</sub> Te <sub>4</sub> Br <sub>4</sub>               | -3.89 | -5.37 | -3.85 | -4.93 | 20.05 |
| Al <sub>2</sub> Ge <sub>2</sub> Te <sub>6</sub> /W <sub>2</sub> Cr <sub>2</sub> Se <sub>8</sub>                | -3.89 | -5.37 | -3.87 | -5.07 | 20.40 |
| Al <sub>2</sub> Ge <sub>2</sub> Te <sub>6</sub> /Nb <sub>2</sub> Br <sub>6</sub>                               | -3.89 | -5.37 | -3.86 | -4.87 | 20.29 |
| In <sub>2</sub> Al <sub>2</sub> Te <sub>6</sub> /Rh <sub>2</sub> P <sub>2</sub> S <sub>6</sub>                 | -4.35 | -5.59 | -4.40 | -5.75 | 20.18 |
| In <sub>2</sub> Al <sub>2</sub> Te <sub>6</sub> /Sr <sub>4</sub> Bi <sub>4</sub> F <sub>4</sub> S <sub>8</sub> | -4.35 | -5.59 | -4.38 | -5.76 | 20.62 |
| Bi <sub>2</sub> P <sub>2</sub> S <sub>6</sub> /Hf <sub>4</sub> S <sub>2</sub> Se <sub>6</sub>                  | -4.73 | -6.04 | -4.67 | -6.01 | 20.04 |
| Fe <sub>2</sub> Te <sub>6</sub> P <sub>2</sub> /In <sub>2</sub> P <sub>2</sub> S <sub>6</sub>                  | -4.45 | -5.62 | -4.46 | -5.86 | 20.95 |
| In <sub>2</sub> Ge <sub>2</sub> Te <sub>6</sub> /In <sub>2</sub> Si <sub>2</sub> Te <sub>6</sub>               | -4.20 | -5.35 | -4.23 | -5.41 | 20.57 |
| In <sub>2</sub> Ge <sub>2</sub> Te <sub>6</sub> /Pd <sub>4</sub> In <sub>2</sub> Se <sub>6</sub>               | -4.20 | -5.35 | -4.26 | -5.55 | 20.11 |
| Ge <sub>2</sub> Te <sub>6</sub> P <sub>2</sub> /Nb <sub>2</sub> Te <sub>4</sub> Br <sub>4</sub>                | -3.89 | -5.14 | -3.83 | -5.05 | 20.01 |
| Ge <sub>2</sub> Te <sub>6</sub> P <sub>2</sub> /Ta <sub>2</sub> Te <sub>4</sub> Br <sub>4</sub>                | -3.89 | -5.14 | -3.85 | -4.93 | 20.46 |
| Ge <sub>2</sub> Te <sub>6</sub> P <sub>2</sub> /W <sub>2</sub> Cr <sub>2</sub> Se <sub>8</sub>                 | -3.89 | -5.14 | -3.87 | -5.07 | 20.91 |
| Hf <sub>2</sub> P <sub>2</sub> Se <sub>6</sub> /Zr <sub>2</sub> P <sub>2</sub> Se <sub>6</sub>                 | -4.30 | -5.39 | -4.29 | -5.36 | 20.68 |
| RuH <sub>2</sub> O <sub>2</sub> /Y <sub>2</sub> NH <sub>2</sub> O <sub>2</sub>                                 | -1.39 | -2.83 | -1.34 | -2.52 | 20.18 |
| In <sub>2</sub> Si <sub>2</sub> Te <sub>6</sub> /Pd <sub>4</sub> In <sub>2</sub> Se <sub>6</sub>               | -4.23 | -5.41 | -4.26 | -5.55 | 20.71 |
| Ni <sub>2</sub> Te <sub>2</sub> S <sub>6</sub> /Nb <sub>2</sub> Br <sub>6</sub>                                | -3.87 | -5.43 | -3.86 | -4.87 | 20.25 |
| Nb <sub>2</sub> Te <sub>4</sub> Br <sub>4</sub> /Sc <sub>2</sub> P <sub>2</sub> Se <sub>6</sub>                | -3.83 | -5.05 | -3.77 | -4.99 | 20.07 |
| Nb <sub>2</sub> Te <sub>4</sub> Br <sub>4</sub> /W <sub>2</sub> Cr <sub>2</sub> Se <sub>8</sub>                | -3.83 | -5.05 | -3.87 | -5.07 | 20.40 |
| Nb <sub>2</sub> Te <sub>4</sub> Br <sub>4</sub> /MoAg <sub>7</sub> Te <sub>4</sub>                             | -3.83 | -5.05 | -3.80 | -4.91 | 20.56 |
| Rh <sub>2</sub> P <sub>2</sub> S <sub>6</sub> /Zr <sub>2</sub> P <sub>2</sub> S <sub>6</sub>                   | -4.40 | -5.75 | -4.41 | -5.91 | 20.49 |
| Nb <sub>2</sub> Te <sub>4</sub> I <sub>4</sub> /Ta <sub>2</sub> Te <sub>4</sub> I <sub>4</sub>                 | -3.76 | -5.04 | -3.75 | -4.93 | 21.24 |
| Nb <sub>2</sub> Te <sub>4</sub> I <sub>4</sub> /Hf <sub>2</sub> Ge <sub>2</sub> Te <sub>8</sub>                | -3.76 | -5.04 | -3.73 | -4.79 | 20.63 |

|                                                                              |       |       |       |       |       |
|------------------------------------------------------------------------------|-------|-------|-------|-------|-------|
| $\text{Nb}_2\text{Te}_4\text{I}_4/\text{Zr}_2\text{Sn}_2\text{Te}_8$         | -3.76 | -5.04 | -3.70 | -4.73 | 20.09 |
| $\text{Nb}_2\text{Te}_4\text{I}_4/\text{MoAu}_2\text{Se}_4$                  | -3.76 | -5.04 | -3.72 | -4.97 | 20.57 |
| $\text{Ta}_2\text{Te}_4\text{Br}_4/\text{W}_2\text{Cr}_2\text{Se}_8$         | -3.85 | -4.93 | -3.87 | -5.07 | 20.81 |
| $\text{Sc}_2\text{P}_2\text{Se}_6/\text{MoAu}_2\text{Se}_4$                  | -3.77 | -4.99 | -3.72 | -4.97 | 20.18 |
| $\text{Ta}_2\text{Te}_4\text{I}_4/\text{Hf}_2\text{Ge}_2\text{Te}_8$         | -3.75 | -4.93 | -3.73 | -4.79 | 20.54 |
| $\text{Zr}_2\text{P}_2\text{S}_6/\text{Sr}_4\text{Bi}_4\text{F}_4\text{S}_8$ | -4.41 | -5.91 | -4.38 | -5.76 | 20.06 |
| $\text{HfZr}_3\text{BrCl}_7/\text{Hf}_2\text{BrI}_5$                         | -3.48 | -4.66 | -3.43 | -4.46 | 20.04 |
| $\text{W}_2\text{Cr}_2\text{Se}_8/\text{Nb}_2\text{Br}_6$                    | -3.87 | -5.07 | -3.86 | -4.87 | 21.14 |
| $\text{Hf}_2\text{Ge}_2\text{Te}_8/\text{Nb}_4\text{Te}_{12}\text{Br}_2$     | -3.73 | -4.79 | -3.76 | -4.94 | 20.43 |
| $\text{Hf}_2\text{Ge}_2\text{Te}_8/\text{Ta}_4\text{Te}_{12}\text{Br}_2$     | -3.73 | -4.79 | -3.74 | -4.83 | 20.44 |
| $\text{Hf}_2\text{Ge}_2\text{Te}_8/\text{Nb}_4\text{Te}_{12}\text{Cl}_2$     | -3.73 | -4.79 | -3.73 | -4.91 | 21.13 |
| $\text{Zr}_2\text{Ge}_2\text{Te}_8/\text{Nb}_4\text{Te}_{12}\text{Cl}_2$     | -3.69 | -4.81 | -3.73 | -4.91 | 20.26 |
| $\text{Hf}_2\text{Si}_2\text{Te}_8/\text{W}_2\text{Cl}_6$                    | -3.65 | -4.81 | -3.65 | -4.82 | 21.16 |
| $\text{Ir}_2\text{Ni}_2\text{S}_8/\text{Ta}_2\text{Ir}_2\text{S}_8$          | -5.01 | -6.37 | -5.00 | -6.33 | 21.13 |
| $\text{Ta}_2\text{Rh}_2\text{S}_8/\text{OsRuCl}_6$                           | -5.12 | -6.36 | -5.17 | -6.37 | 20.26 |
| $\text{Zr}_2\text{Si}_2\text{Te}_8/\text{W}_2\text{Cl}_6$                    | -3.63 | -4.82 | -3.65 | -4.82 | 20.60 |
| $\text{MgGa}_2\text{Se}_4/\text{MgIn}_2\text{Se}_4$                          | -4.39 | -5.53 | -4.42 | -5.80 | 20.47 |
| $\text{Nb}_4\text{Te}_{12}\text{Br}_2/\text{Ta}_4\text{Te}_{12}\text{Br}_2$  | -3.76 | -4.94 | -3.74 | -4.83 | 20.79 |
| $\text{Nb}_4\text{Te}_{12}\text{Br}_2/\text{Nb}_4\text{Te}_{12}\text{Cl}_2$  | -3.76 | -4.94 | -3.73 | -4.91 | 20.52 |
| $\text{Nb}_4\text{Te}_{12}\text{Cl}_2/\text{Ta}_4\text{Te}_{12}\text{Cl}_2$  | -3.73 | -4.91 | -3.69 | -4.82 | 20.21 |

**Table S6.** Calculated formation energies ( $E_f$ , in  $meV$ ) and binding energies ( $E_b$ , in  $meV/\text{\AA}^2$ ) for four representative heterostructures:  $\text{Si}_2\text{F}_2/\text{Ga}_2\text{Te}_2$ ,  $\text{Si}_2\text{F}_2/\text{Si}_2\text{H}_2$ ,  $\text{HfBr}_2/\text{HfCl}$ ,  $\text{ZrBr}_2/\text{ZrCl}$ .

|                                                | $E_f$ ( $meV$ ) | $E_b$ ( $meV/\text{\AA}^2$ ) |
|------------------------------------------------|-----------------|------------------------------|
| $\text{Si}_2\text{F}_2/\text{Si}_2\text{H}_2$  | -114.26         | -9.23                        |
| $\text{Si}_2\text{F}_2/\text{Ga}_2\text{Te}_2$ | -285.37         | -25.33                       |
| $\text{HfBr}_2/\text{HfCl}$                    | -57.10          | -11.69                       |
| $\text{ZrBr}_2/\text{ZrCl}$                    | -205.86         | -20.16                       |

**Table S7.** Bader charge variations for the top layer ( $Q_T$ ), the bottom layer ( $Q_B$ ) in representative heterostructures. The values represent net charge deviations with respect to neutral atoms (in units of  $e$ ). Positive values indicate electron accumulation, and negative values indicate electron depletion.

|                                                | $Q_T (e)$ | $Q_B (e)$ |
|------------------------------------------------|-----------|-----------|
| $\text{Si}_2\text{F}_2/\text{Si}_2\text{H}_2$  | 0.0361    | -0.0361   |
| $\text{Si}_2\text{F}_2/\text{Ga}_2\text{Te}_2$ | 0.1800    | -0.1800   |
| $\text{HfBr}_2/\text{HfICl}$                   | 0.0025    | -0.0025   |
| $\text{ZrBr}_2/\text{ZrICl}$                   | 0.0108    | -0.0108   |

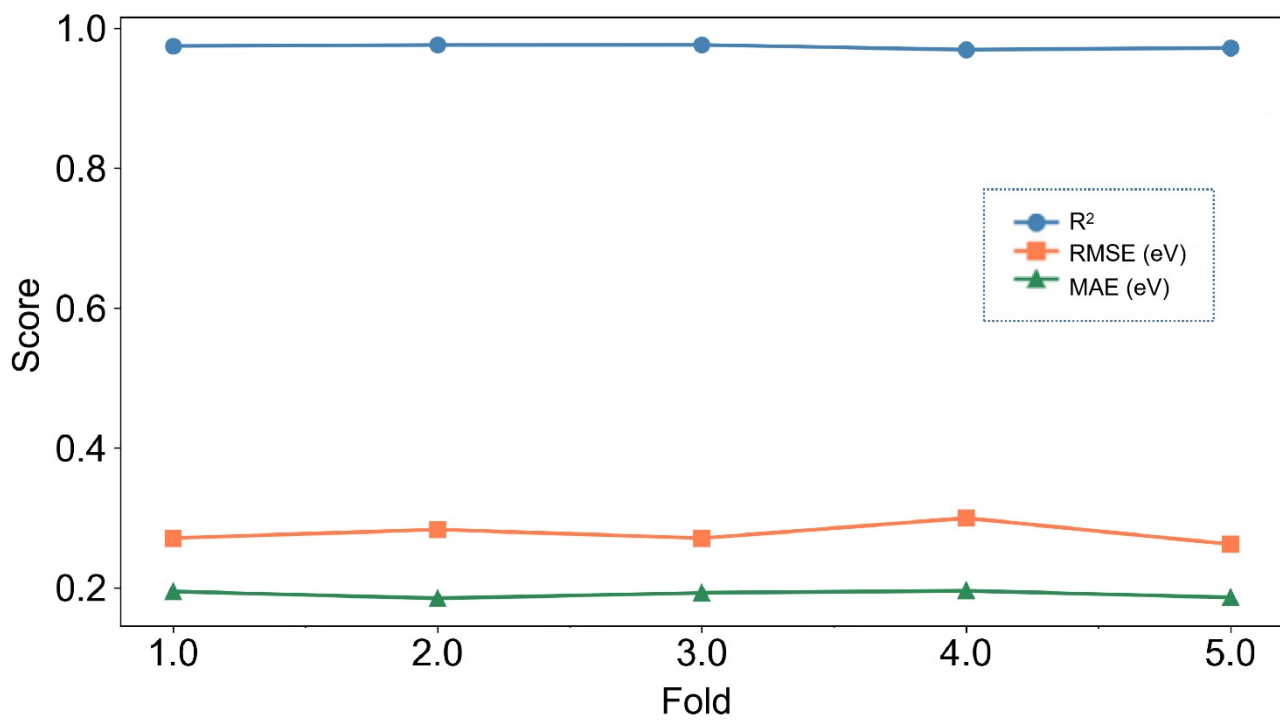

**Figure S1.** Five-fold cross-validation performance of the XGBoost model.

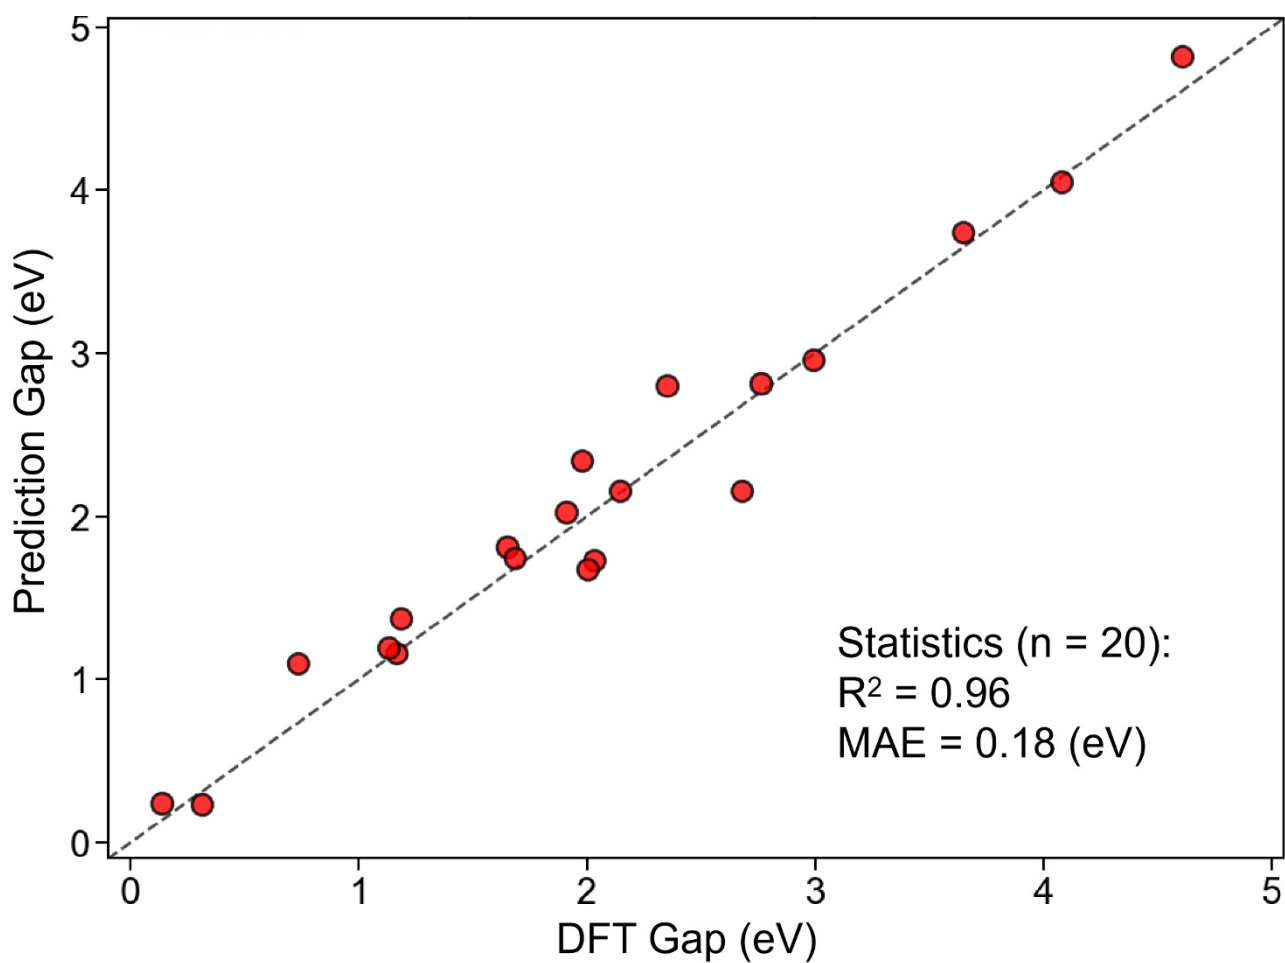

**Figure S2.** Prediction performance of the optimal XGBoost model on an independent test set consisting of 20 held-out samples.

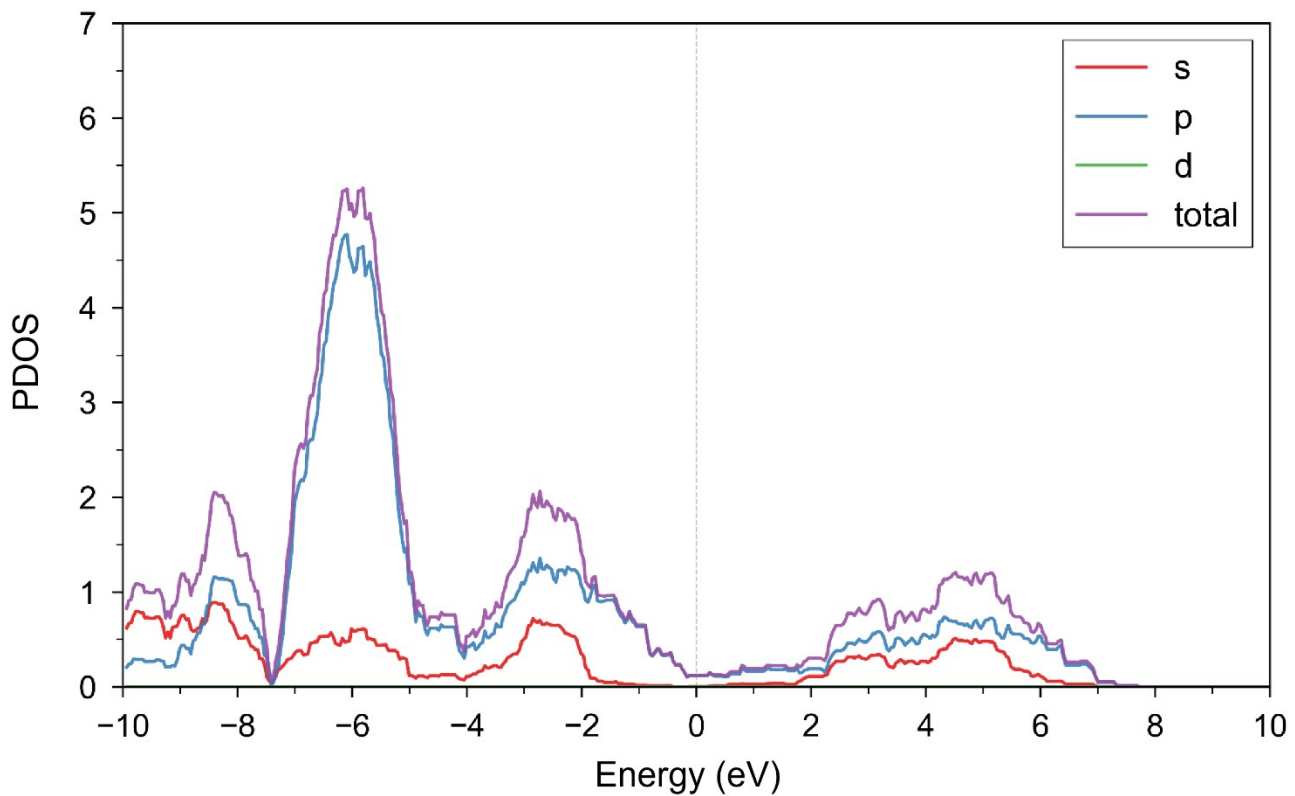

**Figure S3.** Partial density of states (PDOS) of the Si<sub>2</sub>F<sub>2</sub>/Si<sub>2</sub>H<sub>2</sub> heterostructure, showing the orbital contributions from Si, F, and H atoms near the band edges.

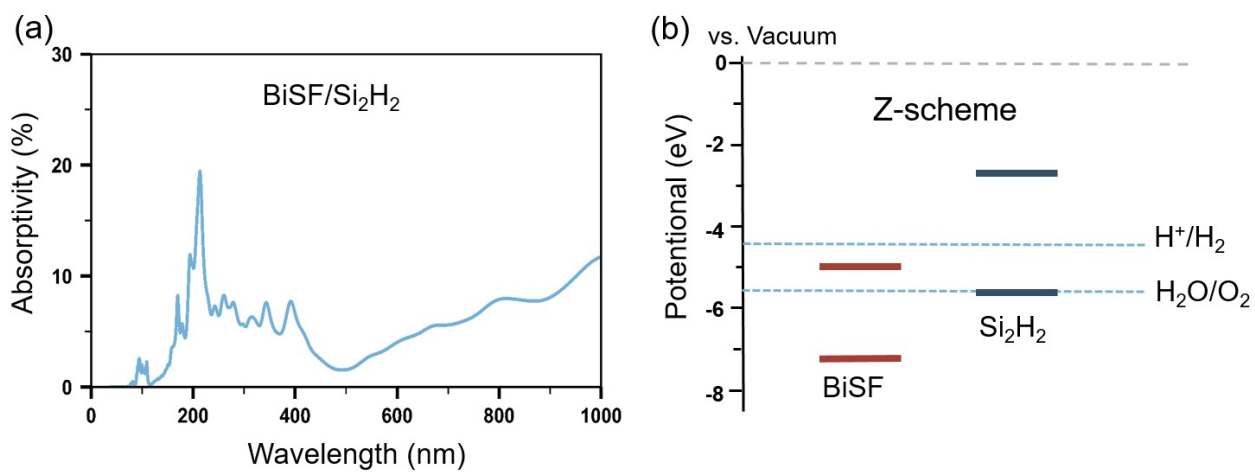

**Figure S4.** Optical absorption spectrum and electronic band structure of the BiSF/Si<sub>2</sub>H<sub>2</sub> heterostructure.

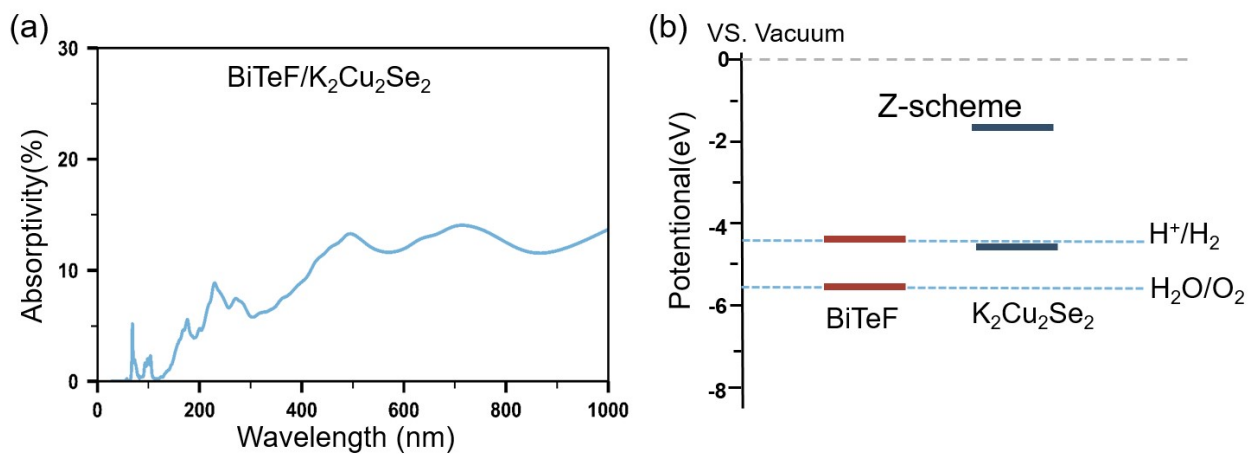

**Figure S5.** Optical absorption spectrum and electronic band structure of the BiTeF/K<sub>2</sub>Cu<sub>2</sub>Se<sub>2</sub> heterostructure.

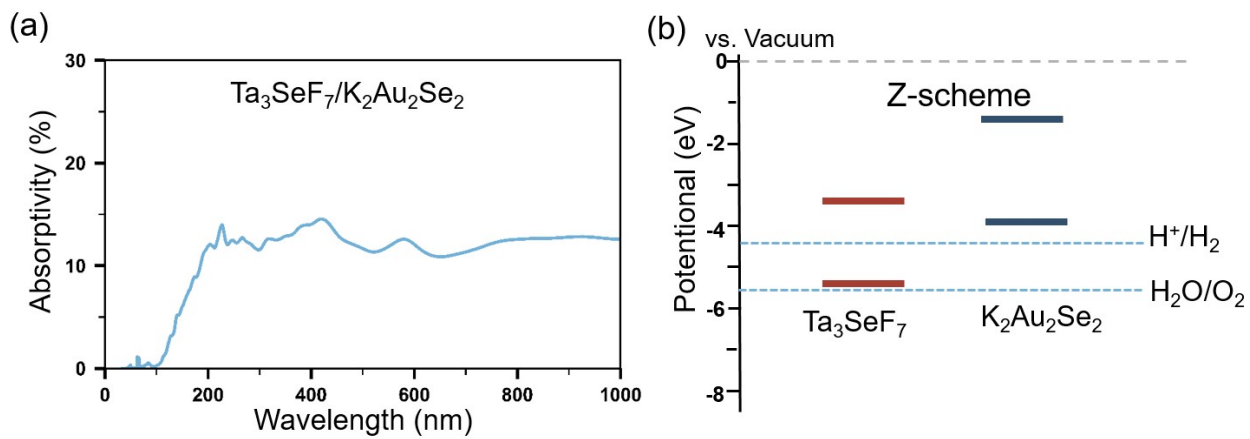

**Figure S6.** Optical absorption spectrum and electronic band structure of the  $\text{Ta}_3\text{SeF}_7/\text{K}_2\text{Au}_2\text{Se}_2$  heterostructure.

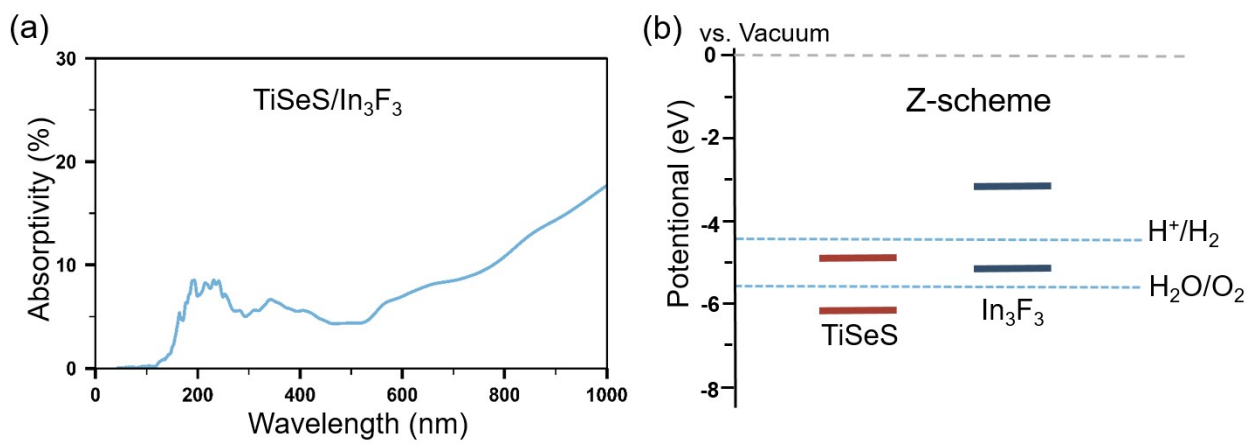

**Figure S7.** Optical absorption spectrum and electronic band structure of the TiSeS/In<sub>3</sub>F<sub>3</sub> heterostructure.

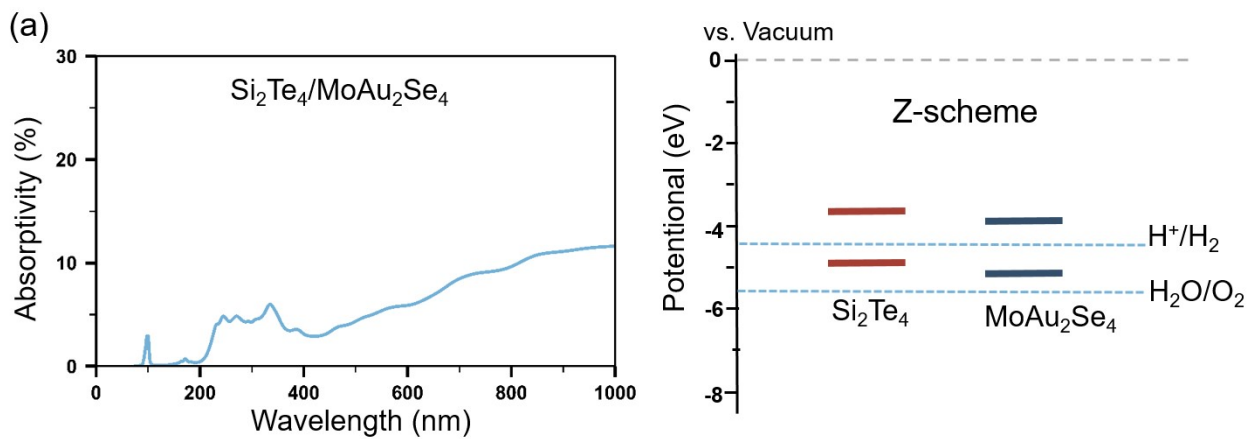

**Figure S8.** Optical absorption spectrum and electronic band structure of the  $\text{Si}_2\text{Te}_4/\text{MoAu}_2\text{Se}_4$  heterostructure.

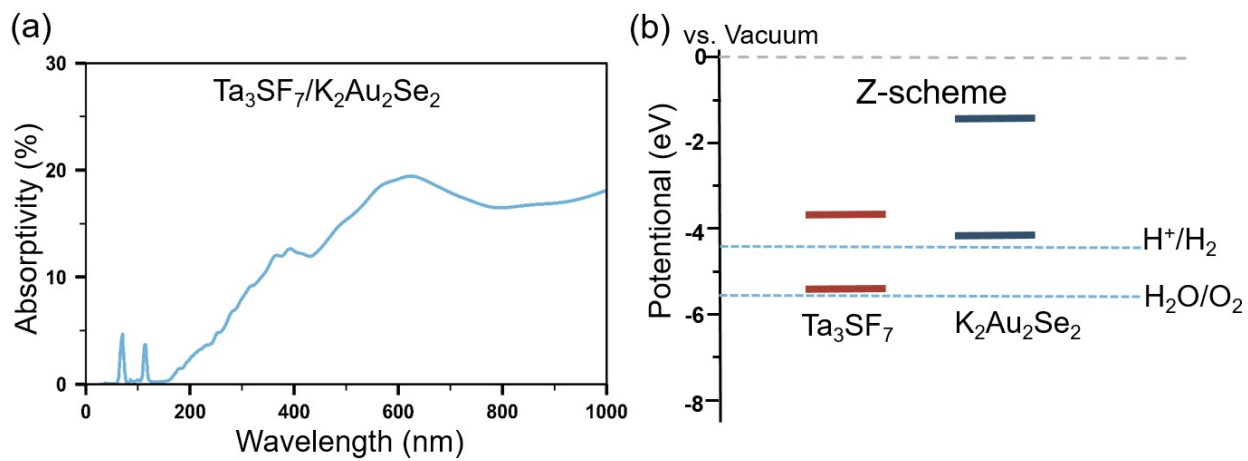

**Figure S9.** Optical absorption spectrum and electronic band structure of the  $\text{Ta}_3\text{SF}_7/\text{K}_2\text{Au}_2\text{Se}_2$  heterostructure.

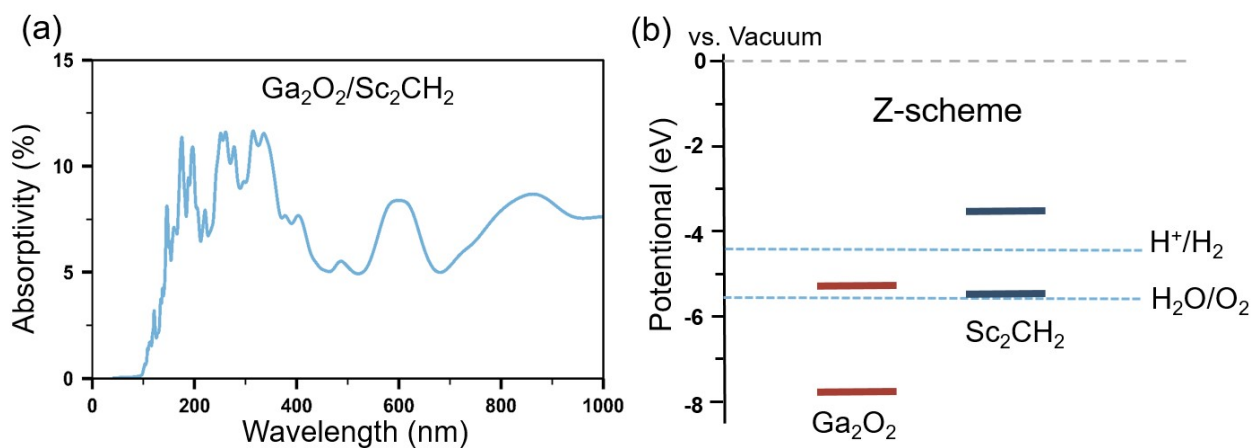

**Figure S10.** Optical absorption spectrum and electronic band structure of the Ga<sub>2</sub>O<sub>2</sub>/Sc<sub>2</sub>CH<sub>2</sub> heterostructure.

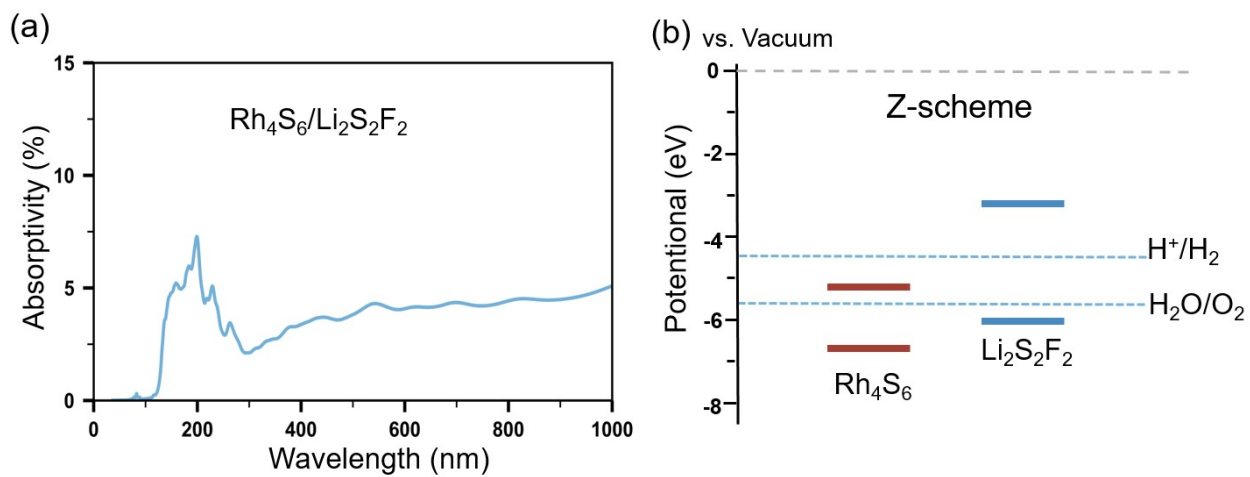

**Figure S11.** Optical absorption spectrum and electronic band structure of the  $\text{Rh}_4\text{S}_6/\text{Li}_2\text{S}_2\text{F}_2$  heterostructure.

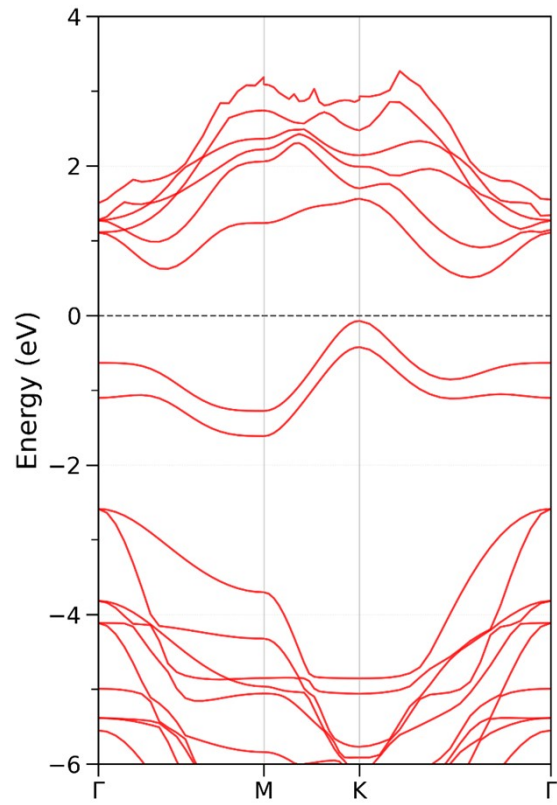

**Figure S12.** Band structure of the representative heterostructure HfBr<sub>2</sub>/HfICl.

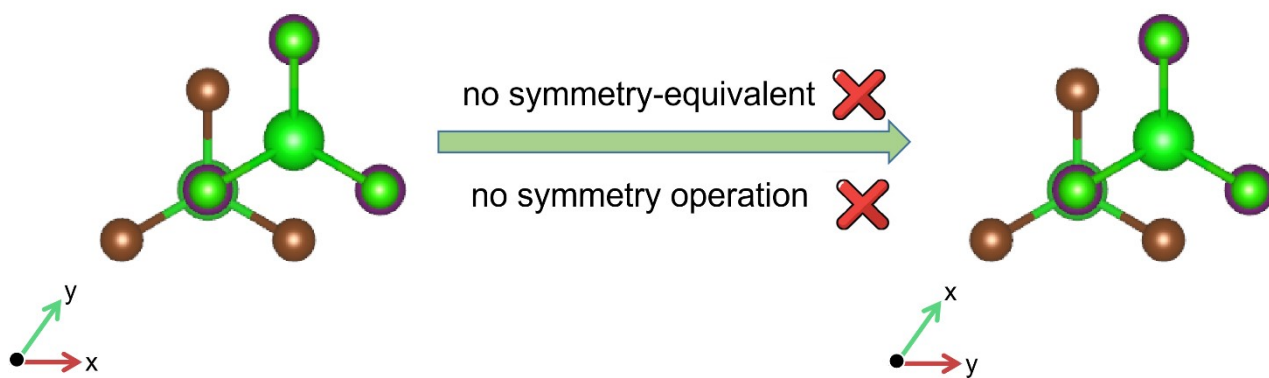

**Figure S13.** The representative heterostructures exhibits no symmetry operations, and therefore no symmetric equivalents exist.

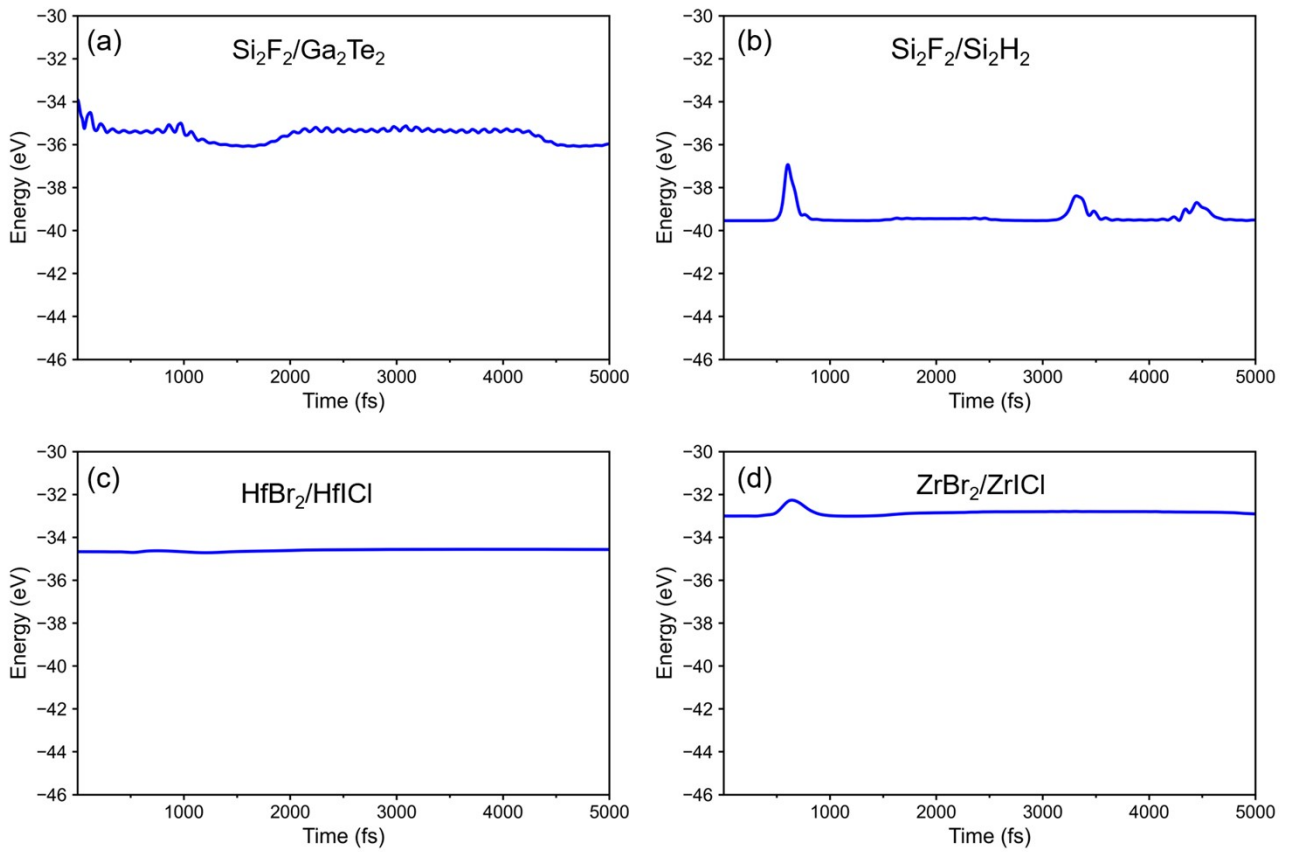

**Figure S14.** Time evolution of the total energy during ab initio molecular dynamics (AIMD) simulations performed in the NVT ensemble at 300 K for four representative heterostructures: (a)  $\text{Si}_2\text{F}_2/\text{Ga}_2\text{Te}_2$ , (b)  $\text{Si}_2\text{F}_2/\text{Si}_2\text{H}_2$ , (c)  $\text{HfBr}_2/\text{HfCl}$ , (d)  $\text{ZrBr}_2/\text{ZrCl}$ .

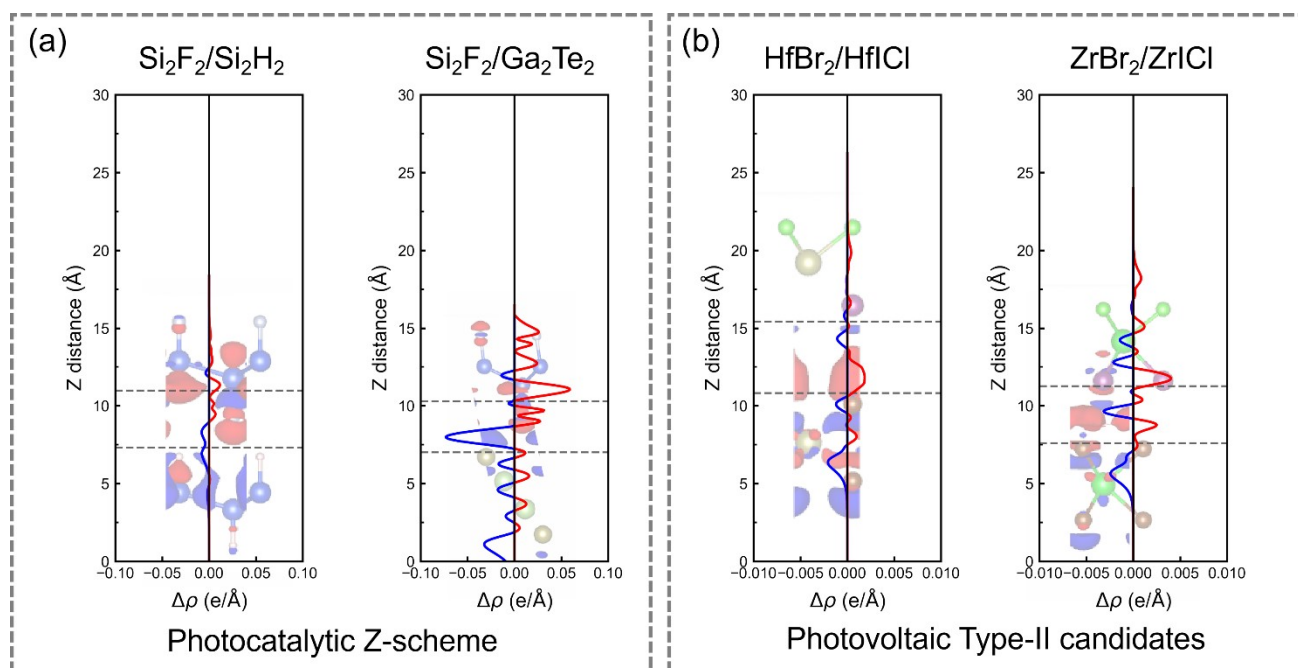

**Figure S15.** Charge density difference (CDD) and planar-averaged charge density difference profiles ( $\Delta\rho(z)$ ) for four representative heterostructures: (a)  $\text{Si}_2\text{F}_2/\text{Si}_2\text{H}_2$  and  $\text{Si}_2\text{F}_2/\text{Ga}_2\text{Te}_2$ , (b)  $\text{HfBr}_2/\text{HfCl}$  and  $\text{ZrBr}_2/\text{ZrCl}$ . The blue and red regions in the CDD plots indicate electron accumulation and depletion, respectively.

To further assess the structural stability of the screened heterostructures, we performed additional energetic and finite-temperature analyses on several representative systems. Four heterostructures,  $\text{Si}_2\text{F}_2/\text{Si}_2\text{H}_2$ ,  $\text{Si}_2\text{F}_2/\text{Ga}_2\text{Te}_2$ ,  $\text{HfBr}_2/\text{HfCl}$ , and  $\text{ZrBr}_2/\text{ZrCl}$ , were selected as prototypical examples, as they span both photocatalytic and photovoltaic candidates identified in our screening workflow and cover a range of chemical compositions, band alignments, and interfacial interaction strengths. The calculated formation energies ( $E_f$ ) and binding energies ( $E_b$ ) for these systems (see Table S6) are all negative, indicating thermodynamically favorable formation and stable interlayer coupling. To further evaluate their thermal stability, ab initio molecular dynamics (AIMD) simulations were carried out at ambient conditions. As shown in Fig. S14, all four systems exhibit small and well-bounded total energy fluctuations during the simulations. No noticeable structural distortion, bond breaking and interlayer delamination is observed, and the lattice frameworks remain intact throughout the simulation time. These results confirm that the heterostructures possess good thermodynamic stability at finite temperature.

Further insight into the interfacial charge redistribution was obtained from charge density difference (CDD), planar-averaged charge density difference ( $\Delta\rho(z)$ ), and Bader charge analyses for four representative

heterostructures, namely  $\text{Si}_2\text{F}_2/\text{Si}_2\text{H}_2$ ,  $\text{Si}_2\text{F}_2/\text{Ga}_2\text{Te}_2$ ,  $\text{HfBr}_2/\text{HfCl}$ , and  $\text{ZrBr}_2/\text{ZrCl}$ . These systems were selected to represent both photocatalytic Z-scheme and photovoltaic type-II candidates identified in this work. As shown in Fig. S15, the CDD isosurfaces reveal pronounced charge redistribution localized at the van der Waals interfaces, characterized by electron accumulation and depletion on opposite sides of the interface. The corresponding  $\Delta\rho(z)$  profiles exhibit clear asymmetry along the out-of-plane direction, indicating the formation of interfacial dipoles and associated built-in electric fields. The Bader charge analysis further quantifies the interlayer charge transfer (see Table S7). Among the four systems,  $\text{Si}_2\text{F}_2/\text{Ga}_2\text{Te}_2$  exhibits the largest charge transfer ( $\pm 0.1800$  e), suggesting a strong interfacial polarization. In comparison,  $\text{Si}_2\text{F}_2/\text{Si}_2\text{H}_2$  shows a moderate charge transfer ( $\pm 0.0361$  e), while  $\text{HfBr}_2/\text{HfCl}$ , and  $\text{ZrBr}_2/\text{ZrCl}$  display much smaller values of  $\pm 0.0025$  e and  $\pm 0.0108$  e, respectively, indicative of relatively weak interfacial polarization. These results provide direct microscopic evidence for the interfacial charge separation mechanism proposed for both photocatalytic and photovoltaic applications.
